# Supplementary material for: New Sulfanilamide Derivatives Incorporating Heterocyclic Carboxamide Moieties as Carbonic Anhydrase Inhibitors
Source: MDPI journal article supplement (doi:10.3390/ph14080828), 2021-08-23
Supplement: s1 [file s1]

## **Supplementary Material**

### **Table of Contents**

|                                                                         |   |
|-------------------------------------------------------------------------|---|
| I. $^1\text{H}$ , $^{13}\text{C}$ NMR and LCMS Spectra of Products..... | 2 |
|-------------------------------------------------------------------------|---|

vgk001

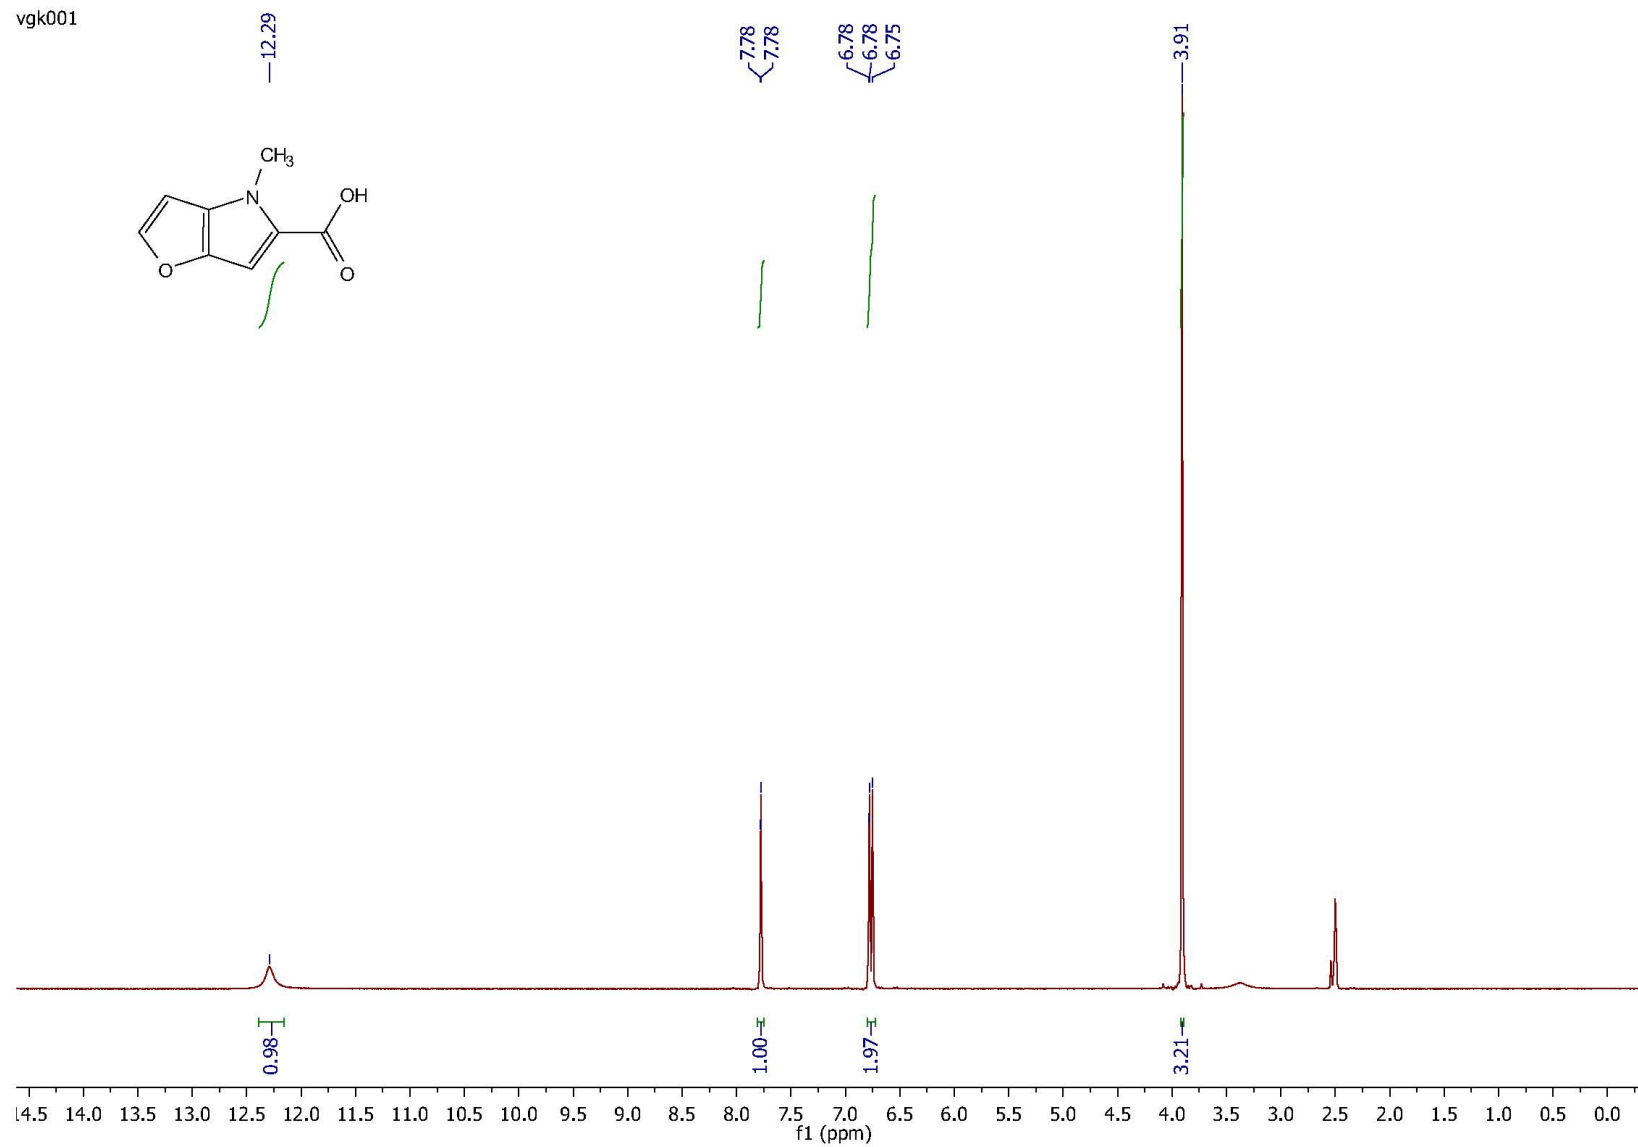

**Figure S1.** <sup>1</sup>H NMR spectrum of 4-Methyl-4H-furo[3,2-b]pyrrole-5-carboxylic acid (**3a**).

13816 in DMSO-D6

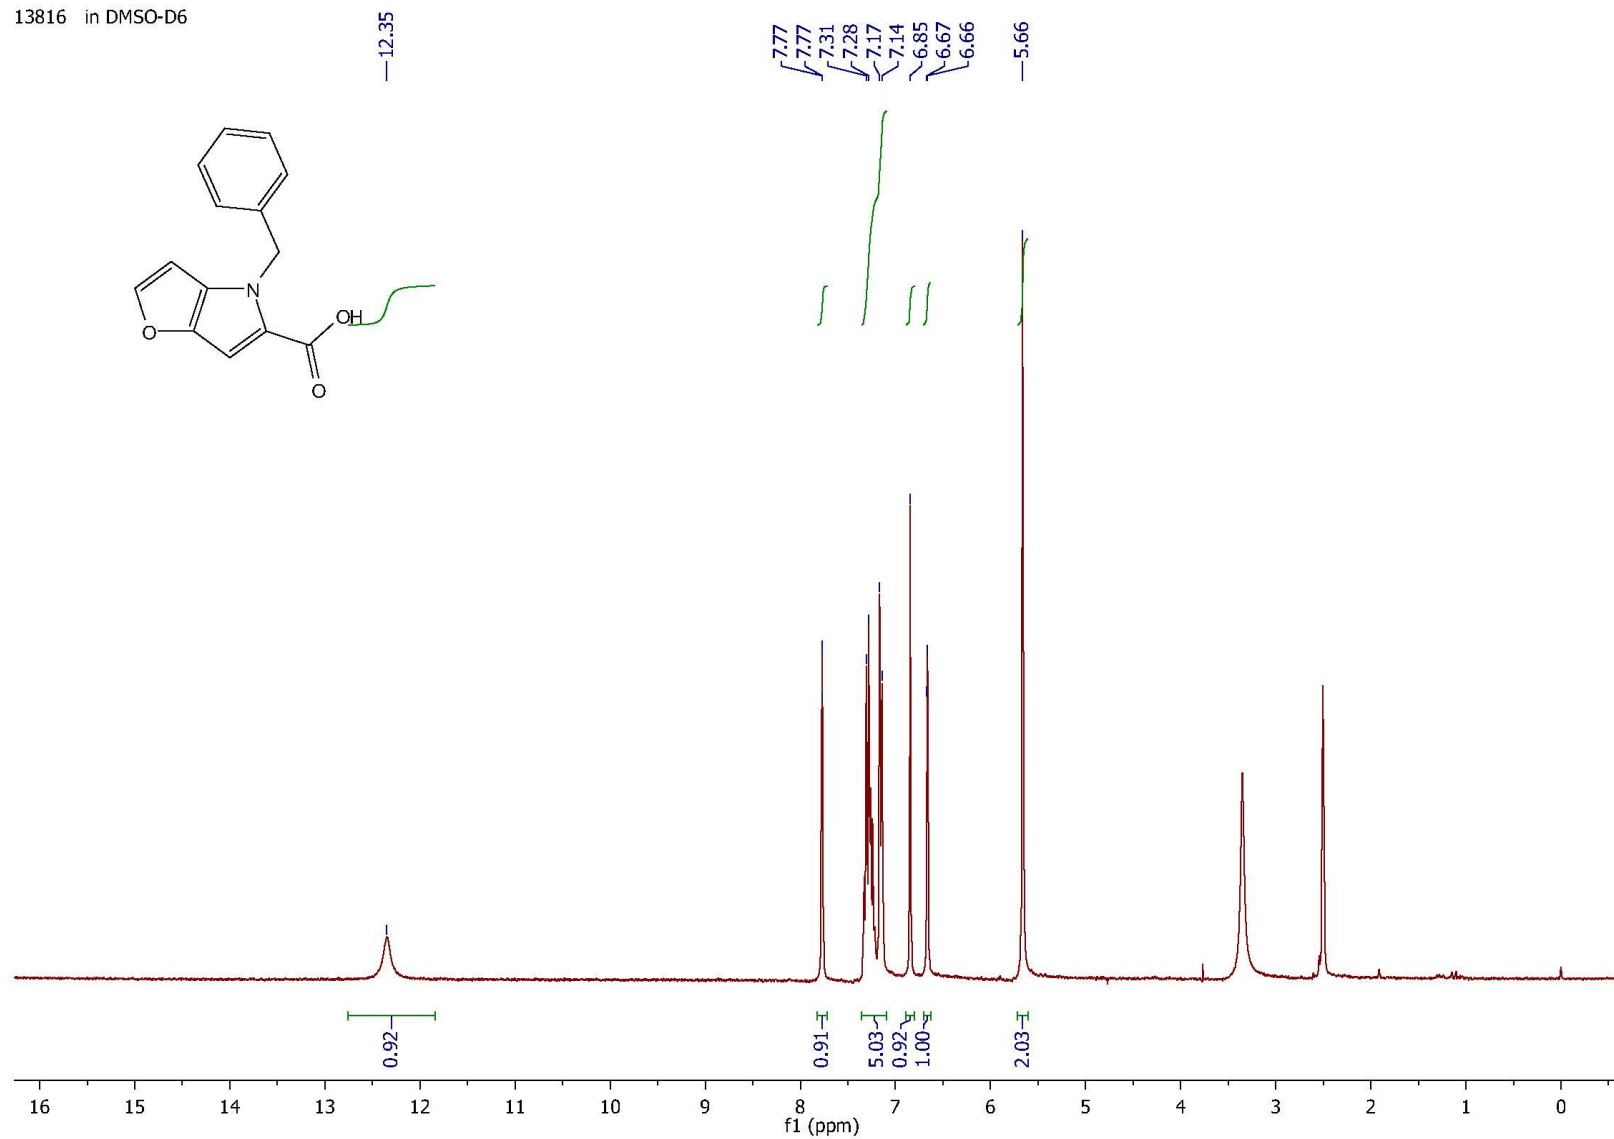

**Figure S2.** <sup>1</sup>H NMR spectrum of 4-Benzyl-4H-furo[3,2-b]pyrrole-5-carboxylic acid (**3c**).

vgk003

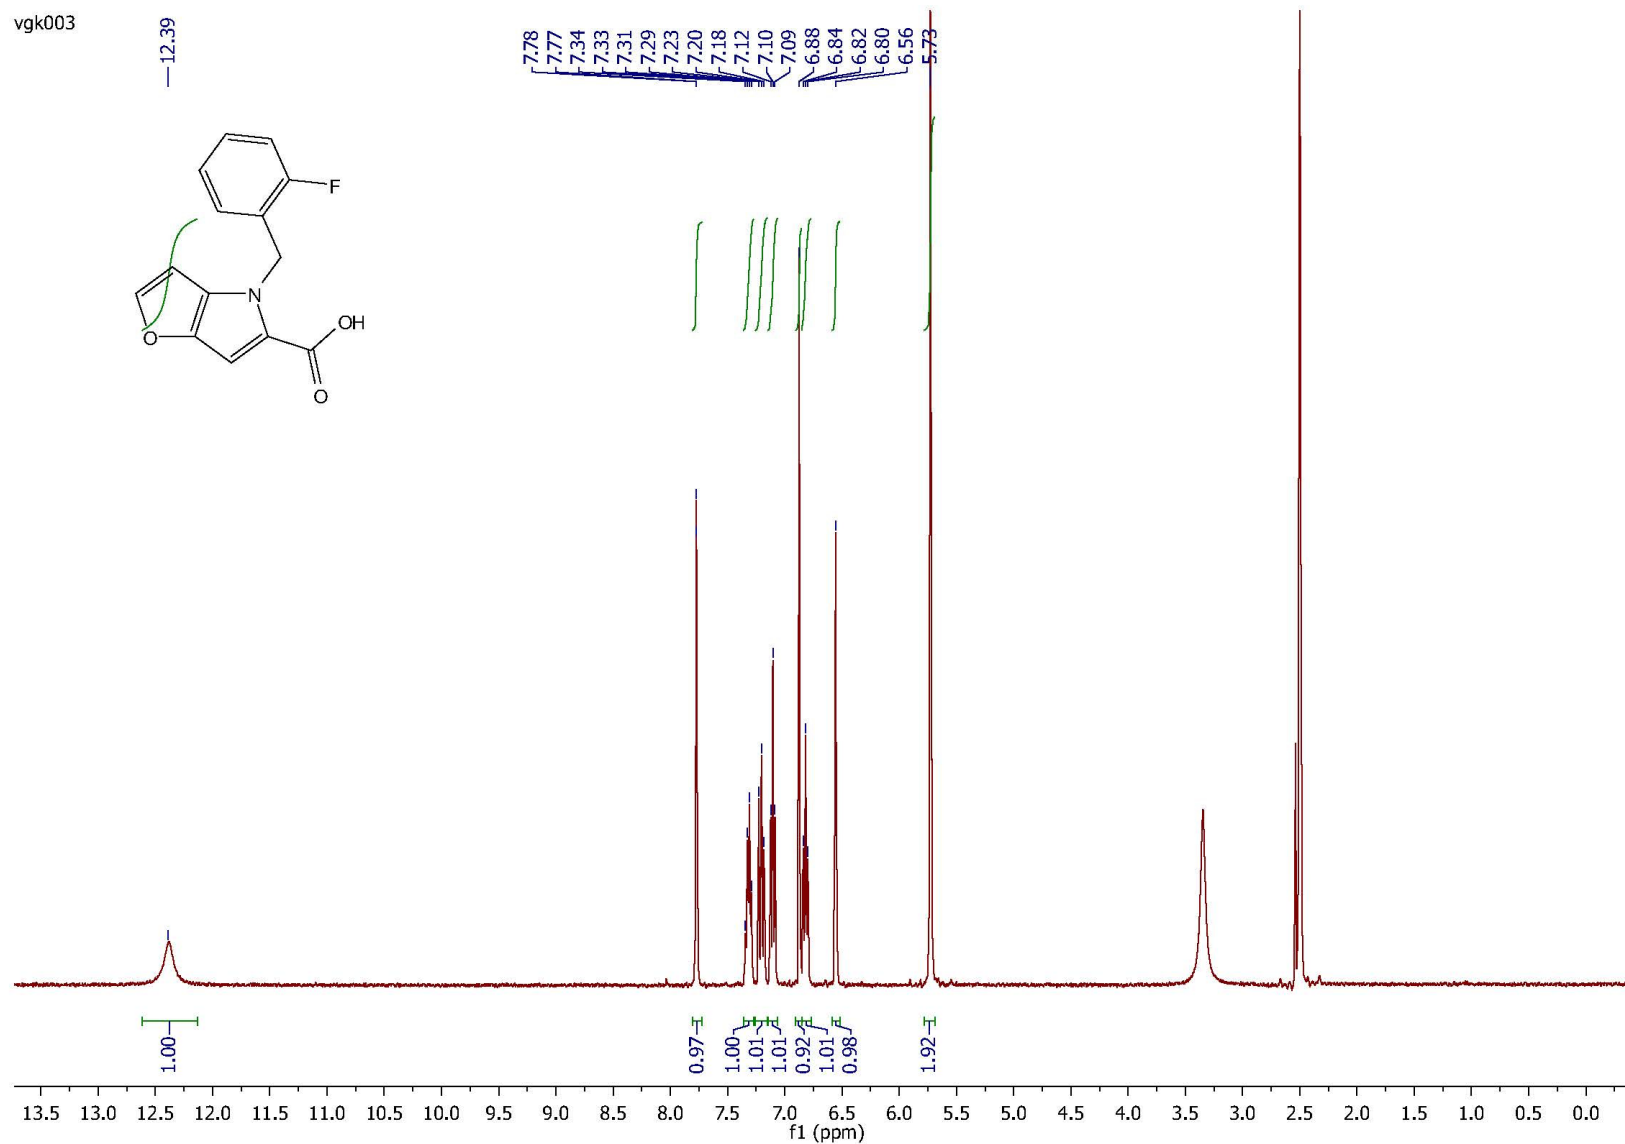

**Figure S3.** <sup>1</sup>H NMR spectrum of 4-(2-Fluorobenzyl)-4H-furo[3,2-b]pyrrole-5-carboxylic acid (3d).



13792 in DMSO-D6

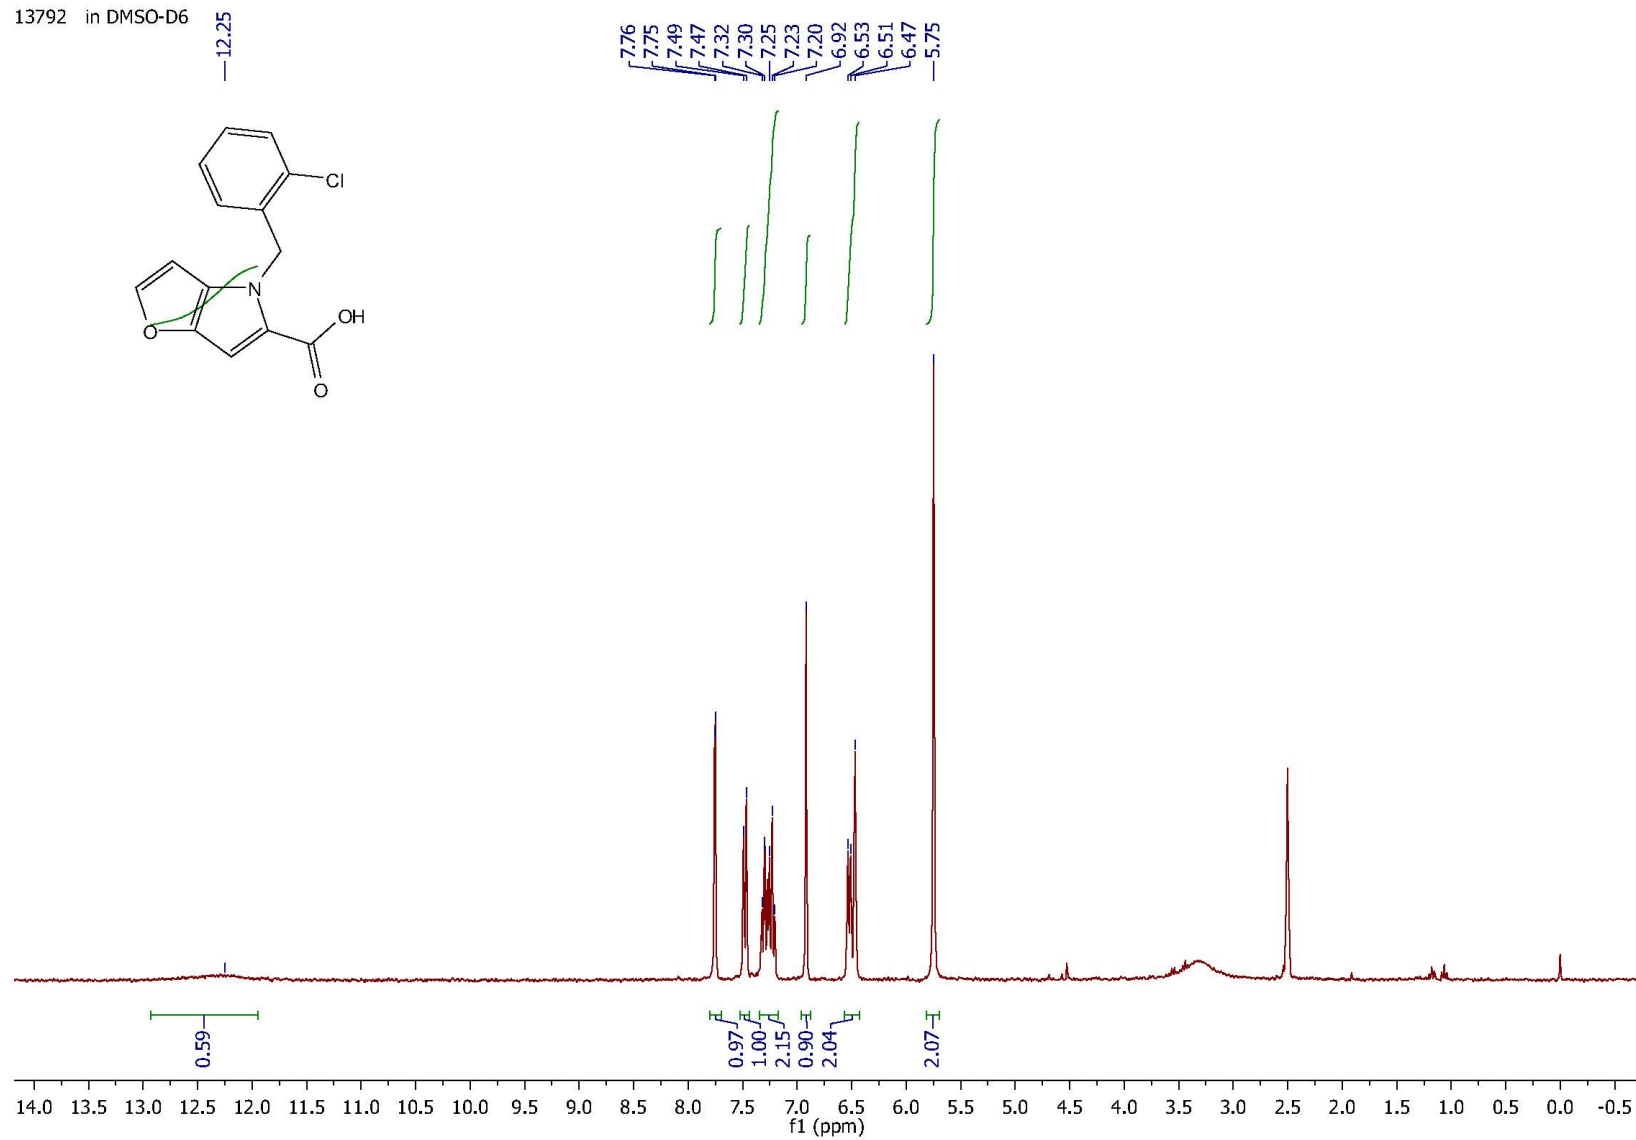

**Figure S4.** <sup>1</sup>H NMR spectrum of 4-(2-Chlorobenzyl)-4H-furo[3,2-b]pyrrole-5-carboxylic acid (**3e**).

vgk005

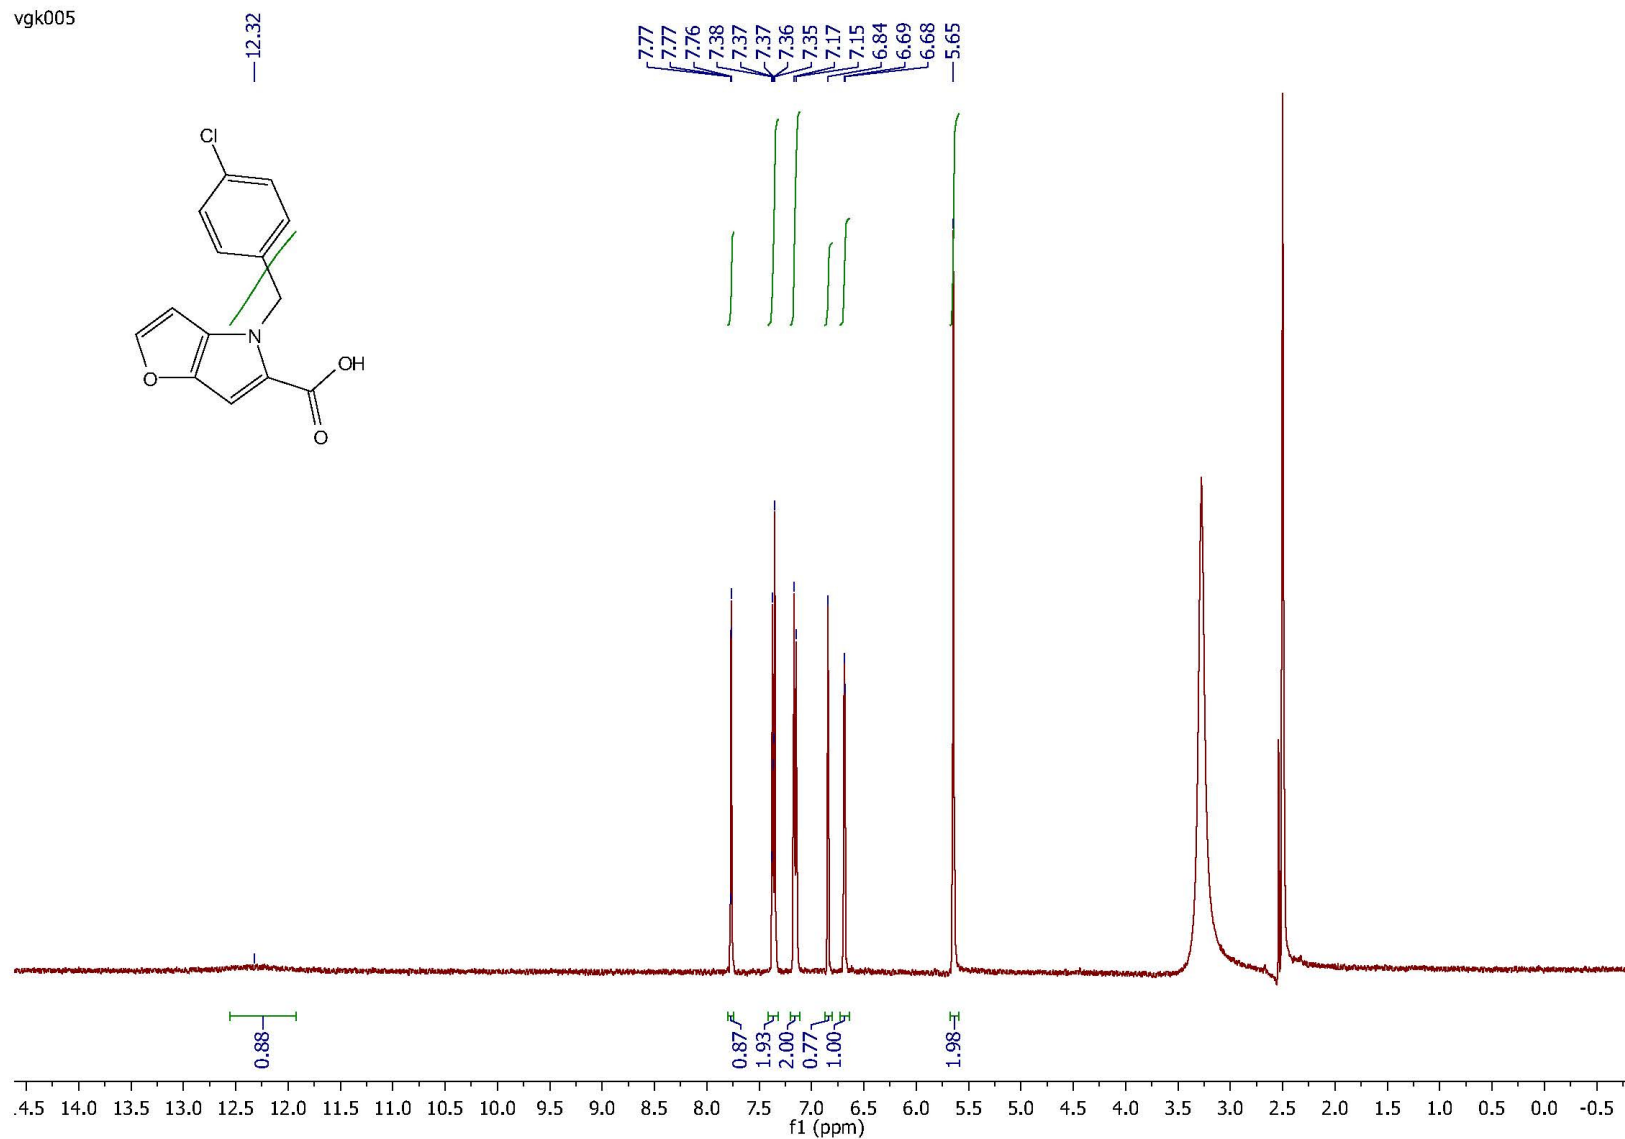

**Figure S5.** <sup>1</sup>H NMR spectrum of 4-(4-Chlorobenzyl)-4H-furo[3,2-b]pyrrole-5-carboxylic acid (**3f**).

iggs-2815

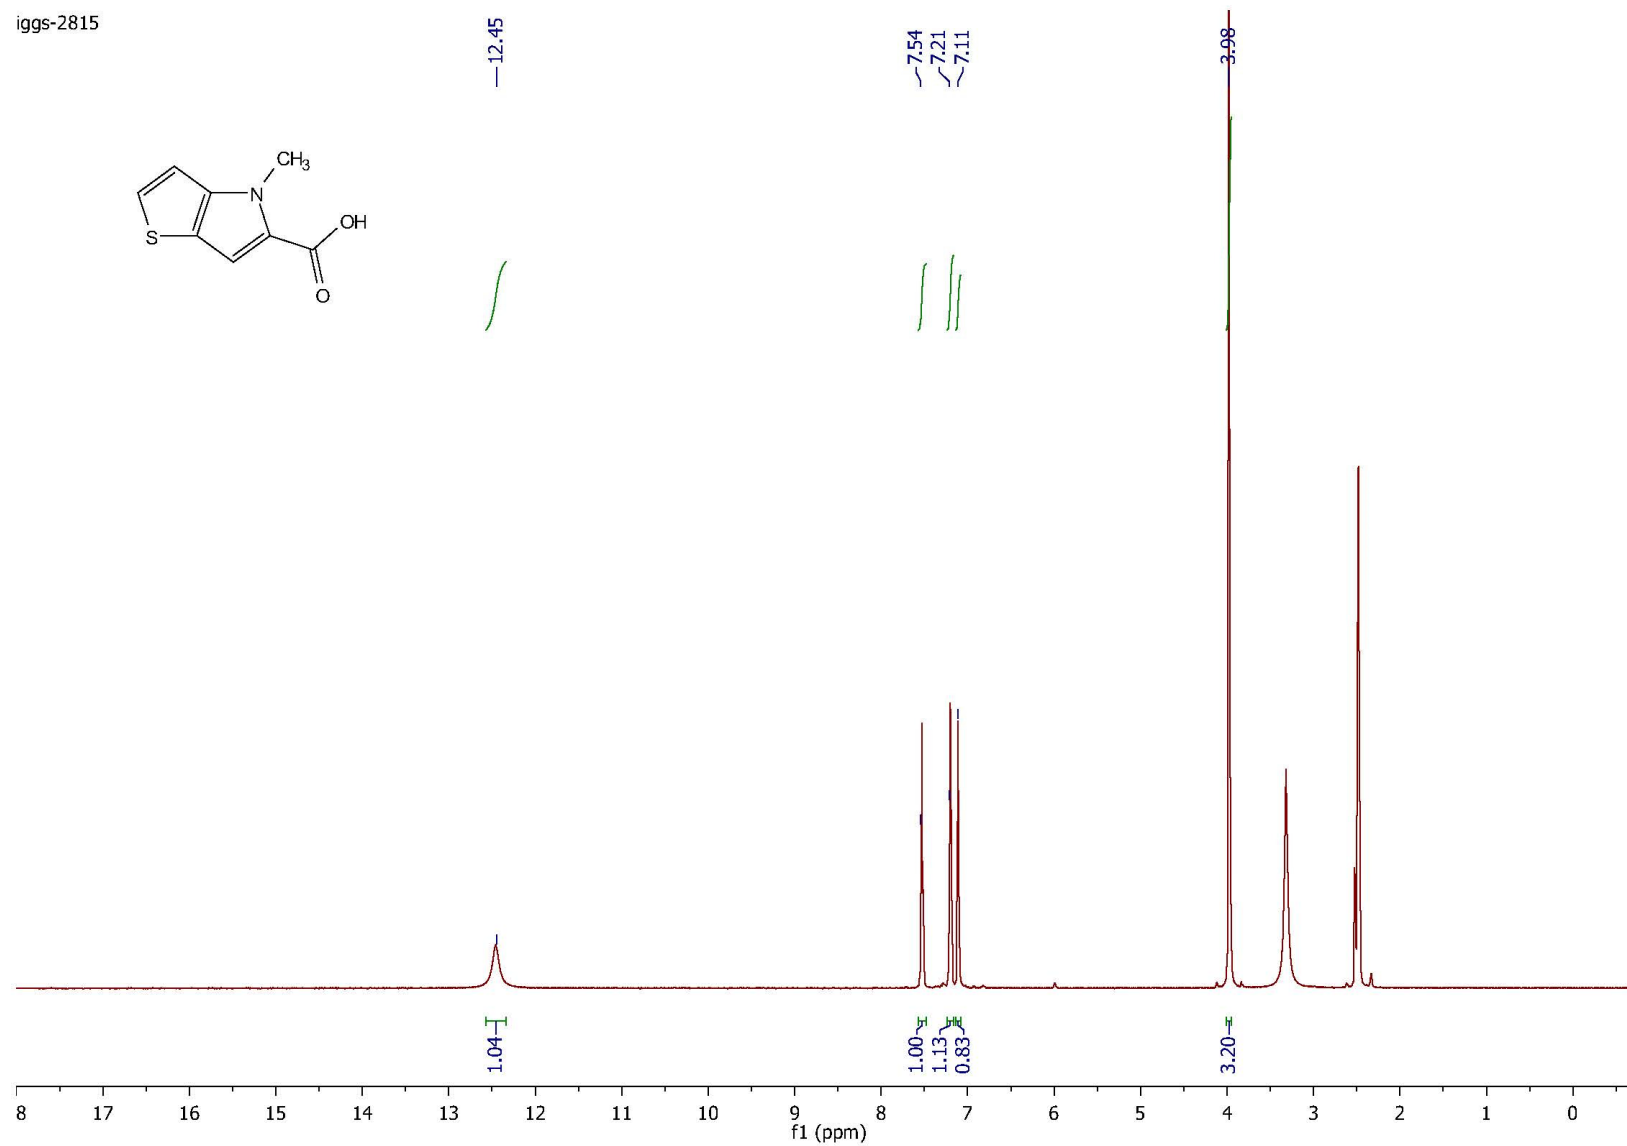

**Figure S6.** <sup>1</sup>H NMR spectrum of 4-Methyl-4H-thieno[3,2-b]pyrrole-5-carboxylic acid (**4a**).

vgk007

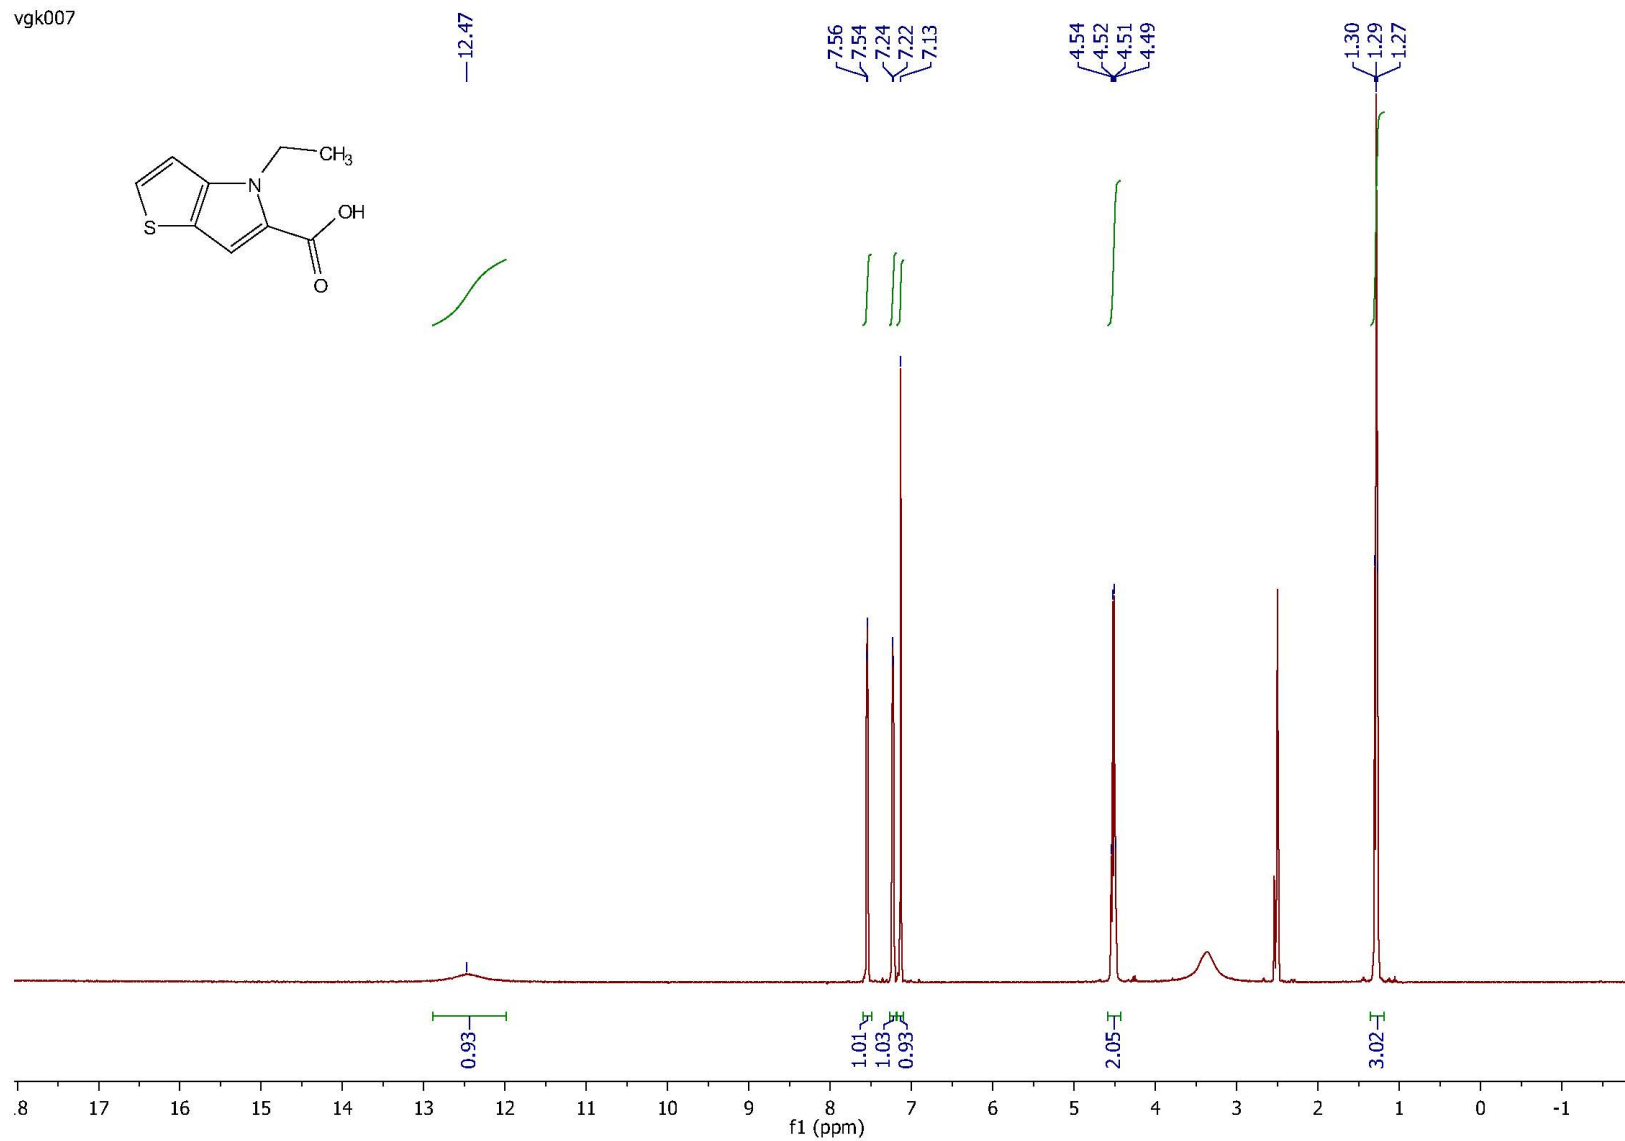

**Figure S7.** <sup>1</sup>H NMR spectrum of 4-Ethyl-4H-thieno[3,2-b]pyrrole-5-carboxylic acid (**4b**).

vgk008

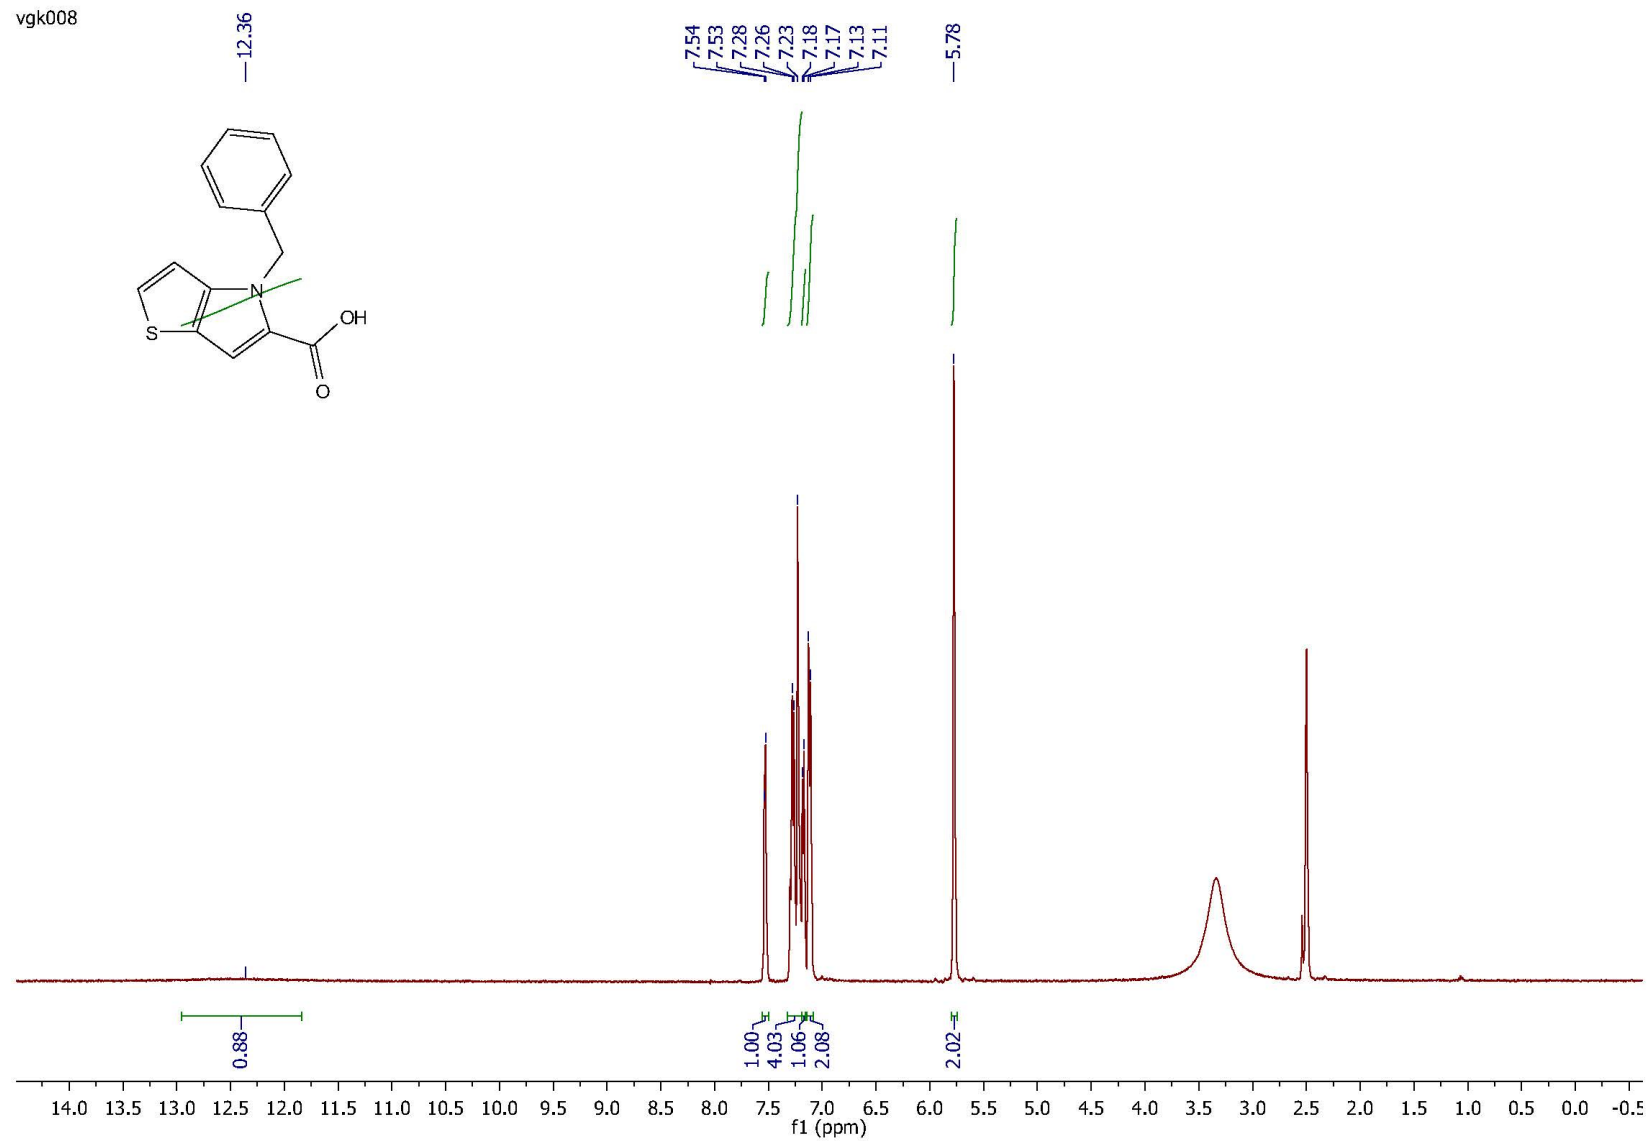

**Figure S8.**  $^1\text{H}$  NMR spectrum of 4-Benzyl-4H-thieno[3,2-b]pyrrole-5-carboxylic acid (**4c**).

vgk009

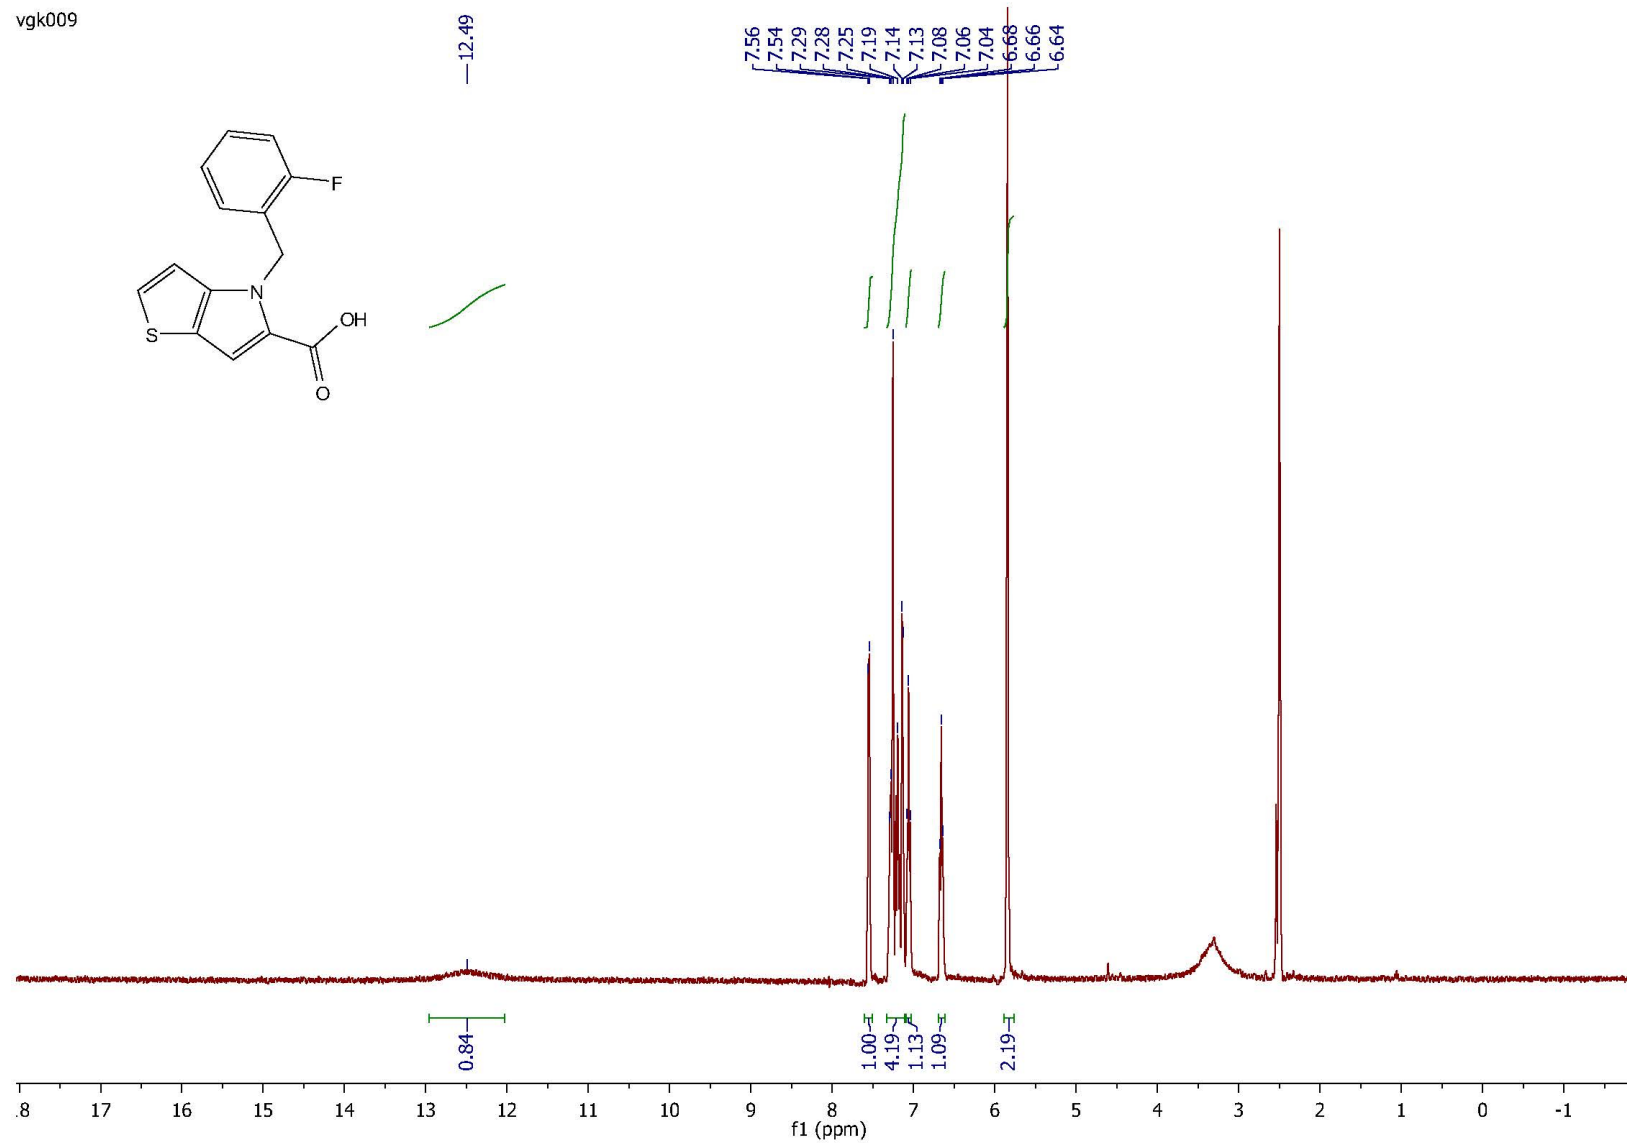

**Figure S9.** <sup>1</sup>H NMR spectrum of 4-(2-Fluorobenzyl)-4H-thieno[3,2-b]pyrrole-5-carboxylic acid (**4d**).

vgk010

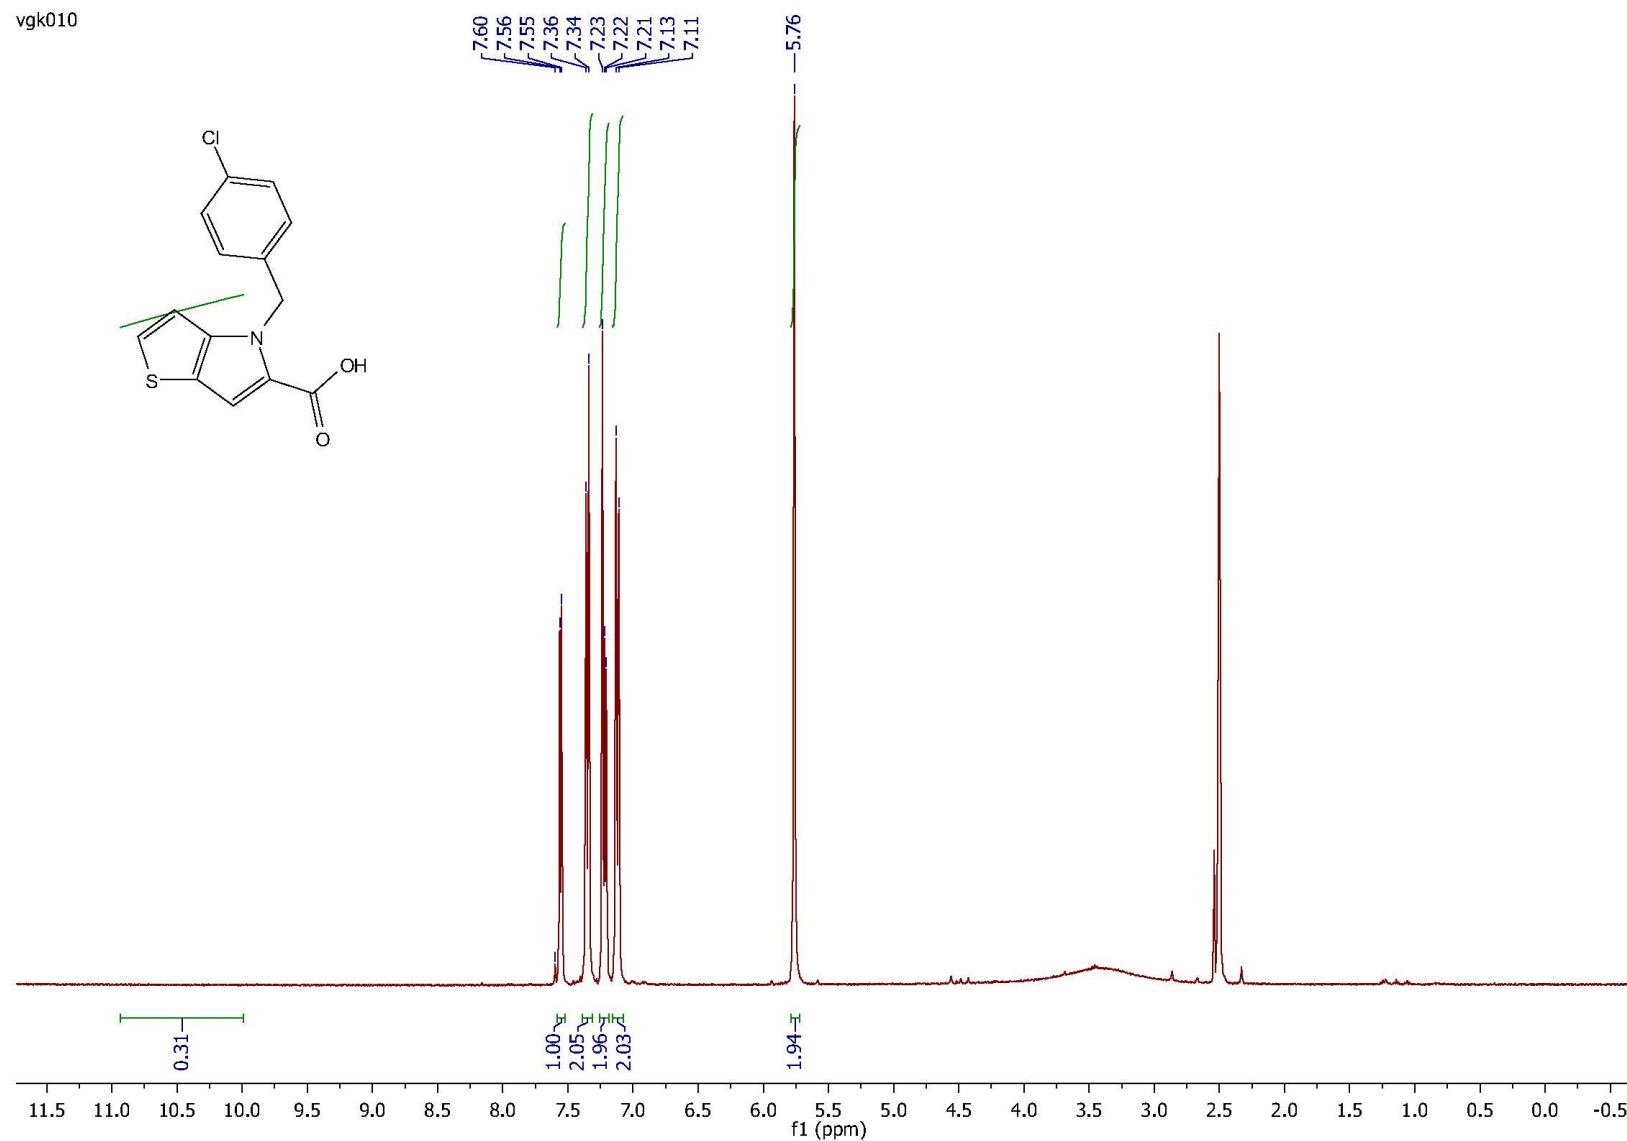

**Figure S10.** <sup>1</sup>H NMR spectrum of 4-(4-Chlorobenzyl)-4H-thieno[3,2-b]pyrrole-5-carboxylic acid (**4f**).

vgk011/1

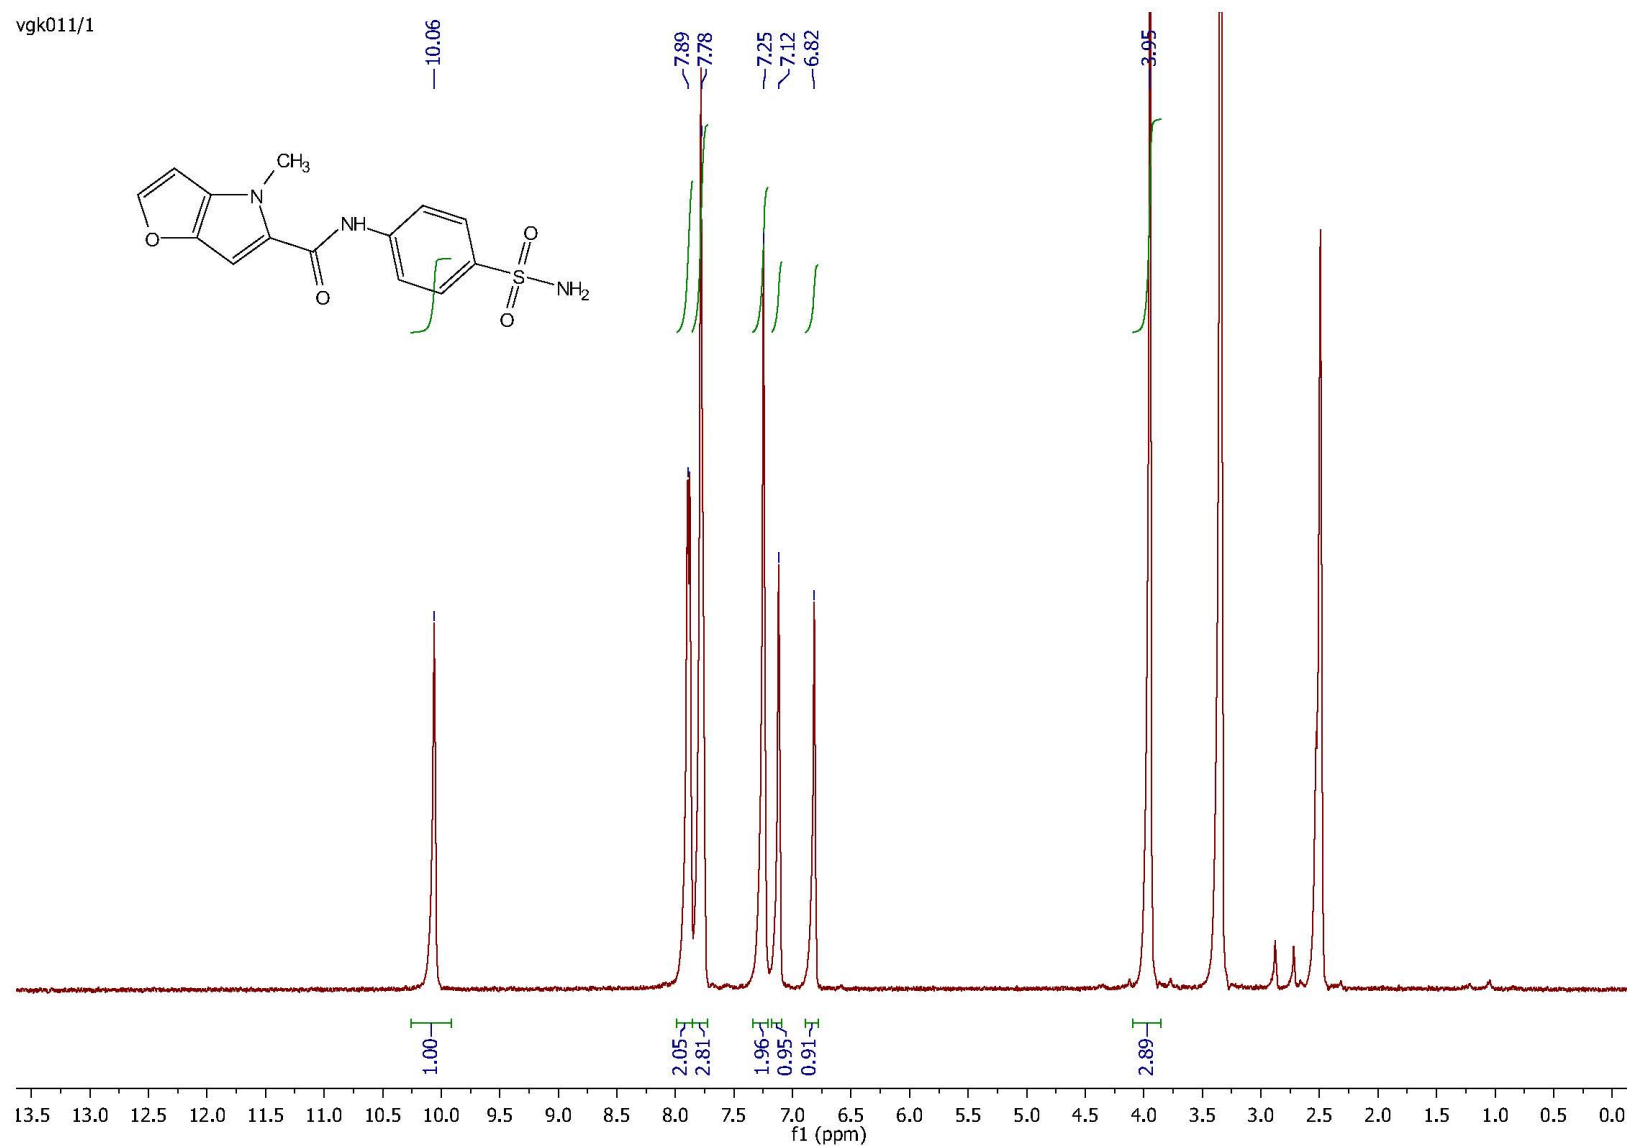

**Figure S11.** <sup>1</sup>H NMR spectrum of *N*-[4-(Aminosulfonyl)phenyl]-4-methyl-4H-furo[3,2-*b*]pyrrole-5-carboxamide (**7a**).



vgk011\_C13/1

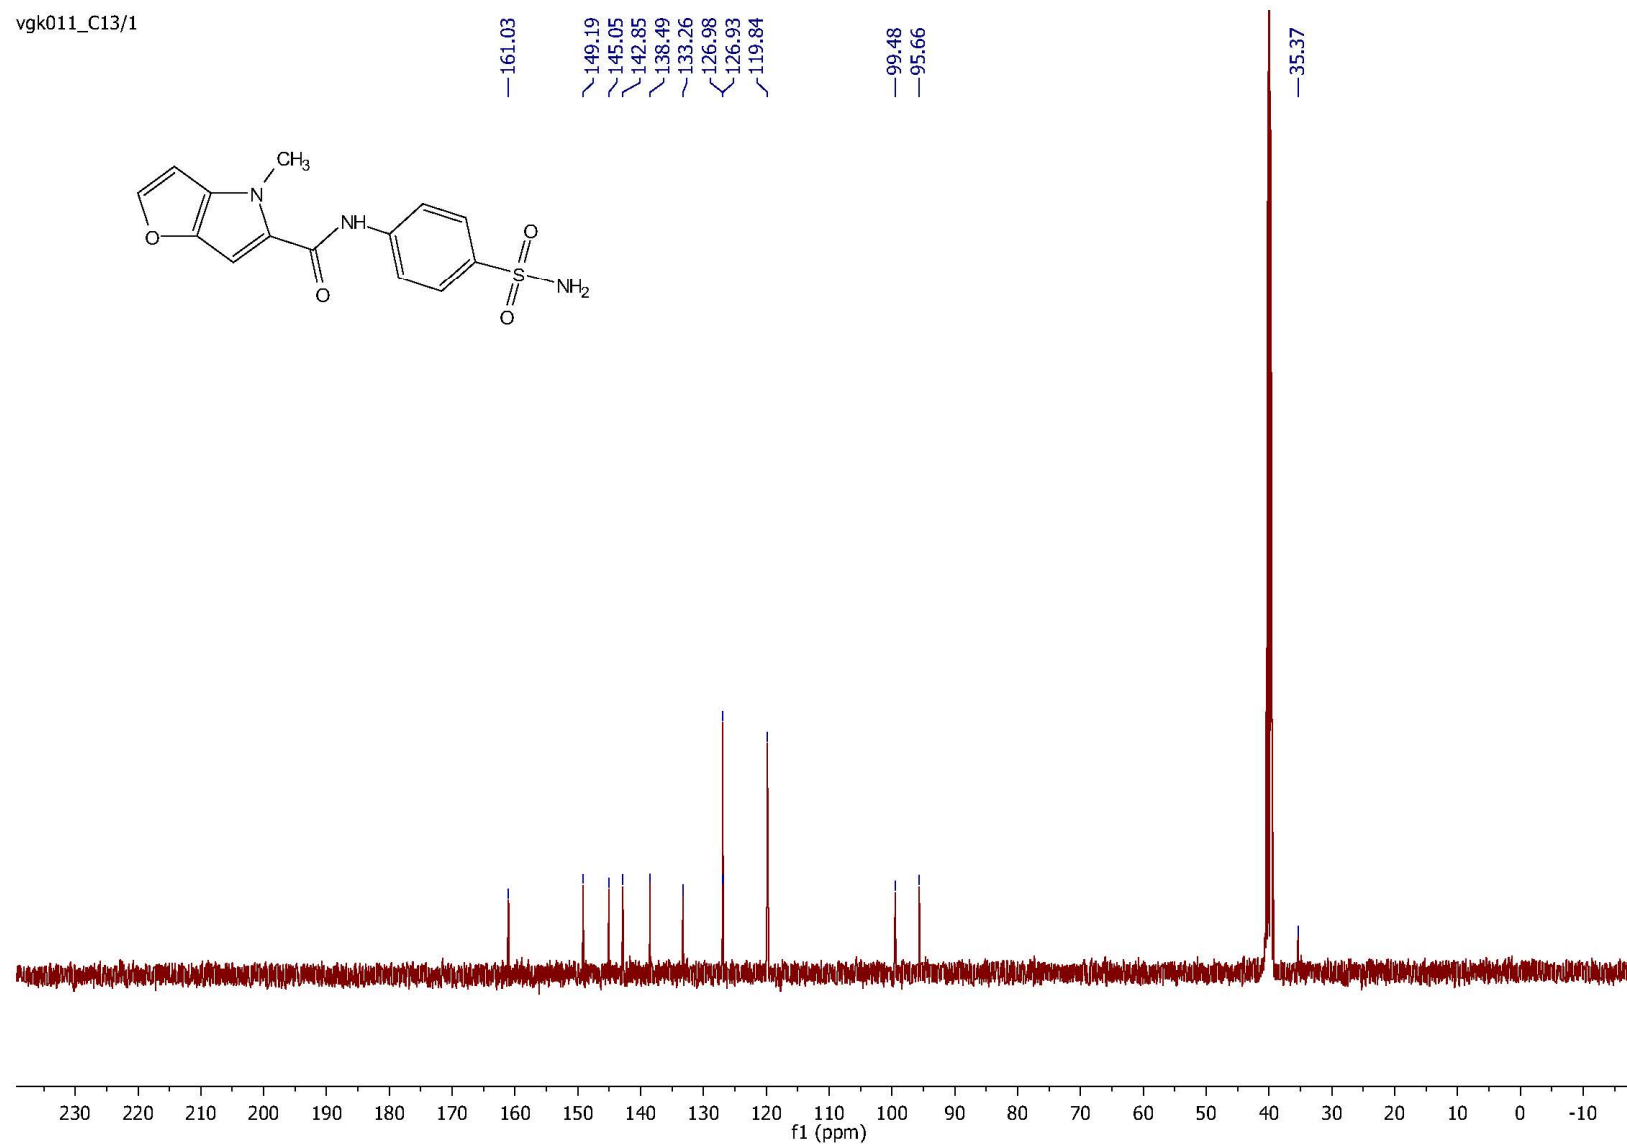

**Figure S12.** <sup>13</sup>C NMR spectrum of *N*-[4-(Aminosulfonyl)phenyl]-4-methyl-4*H*-furo[3,2-*b*]pyrrole-5-carboxamide (7a).

MaxPeak: 100.00%  
Ret\_Time: 1.070 min

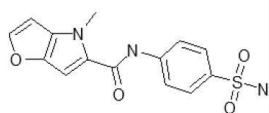

| Mol Wt     |       |        |
|------------|-------|--------|
| Exact Mass |       |        |
| #          | Time  | Area%  |
| 1          | 1.070 | 100.00 |

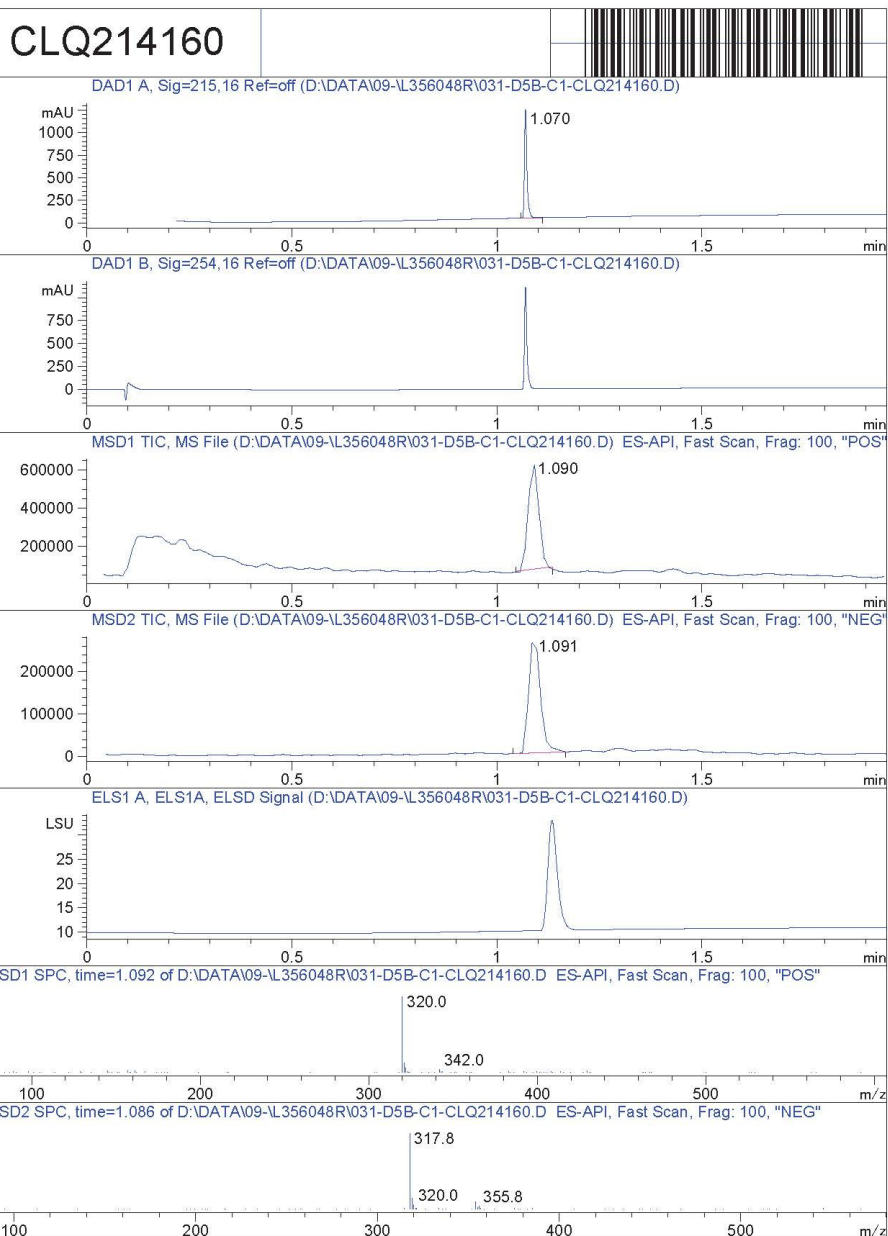

Inj.Date 4/9/2021

LB

Acq. Method C:\Users\ -> ->

**Figure S13.** LCMS spectrum of *N*-[4-(Aminosulfonyl)phenyl]-4-methyl-4*H*-furo[3,2-*b*]pyrrole-5-carboxamide (**7a**).

vgk012

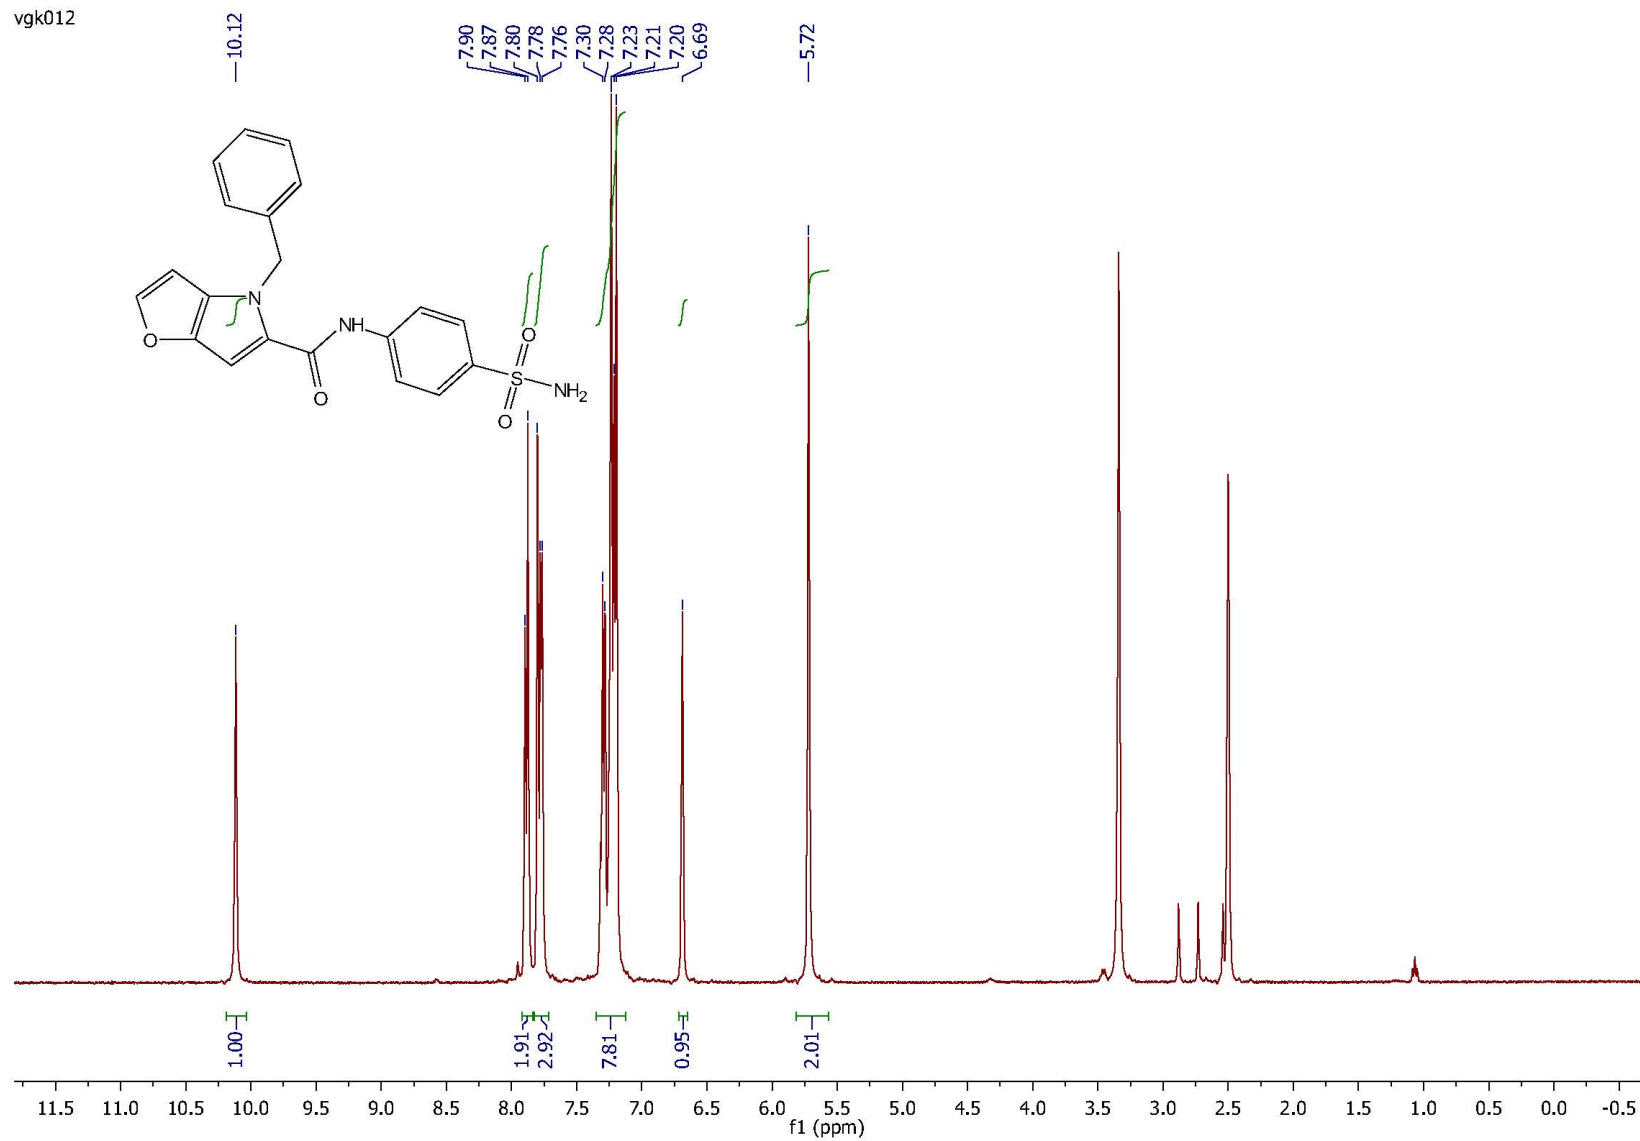

**Figure S14.**  $^1\text{H}$  NMR spectrum of *N*-[4-(Aminosulfonyl)phenyl]-4-benzyl-4*H*-furo[3,2-*b*]pyrrole-5-carboxamide (**7c**).

vgk012\_\_\_13C

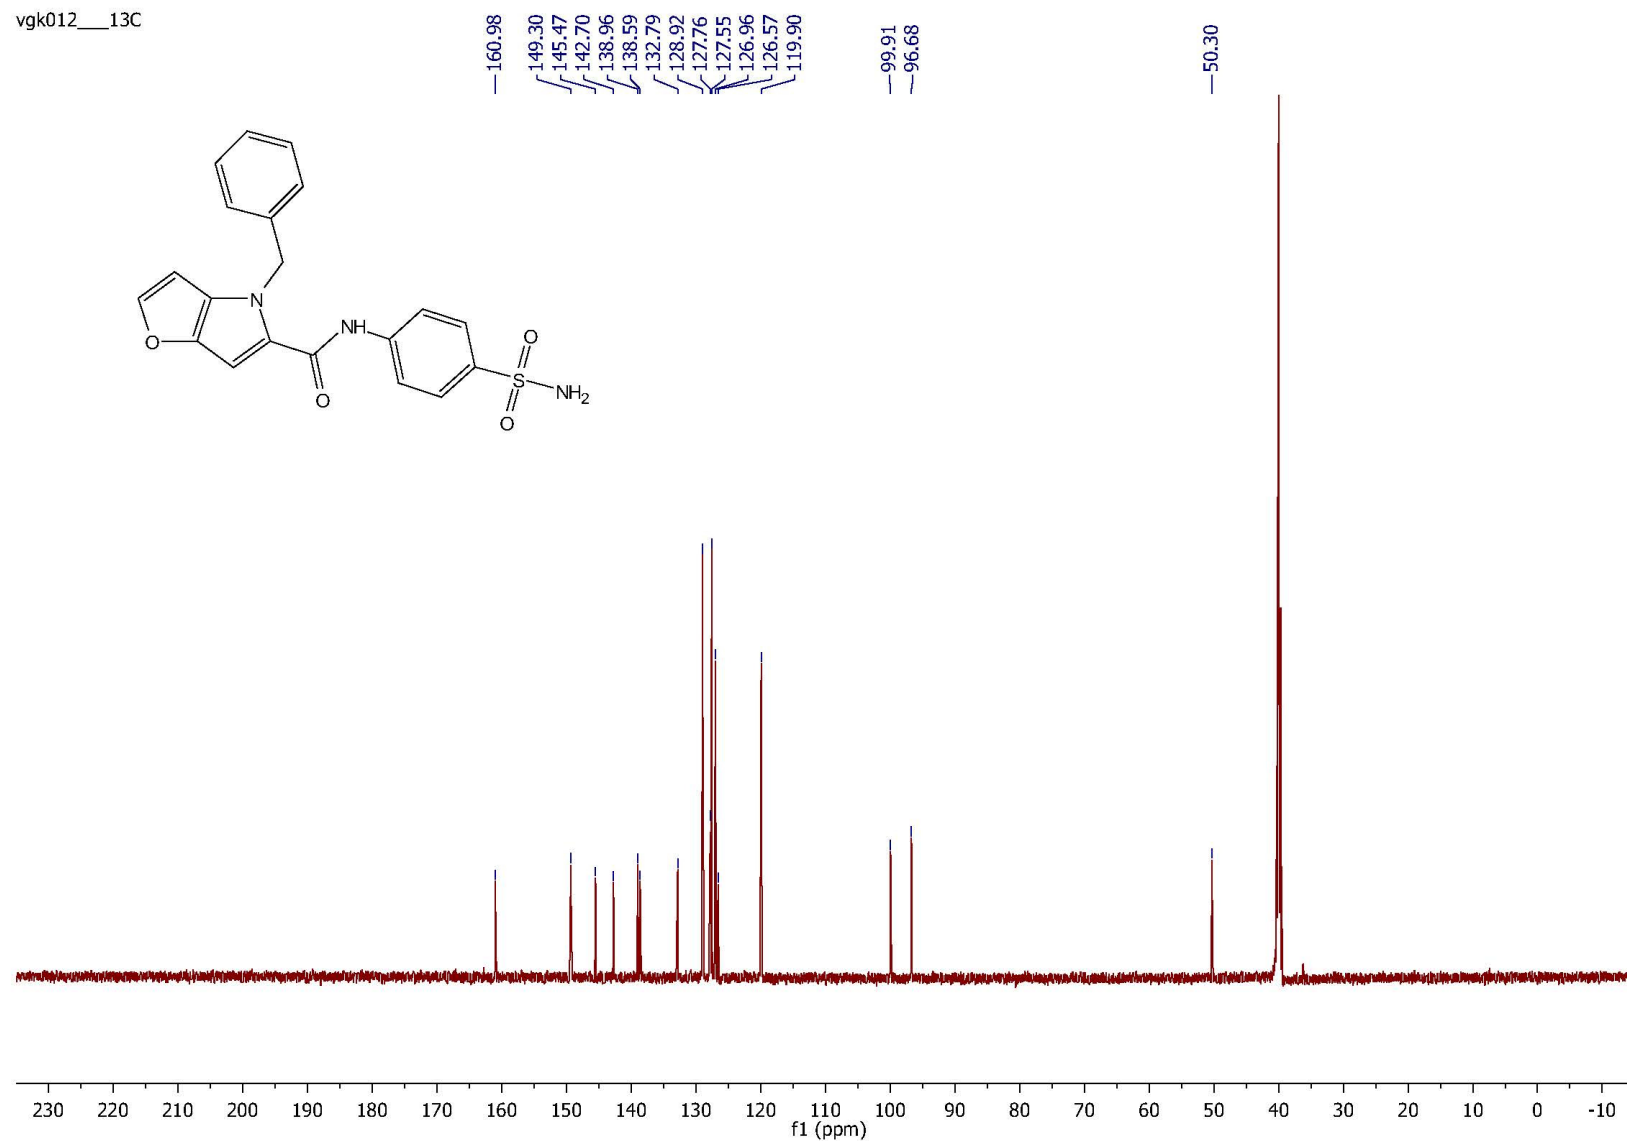

**Figure S15.** <sup>13</sup>C NMR spectrum of *N*-[4-(Aminosulfonyl)phenyl]-4-benzyl-4H-furo[3,2-*b*]pyrrole-5-carboxamide (7c).

MaxPeak: 93.29%  
Ret\_Time: 1.308 min

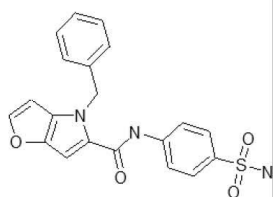

Mol Wt 0

Exact Mass

| # | Time  | Area% |
|---|-------|-------|
| 1 | 1.240 | 6.71  |
| 2 | 1.308 | 93.29 |

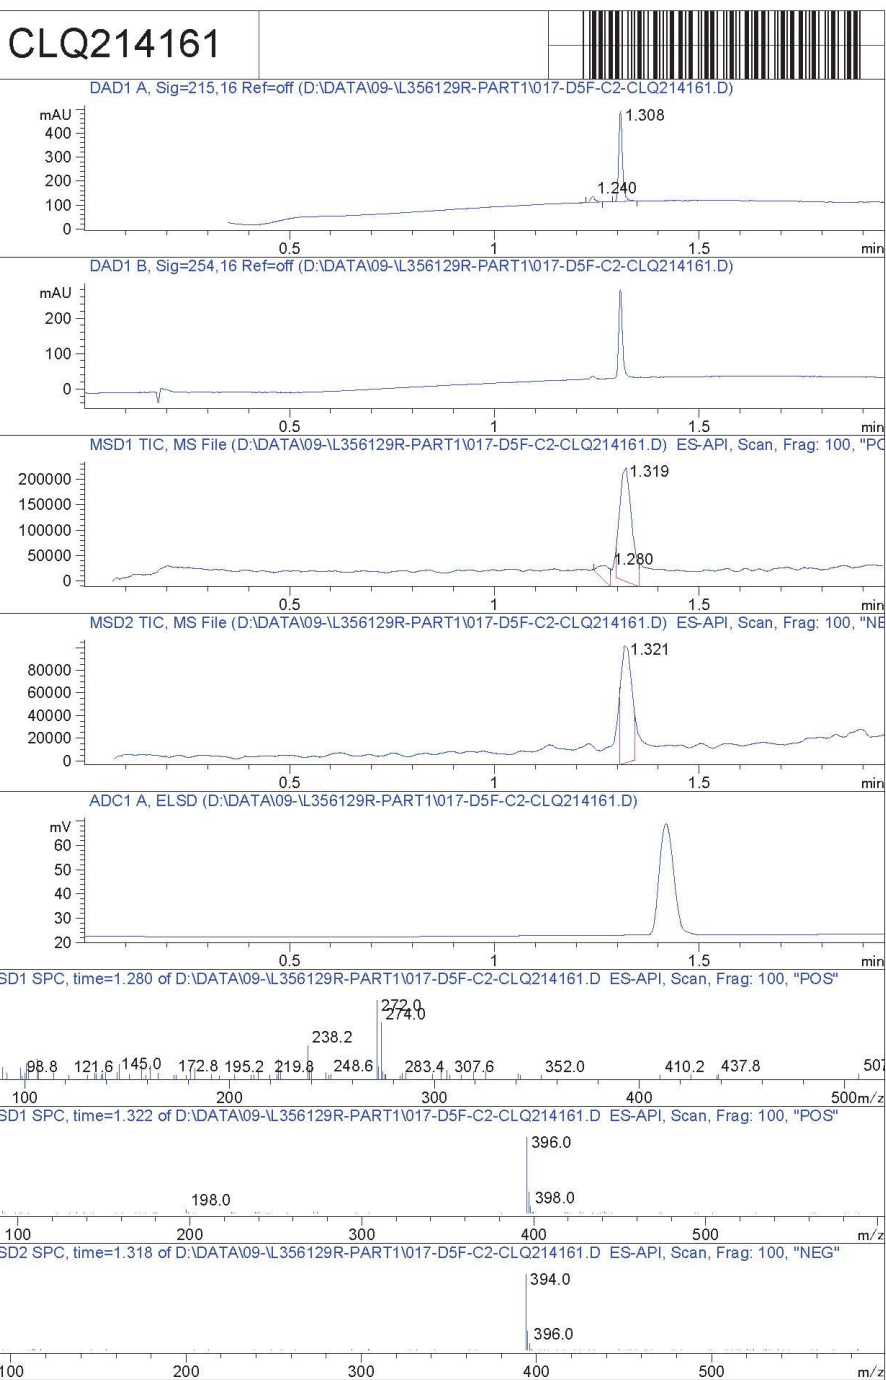

Inj.Date 4/9/2021

LB

-12-

Acq. Method C:\Chem32\> ->

**Figure S16.** LCMS spectrum of *N*-[4-(Aminosulfonyl)phenyl]-4-benzyl-4H-furo[3,2-*b*]pyrrole-5-carboxamide (**7c**).

vgk013

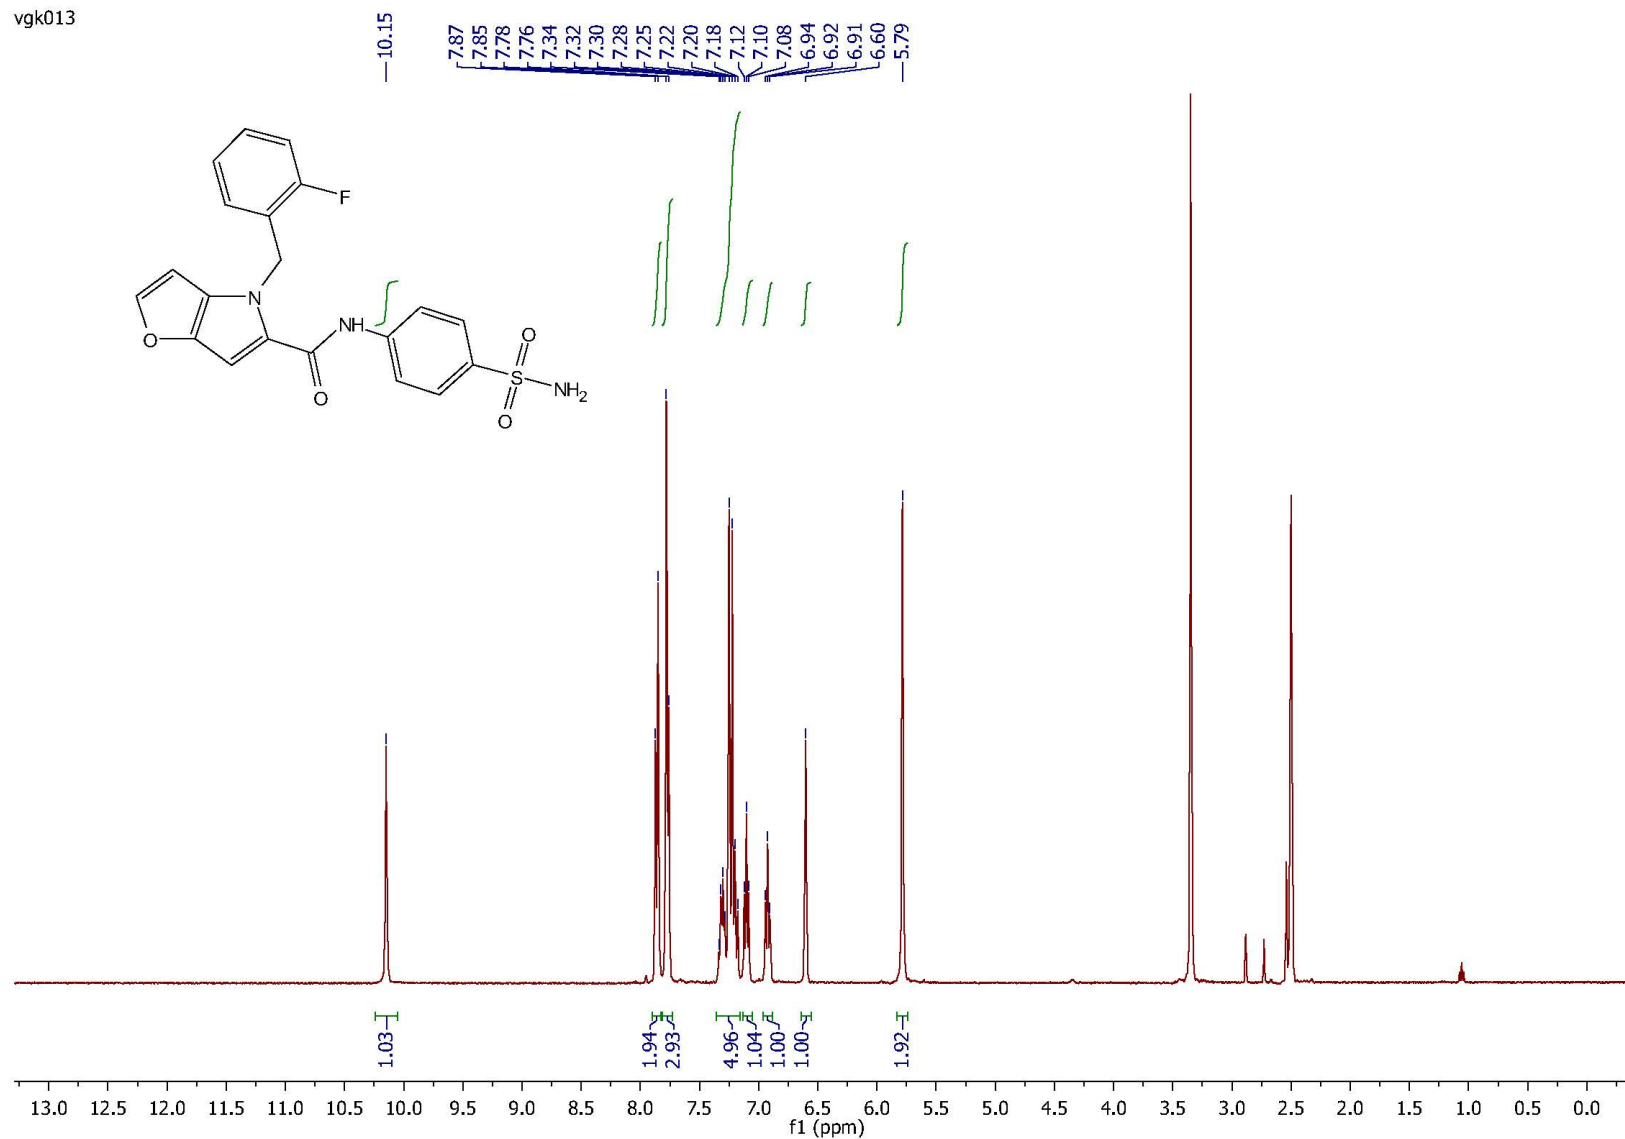

**Figure S17.** <sup>1</sup>H NMR spectrum of *N*-[4-(Aminosulfonyl)phenyl]-4-(2-fluorobenzyl)-4*H*-furo[3,2-*b*]pyrrole-5-carboxamide (**7d**).

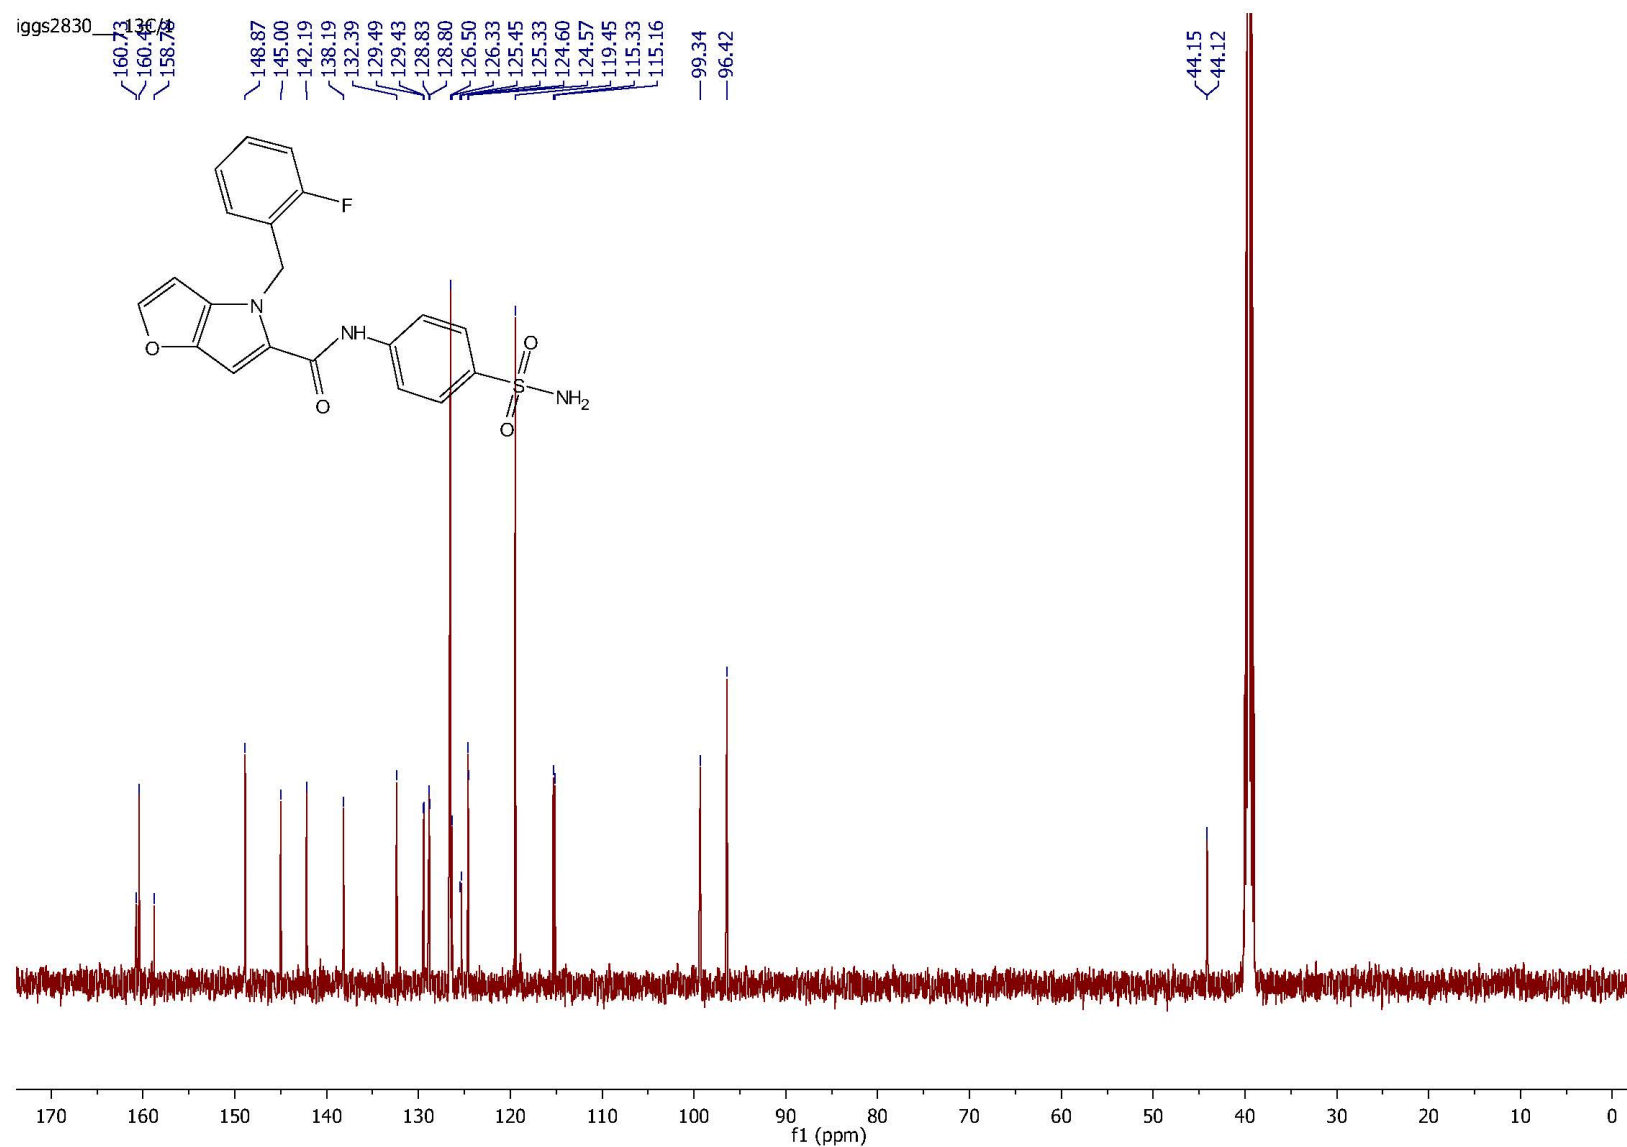

**Figure S18.** <sup>13</sup>C NMR spectrum of *N*-[4-(Aminosulfonyl)phenyl]-4-(2-fluorobenzyl)-4*H*-furo[3,2-*b*]pyrrole-5-carboxamide (**7d**).

MaxPeak: 100.00%  
Ret\_Time: 1.319 min

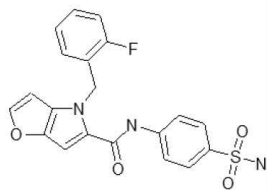

Mol Wt 0

Exact Mass

| # | Time  | Area%  |
|---|-------|--------|
| 1 | 1.319 | 100.00 |

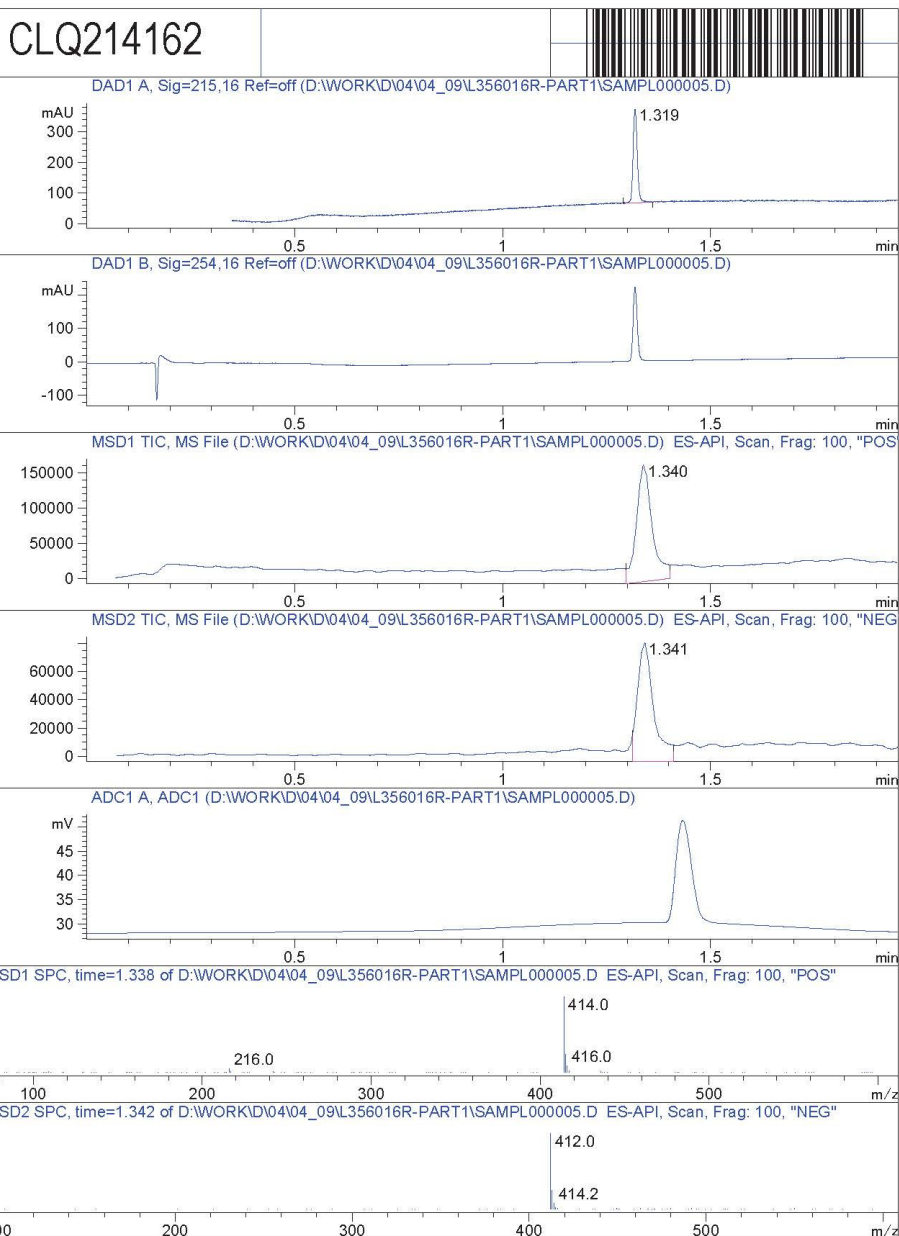

Inj.Date 4/9/2021

K

- 4 -

Acq. Method C:\CHEM32\ -> ->

**Figure S19.** LCMS spectrum of *N*-[4-(Aminosulfonyl)phenyl]-4-(2-fluorobenzyl)-4H-furo[3,2-*b*]pyrrole-5-carboxamide (**7d**).



vgk014

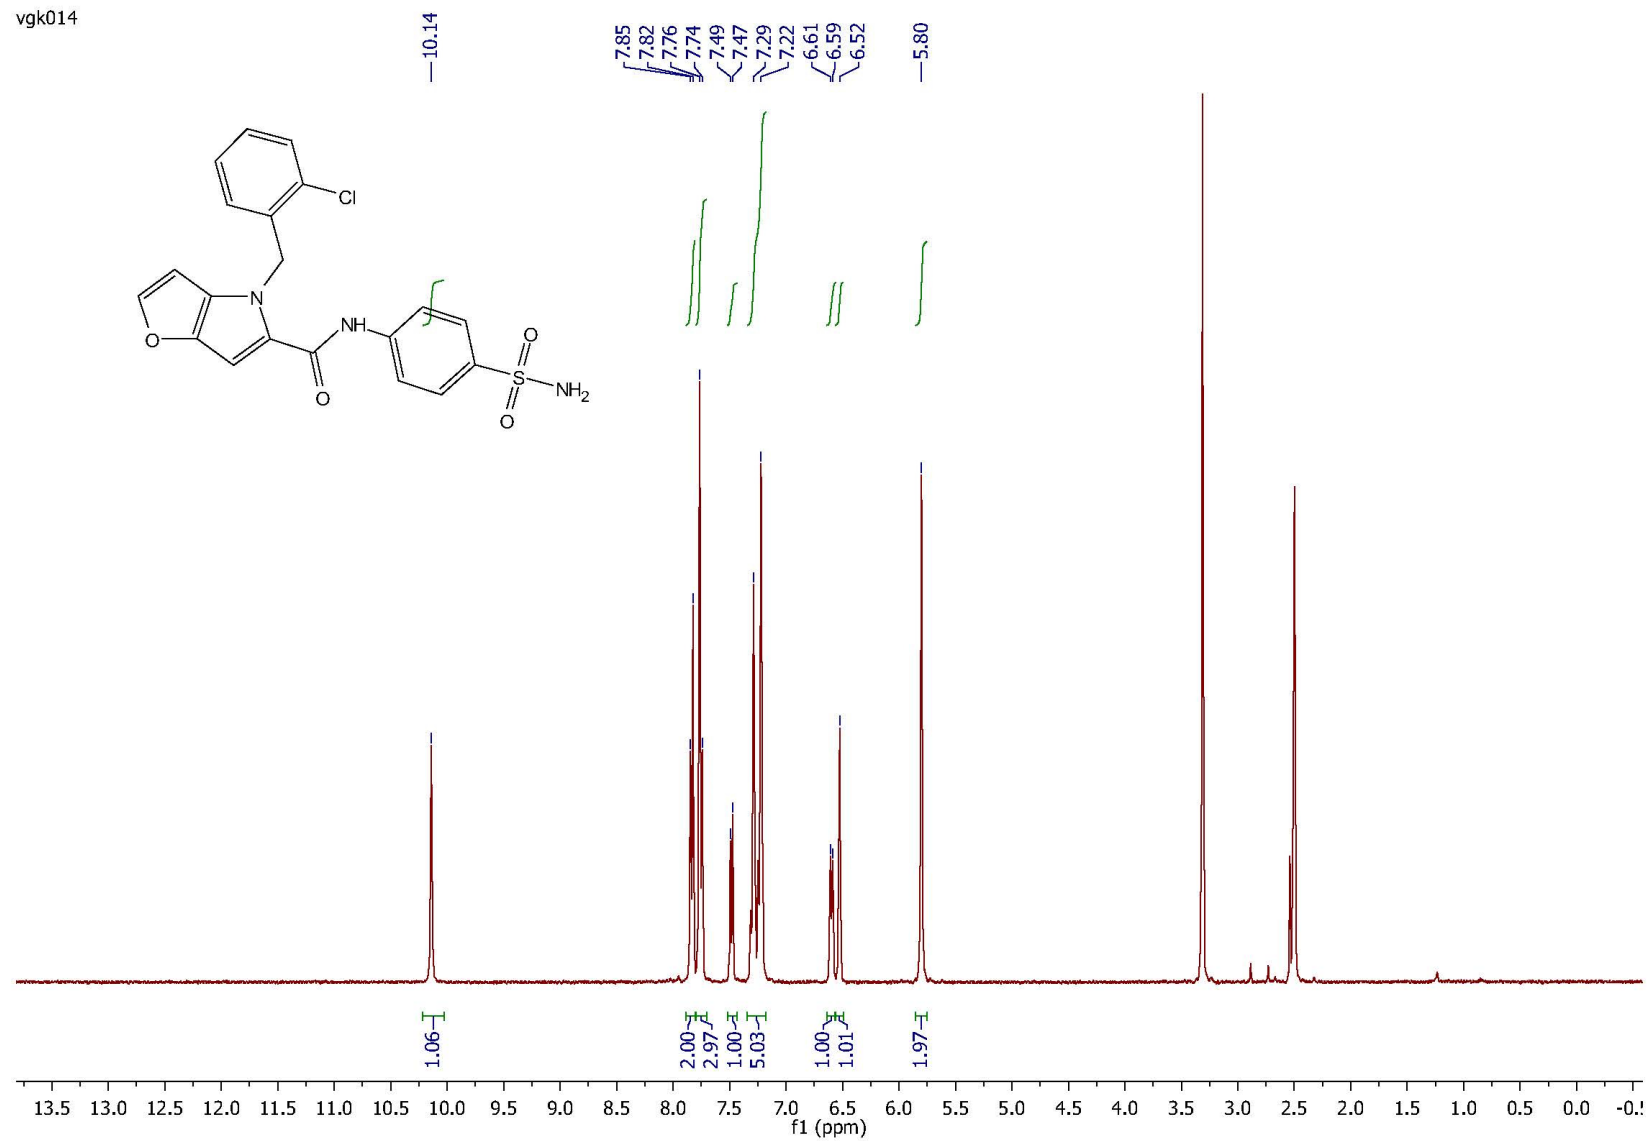

**Figure S20.** <sup>1</sup>H NMR spectrum of *N*-[4-(Aminosulfonyl)phenyl]-4-(2-chlorobenzyl)-4*H*-furo[3,2-*b*]pyrrole-5-carboxamide (**7e**).

vgk014\_\_13C

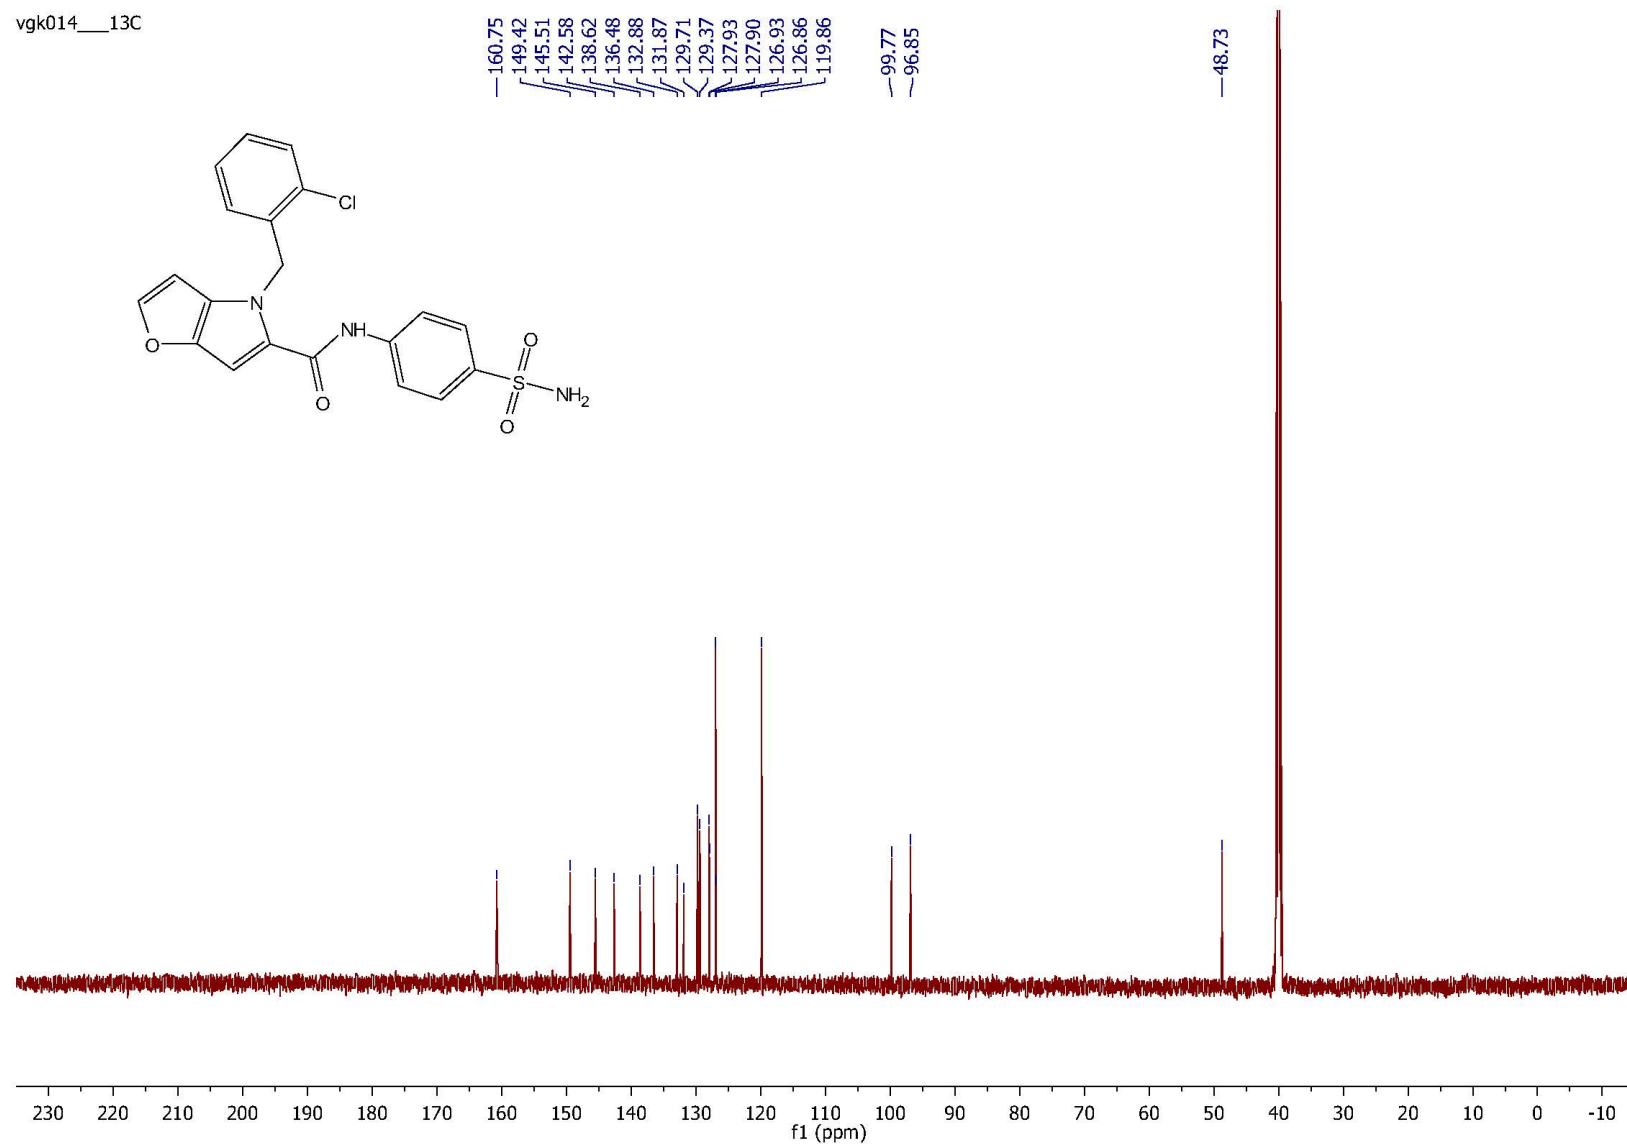

**Figure S21.** <sup>13</sup>C NMR spectrum of *N*-[4-(Aminosulfonyl)phenyl]-4-(2-chlorobenzyl)-4*H*-furo[3,2-*b*]pyrrole-5-carboxamide (7e).

MaxPeak: 100.00%  
Ret\_Time: 1.363 min

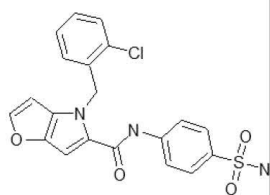

Mol Wt  
Exact Mass

| # | Time  | Area%  |
|---|-------|--------|
| 1 | 1.363 | 100.00 |

CLQ214170

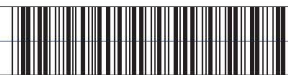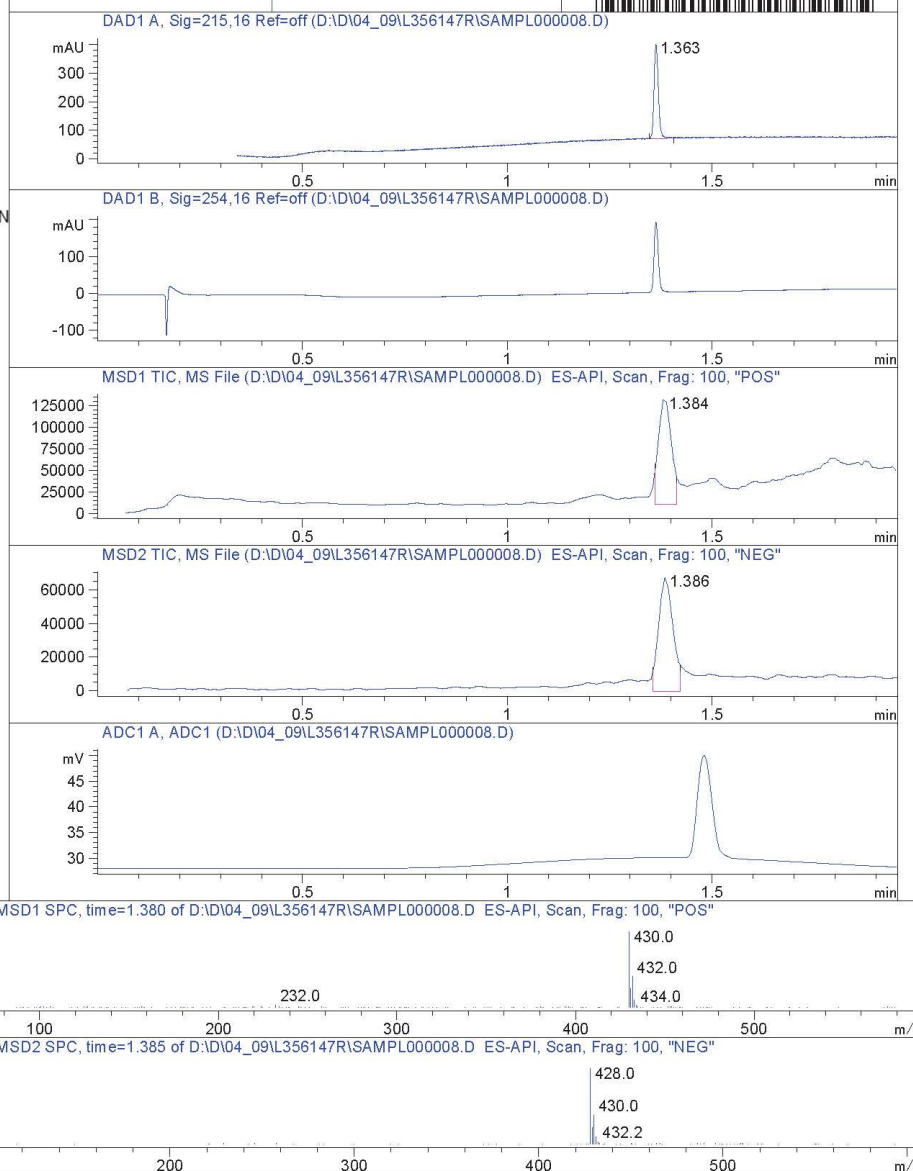

Inj.Date 4/9/2021

N

- 4 -

Acq. Method C:\CHEM32\> ->

**Figure S22.** LCMS spectrum of *N*-[4-(Aminosulfonyl)phenyl]-4-(2-chlorobenzyl)-4*H*-furo[3,2-*b*]pyrrole-5-carboxamide (**7e**).

vgk015

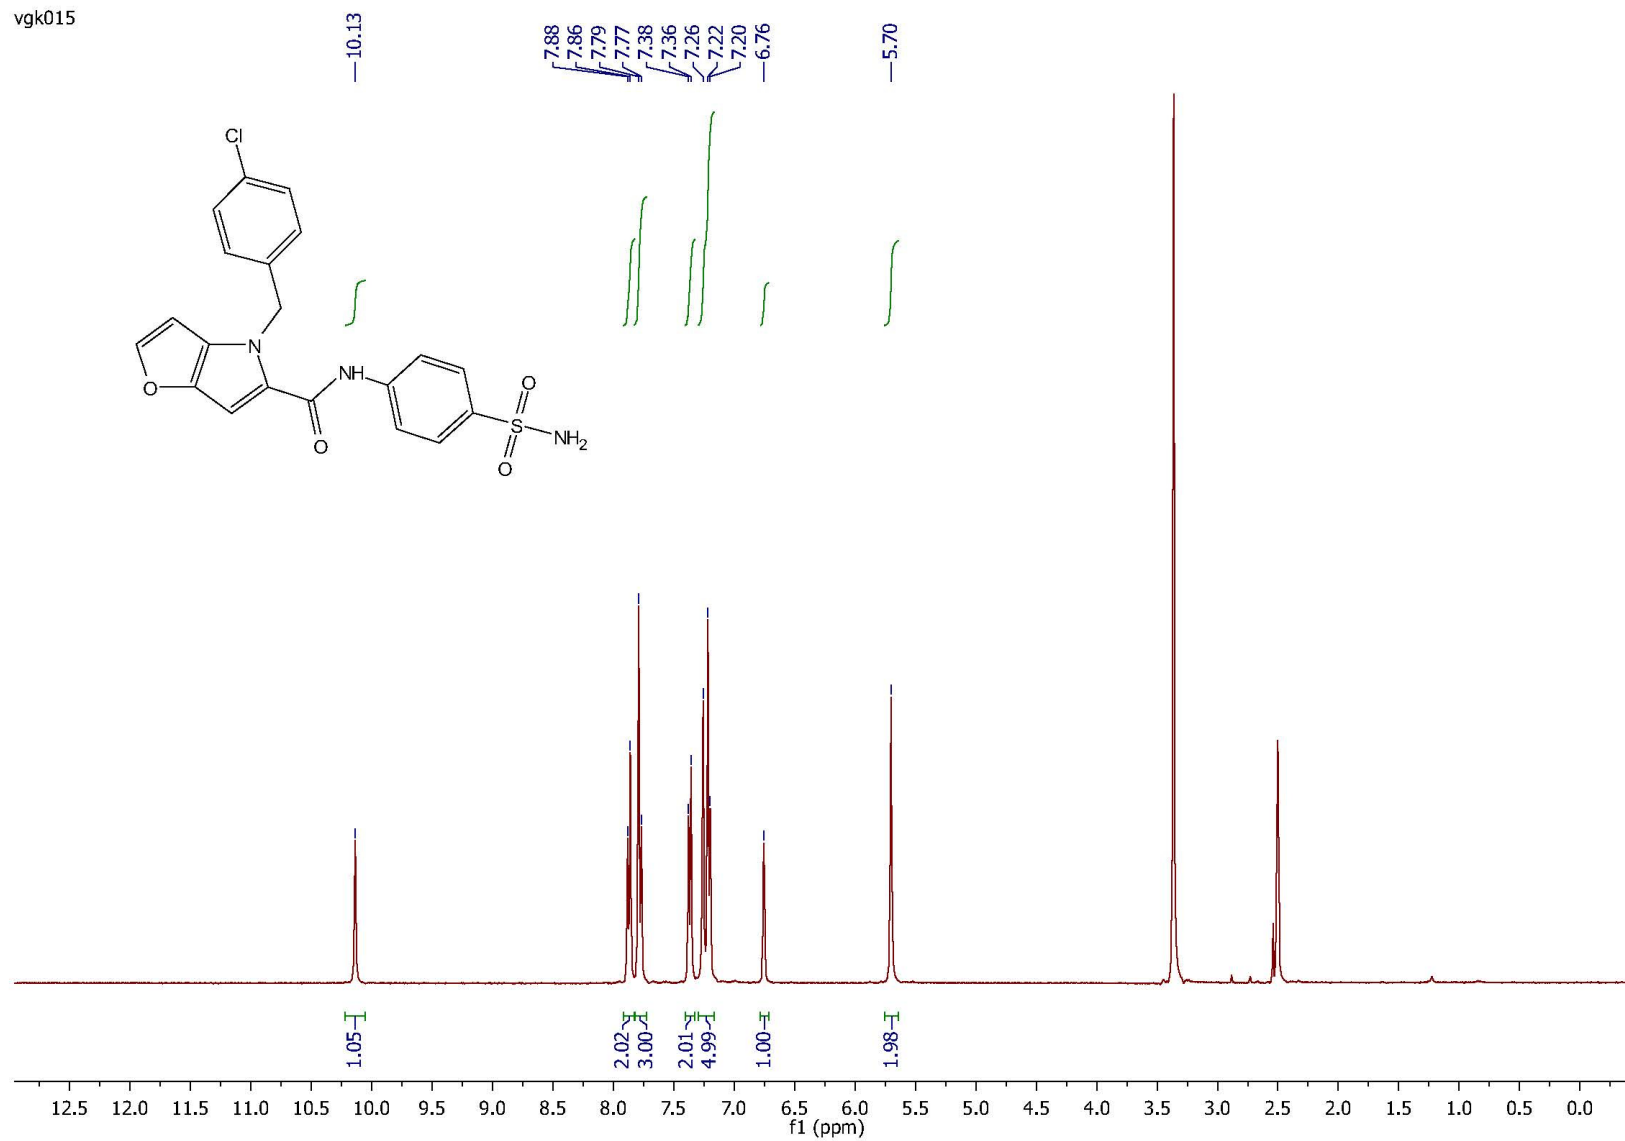

**Figure S23.** <sup>1</sup>H NMR spectrum of *N*-[4-(Aminosulfonyl)phenyl]-4-(4-chlorobenzyl)-4H-furo[3,2-*b*]pyrrole-5-carboxamide (**7f**).

vgk015\_\_13C/1

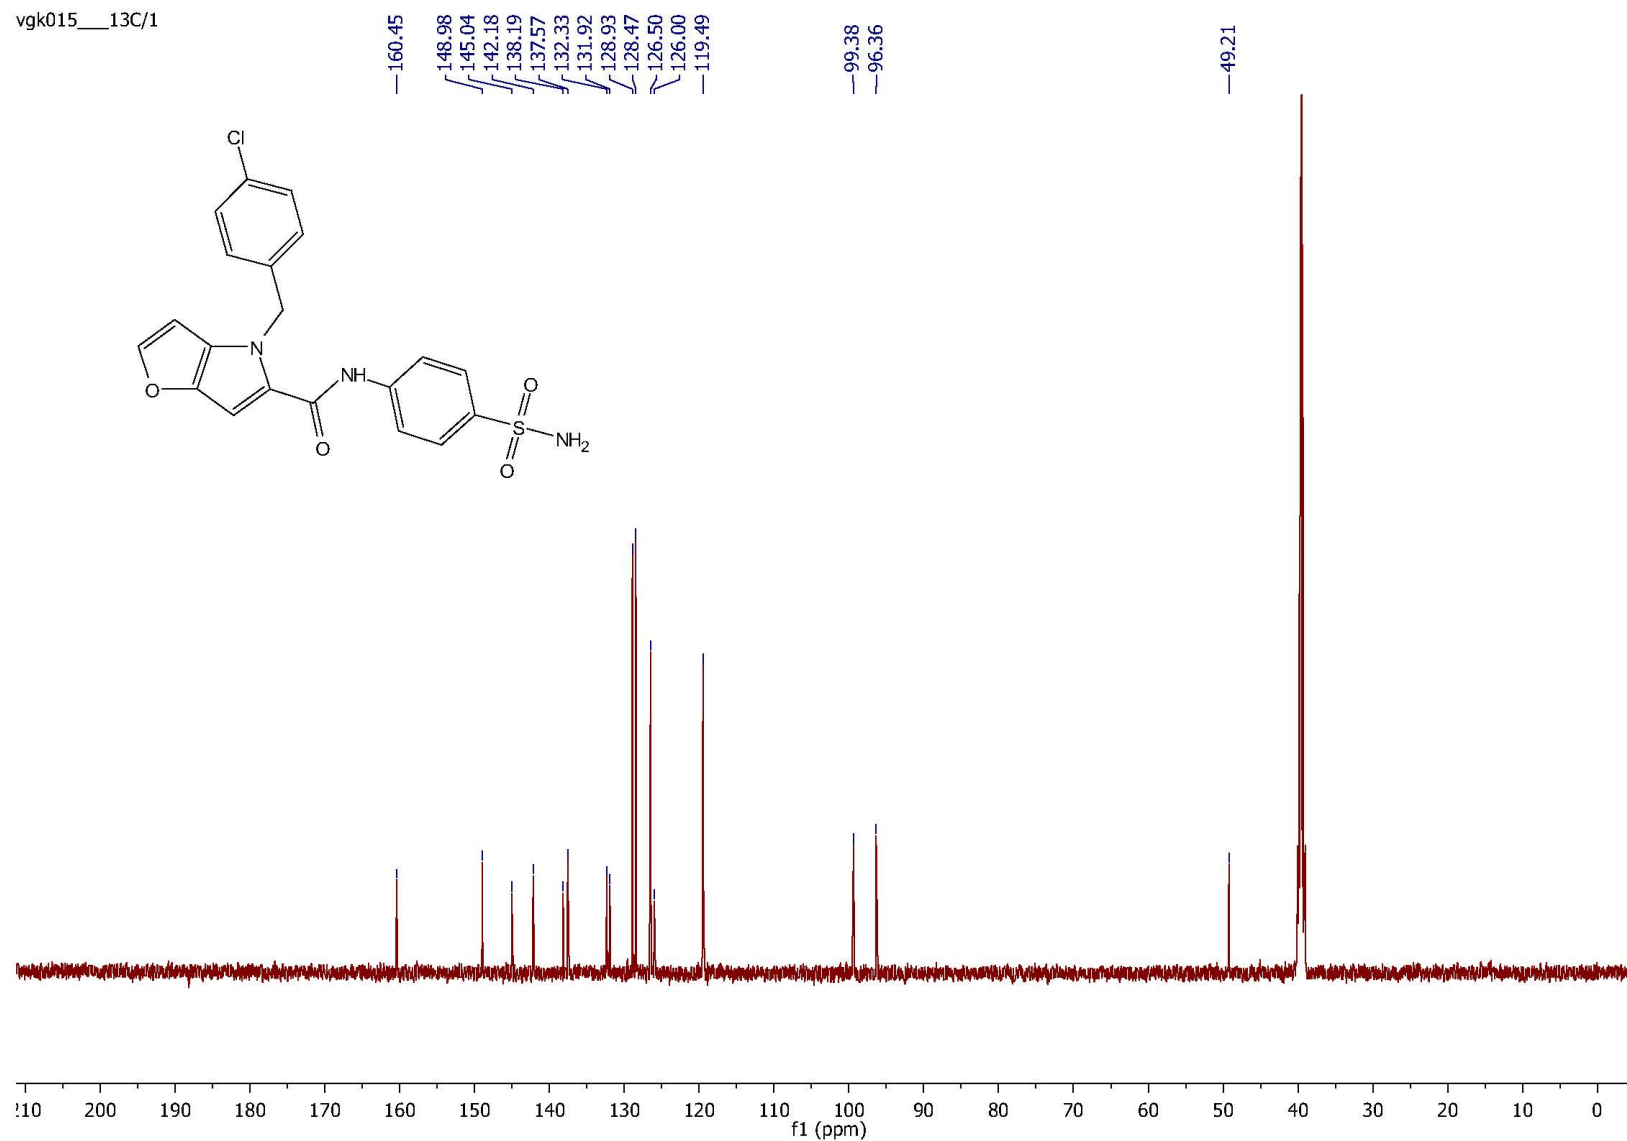

**Figure S24.** <sup>13</sup>C NMR spectrum of *N*-[4-(Aminosulfonyl)phenyl]-4-(4-chlorobenzyl)-4*H*-furo[3,2-*b*]pyrrole-5-carboxamide (7f).

MaxPeak: 100.00%  
Ret\_Time: 1.363 min

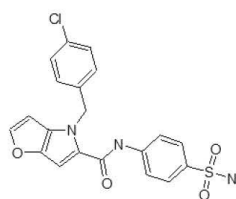

**Mol Wt** **0**

**Exact Mass**

| # | Time  | Area%  |
|---|-------|--------|
| 1 | 1.363 | 100.00 |

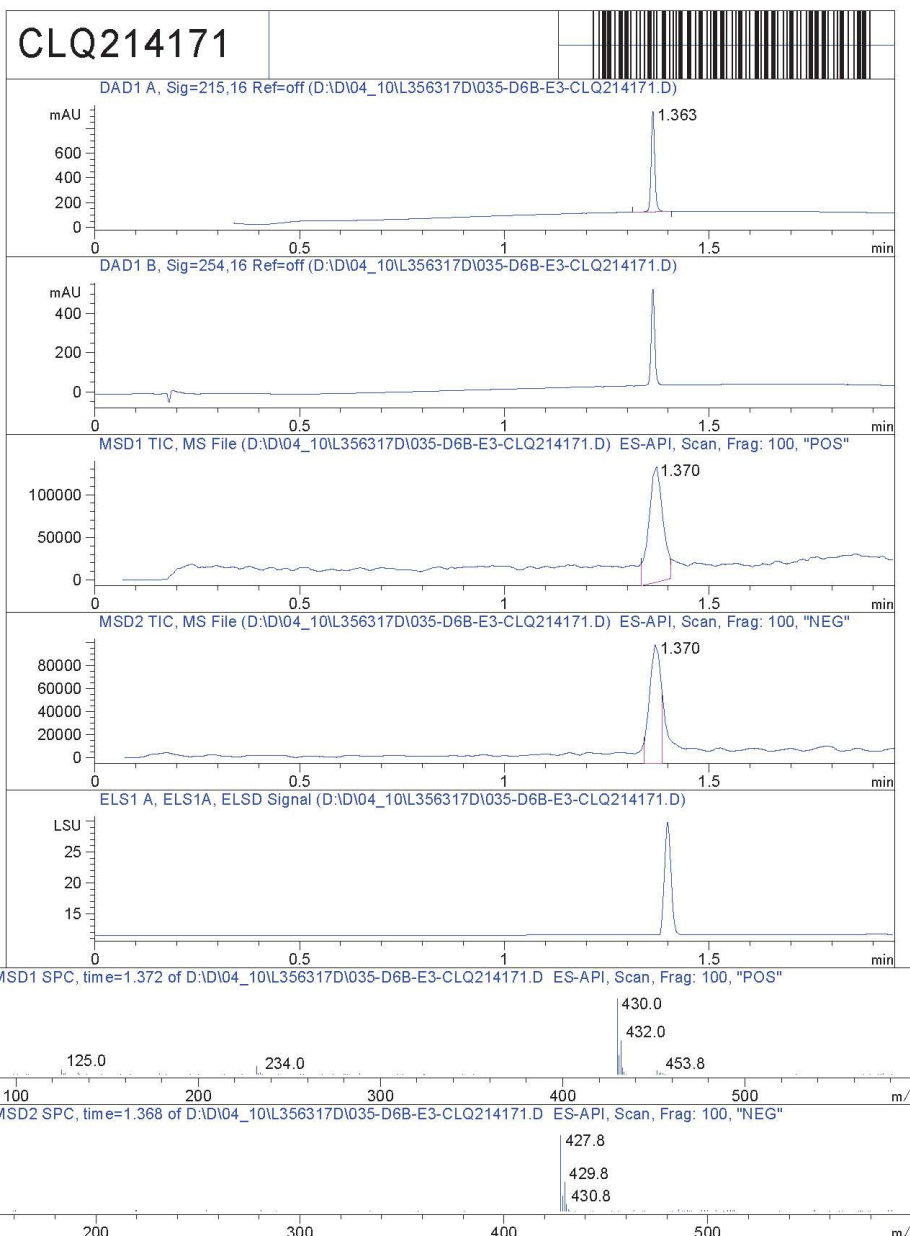

Inj.Date 4/9/2021

N

-15-

Acq. Method C:\Chem32\> ->

**Figure S25.** LCMS spectrum of *N*-[4-(Aminosulfonyl)phenyl]-4-(4-chlorobenzyl)-4*H*-furo[3,2-*b*]pyrrole-5-carboxamide (**7f**).

vgk016

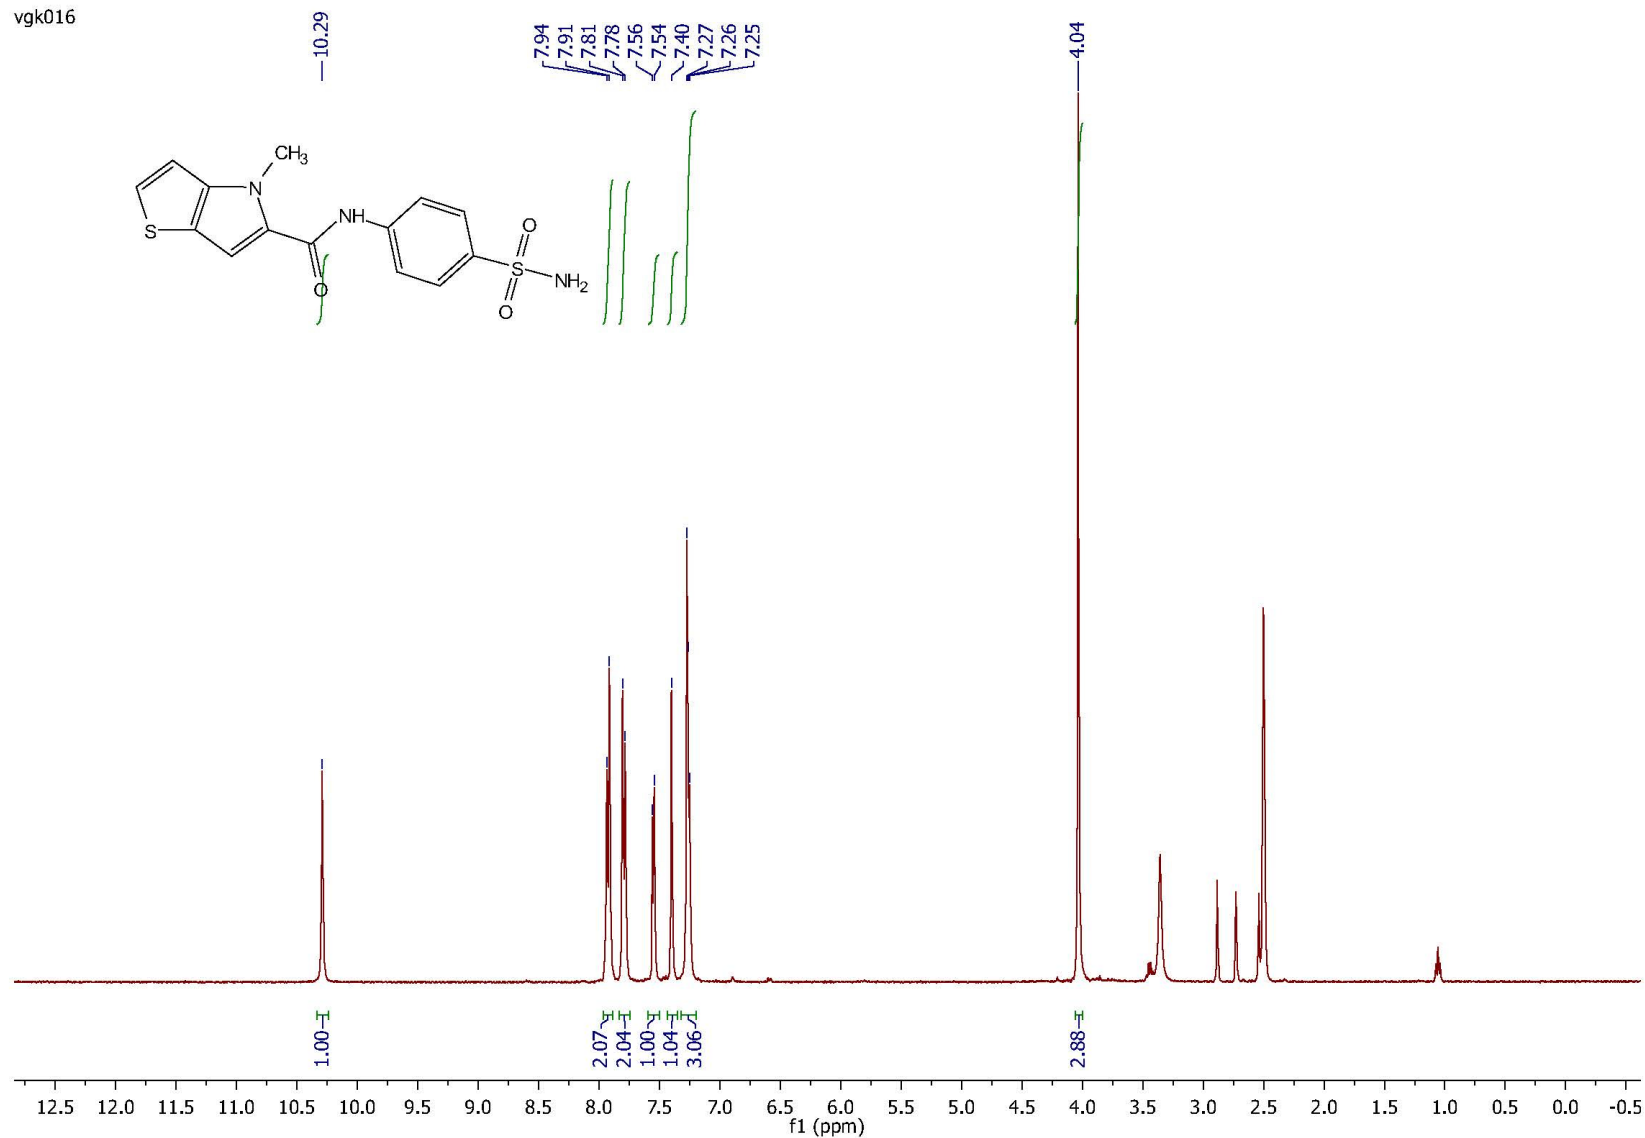

**Figure S26.** <sup>1</sup>H NMR spectrum of *N*-[4-(Aminosulfonyl)phenyl]-4-methyl-4*H*-thieno[3,2-*b*]pyrrole-5-carboxamide (**8a**).

vgk016\_C13/1

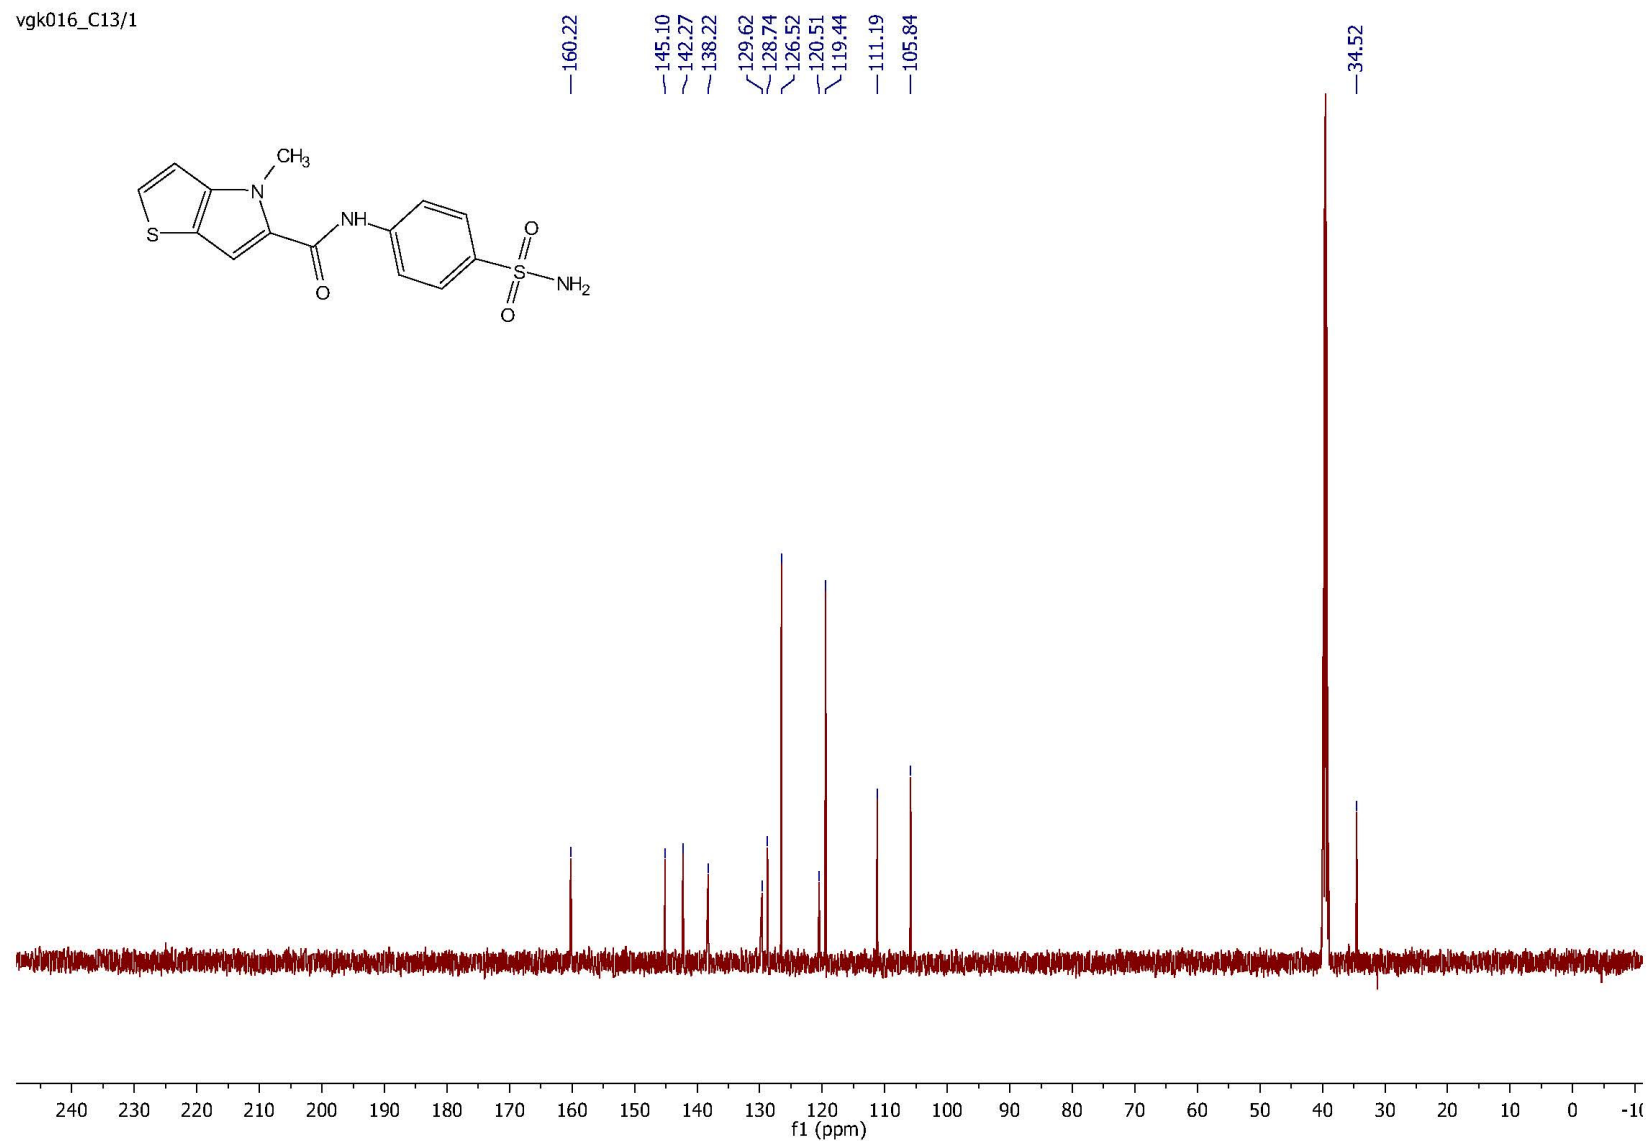

**Figure S27.** <sup>13</sup>C NMR spectrum of *N*-[4-(Aminosulfonyl)phenyl]-4-methyl-4*H*-thieno[3,2-*b*]pyrrole-5-carboxamide (**8a**).



MaxPeak: 100.00%  
Ret\_Time: 1.091 min

CLQ214173

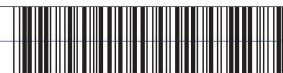

Mol Wt  
Exact Mass

| # | Time  | Area%  |
|---|-------|--------|
| 1 | 1.091 | 100.00 |

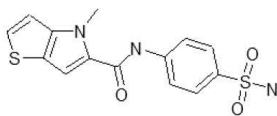

0

DAD1 A, Sig=215,10 Ref=off (D:\DATE\APR\1604\1357480D\SAMPL010.D)

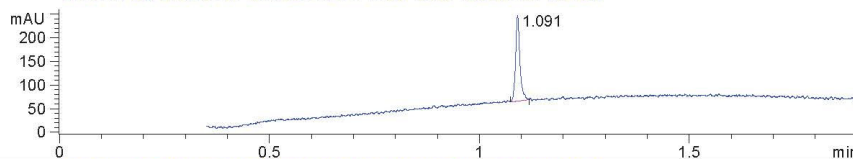

DAD1 B, Sig=254,10 Ref=off (D:\DATE\APR\1604\1357480D\SAMPL010.D)

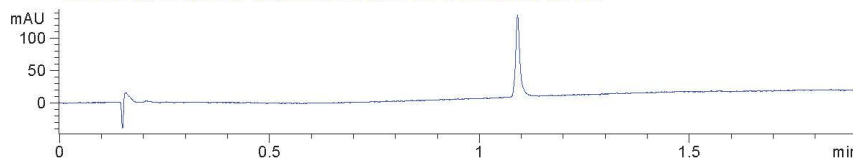

MSD1 TIC, MS File (D:\DATE\APR\1604\1357480D\SAMPL010.D) API-ES, Scan, Frag: 120, "Pos"

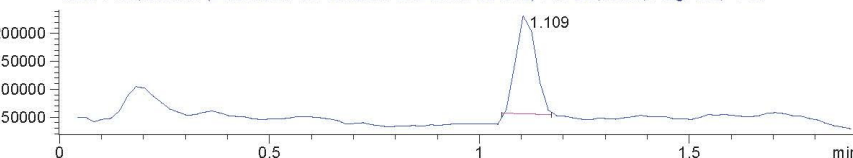

MSD2 TIC, MS File (D:\DATE\APR\1604\1357480D\SAMPL010.D) , Scan, Frag: 120, "Neg"

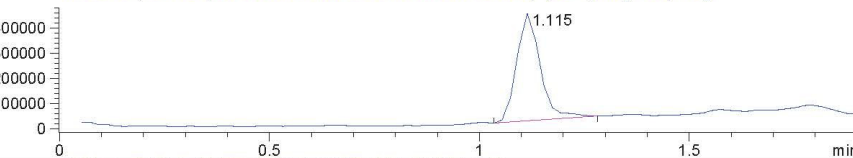

ADC1 A, ELSD (D:\DATE\APR\1604\1357480D\SAMPL010.D)

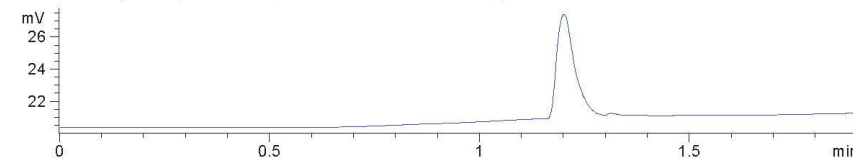

RT 1.109

\*MSD1 SPC, time=1.104 of D:\DATE\APR\1604\1357480D\SAMPL010.D API-ES, Scan, Frag: 120, "Pos"

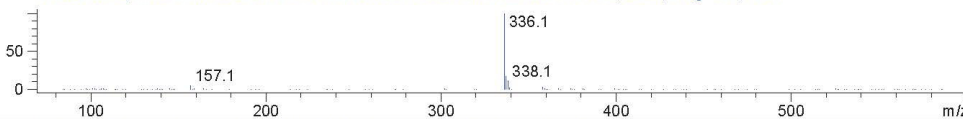

RT 1.115

\*MSD2 SPC, time=1.114 of D:\DATE\APR\1604\1357480D\SAMPL010.D , Scan, Frag: 120, "Neg"

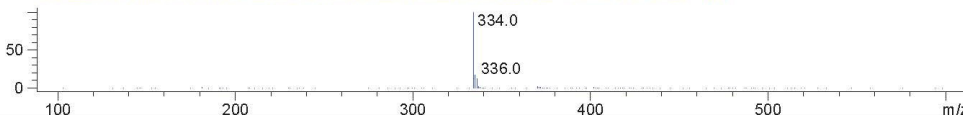

Inj.Date 4/15/2021

Y

-SL-

Acq. Method C:\HPCHEM\ -> ->

**Figure S28.** LCMS spectrum of *N*-[4-(Aminosulfonyl)phenyl]-4-methyl-4*H*-thieno[3,2-*b*]pyrrole-5-carboxamide (**8a**).

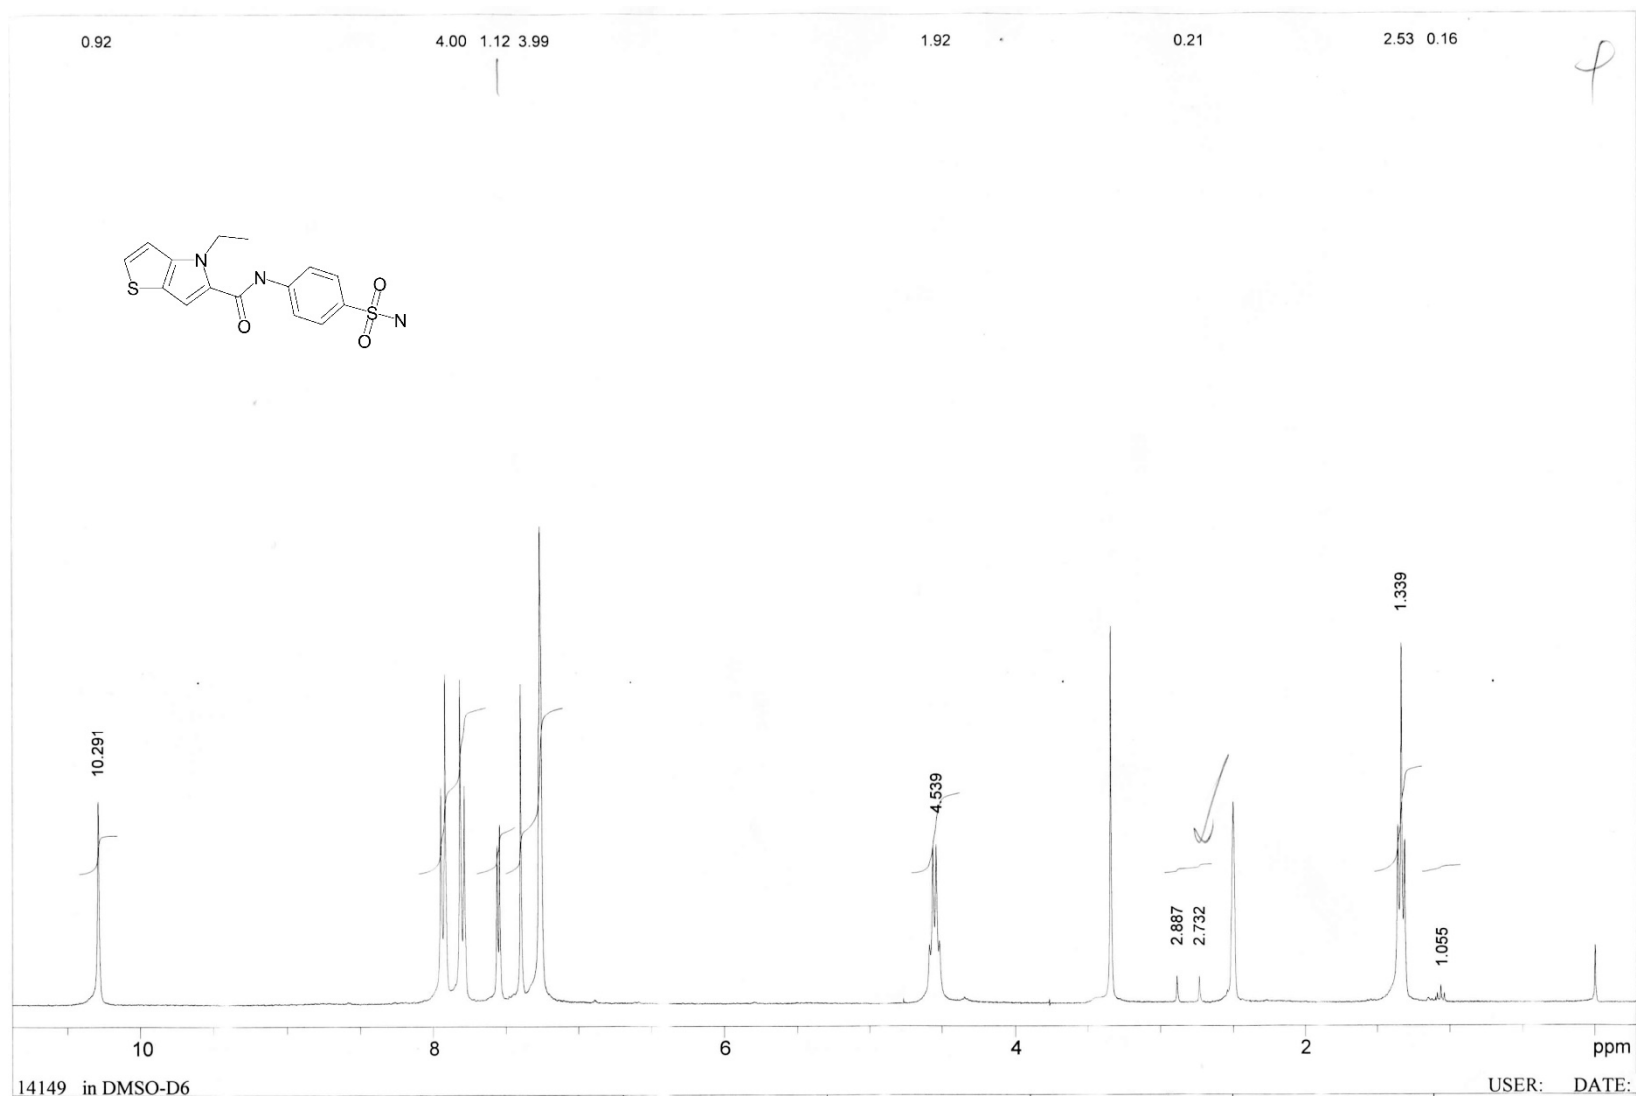

**Figure S29.** <sup>1</sup>H NMR spectrum of *N*-[4-(Aminosulfonyl)phenyl]-4-ethyl-4*H*-thieno[3,2-*b*]pyrrole-5-carboxamide (**8b**).

vgk018

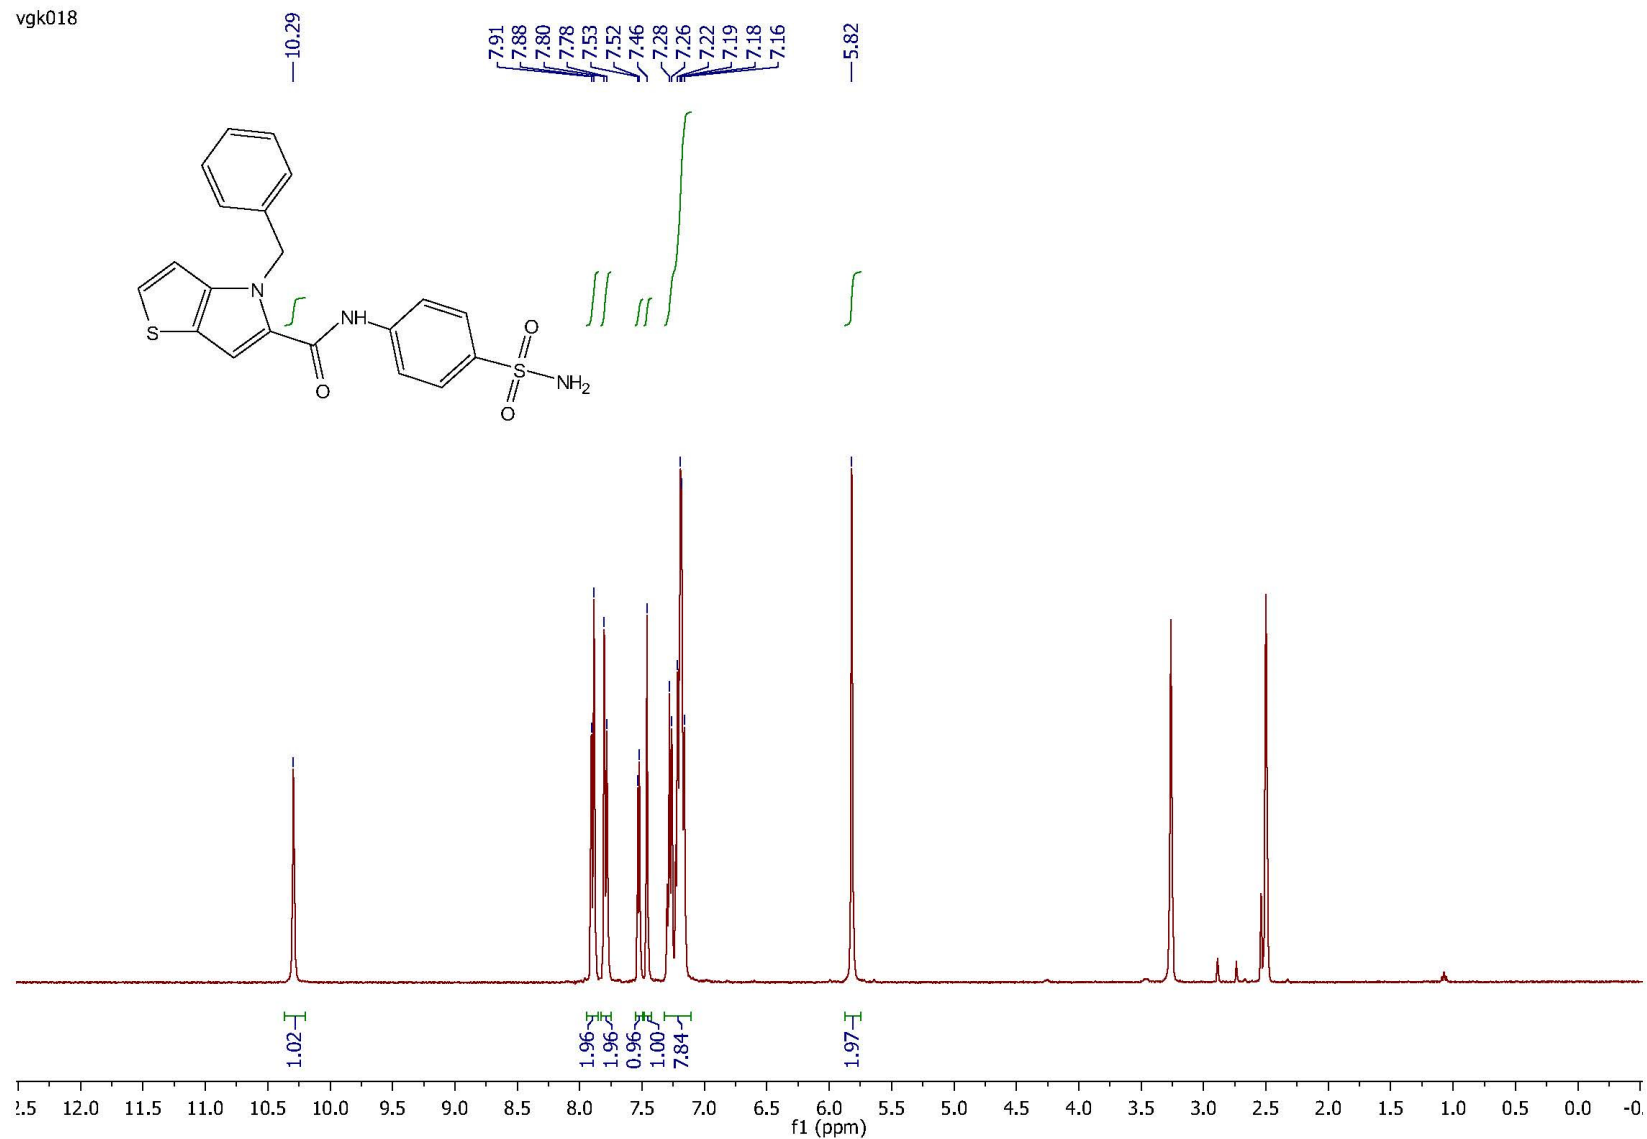

**Figure S30.** <sup>1</sup>H NMR spectrum of *N*-[4-(Aminosulfonyl)phenyl]-4-benzyl-4*H*-thieno[3,2-*b*]pyrrole-5-carboxamide (**8c**).

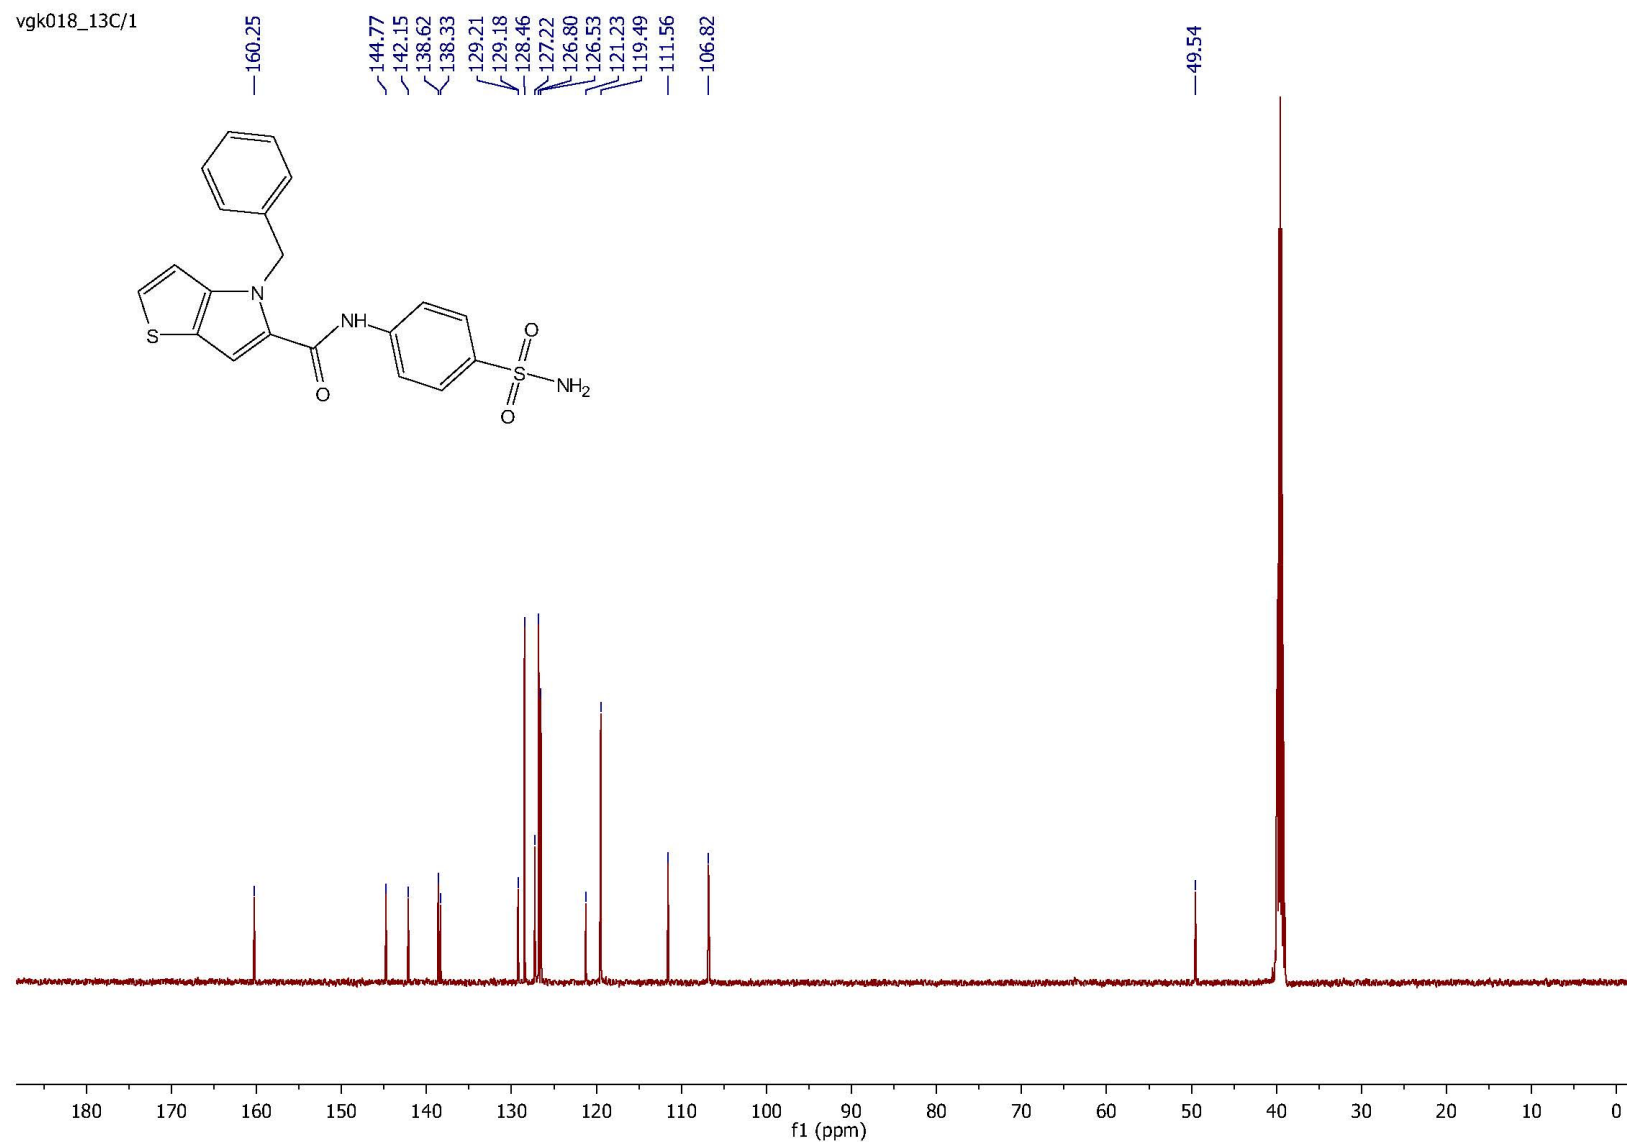

**Figure S31.** <sup>13</sup>C NMR spectrum of *N*-[4-(Aminosulfonyl)phenyl]-4-benzyl-4*H*-thieno[3,2-*b*]pyrrole-5-carboxamide (**8c**).

MaxPeak: 100.00%  
Ret\_Time: 1.339 min

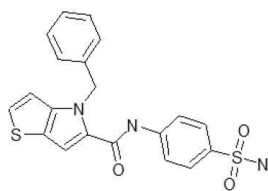

**Mol Wt**

**Exact Mass**

| # | Time  | Area%  |
|---|-------|--------|
| 1 | 1.339 | 100.00 |

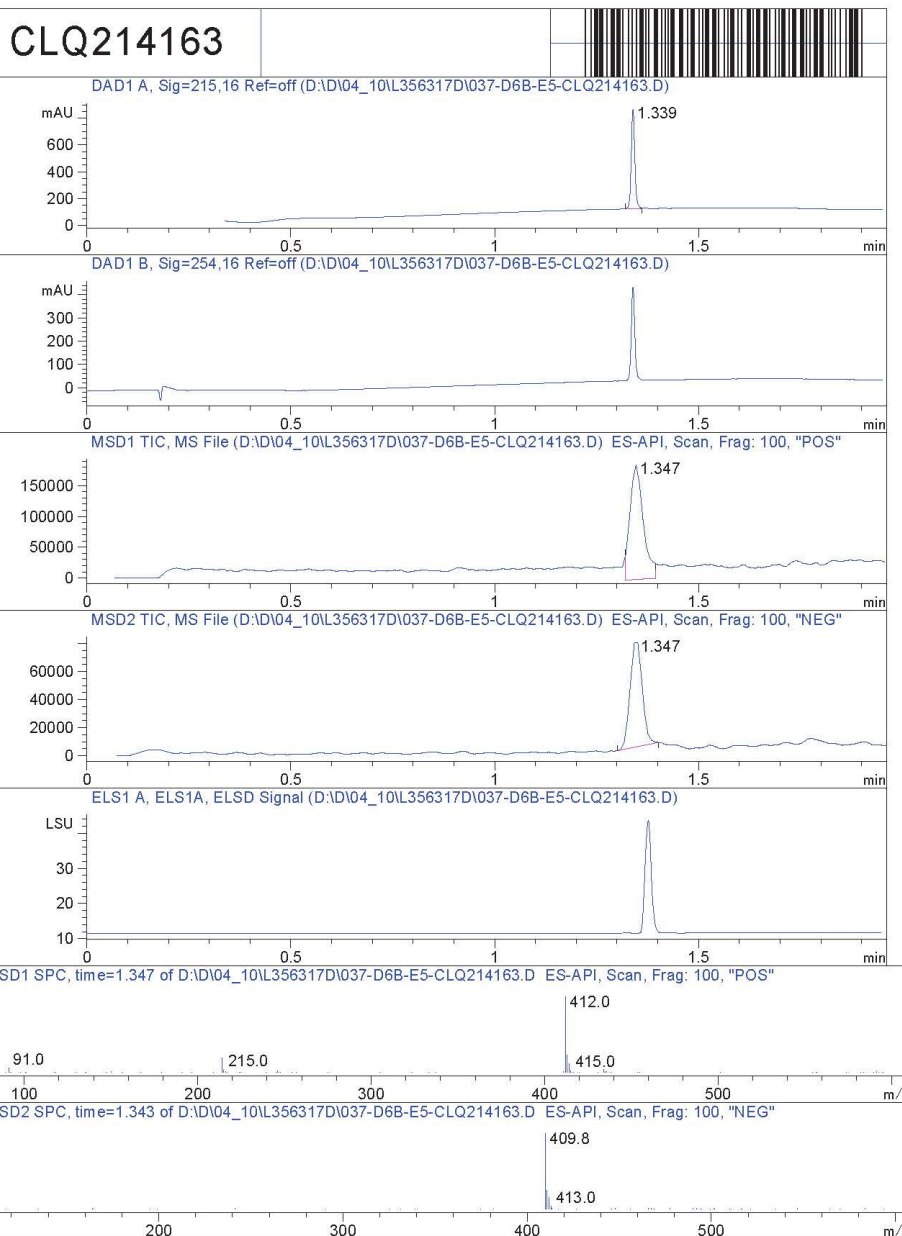

Inj.Date 4/9/2021

N

-15-

Acq. Method C:\Chem32\> ->

**Figure S32.** LCMS spectrum of *N*-[4-(Aminosulfonyl)phenyl]-4-benzyl-4H-thieno[3,2-b]pyrrole-5-carboxamide (**8c**).

vgk019/1

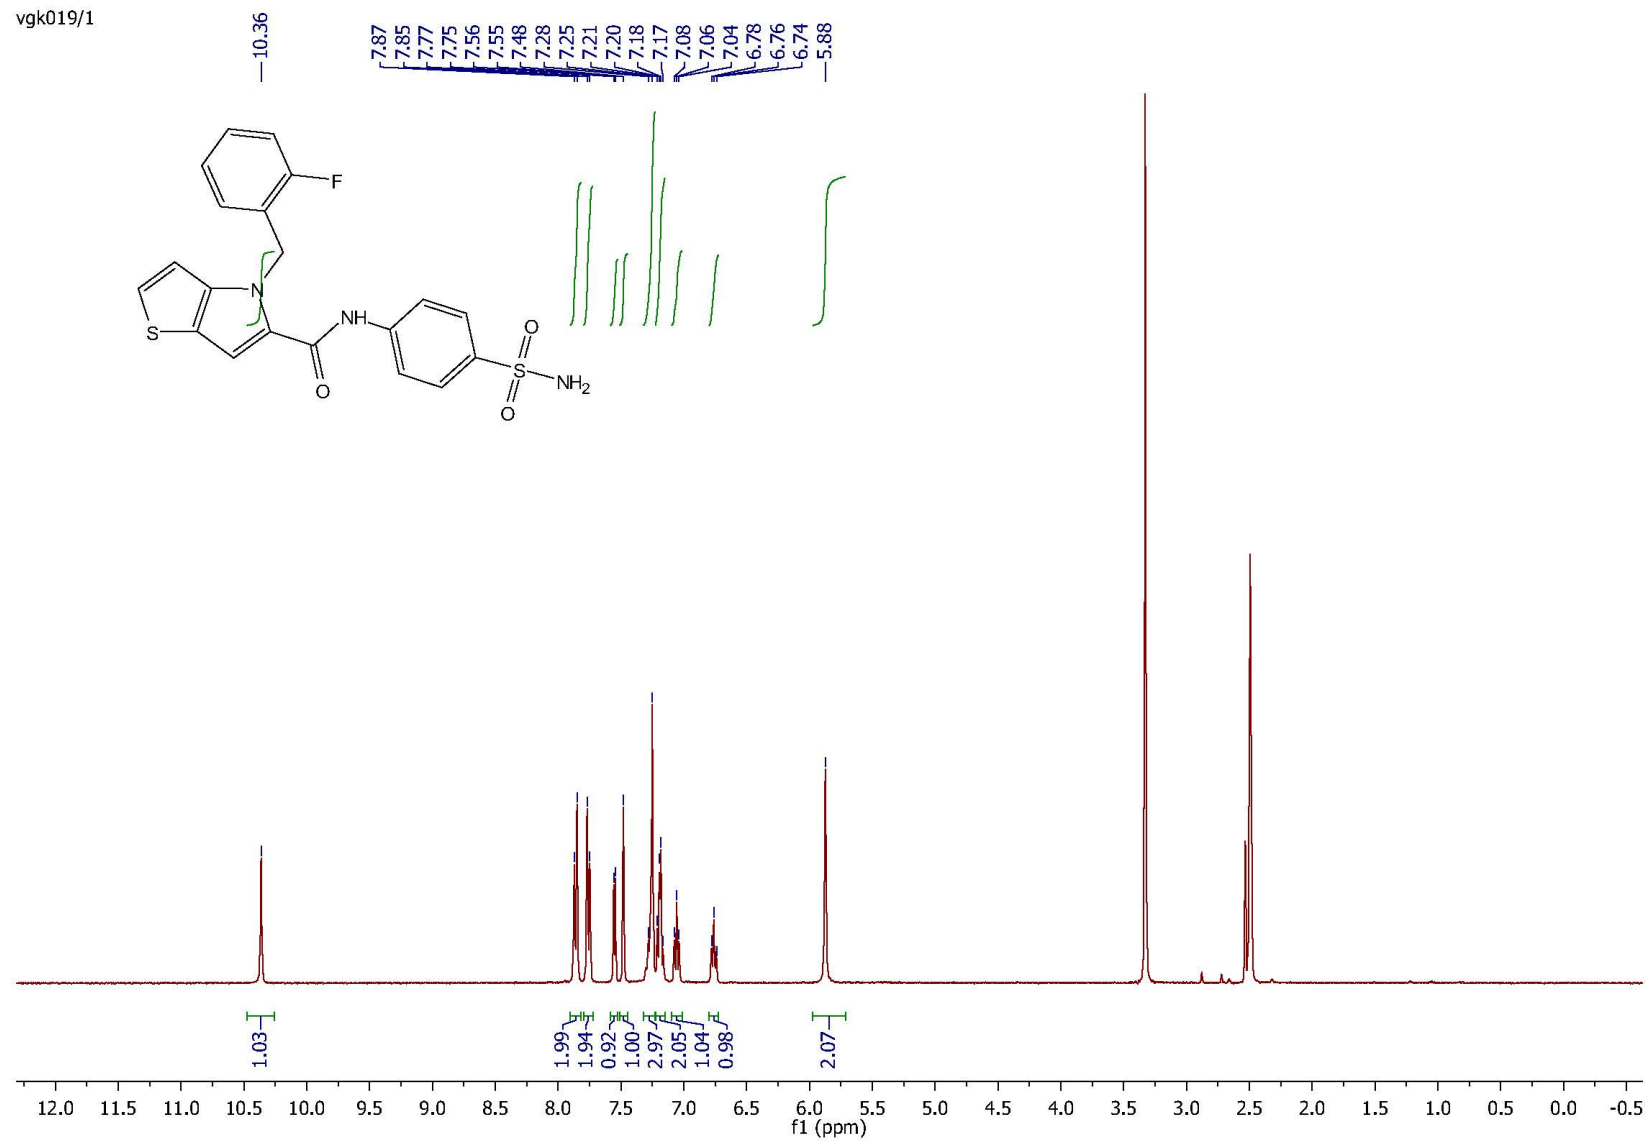

**Figure S33.** <sup>1</sup>H NMR spectrum of *N*-[4-(Aminosulfonyl)phenyl]-4-(2-fluorobenzyl)-4*H*-thieno[3,2-*b*]pyrrole-5-carboxamide (**8d**).

MaxPeak: 100.00%  
Ret\_Time: 1.294 min

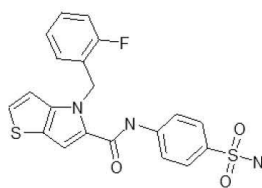

**Mol Wt**  
**Exact Mass**

| # | Time  | Area%  |
|---|-------|--------|
| 1 | 1.294 | 100.00 |

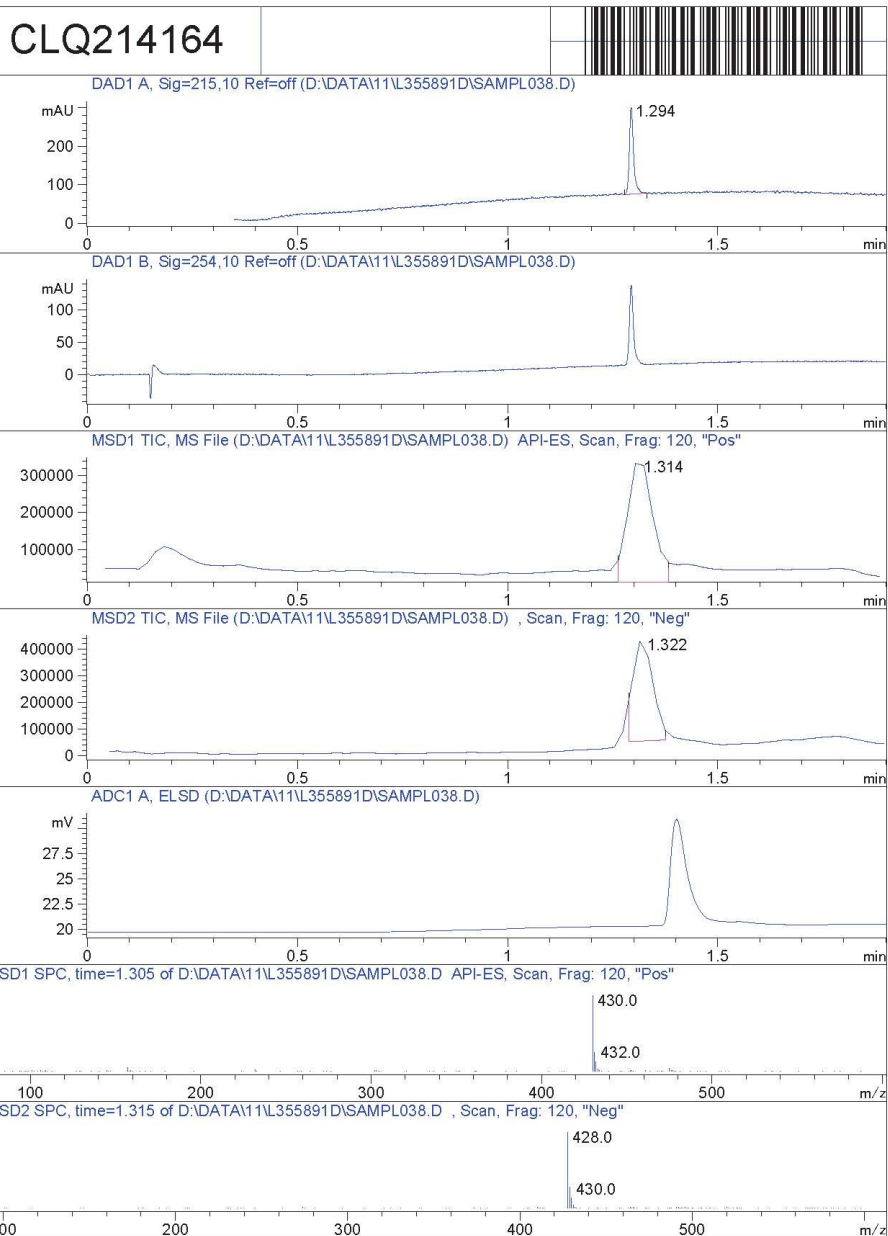

Inj.Date 4/10/2021

LB

-SL-

Acq. Method C:\HPCHEM\> ->

**Figure S34.** LCMS spectrum of *N*-[4-(Aminosulfonyl)phenyl]-4-(2-fluorobenzyl)-4*H*-thieno[3,2-*b*]pyrrole-5-carboxamide (**8d**).

13990 in DMSO-D6

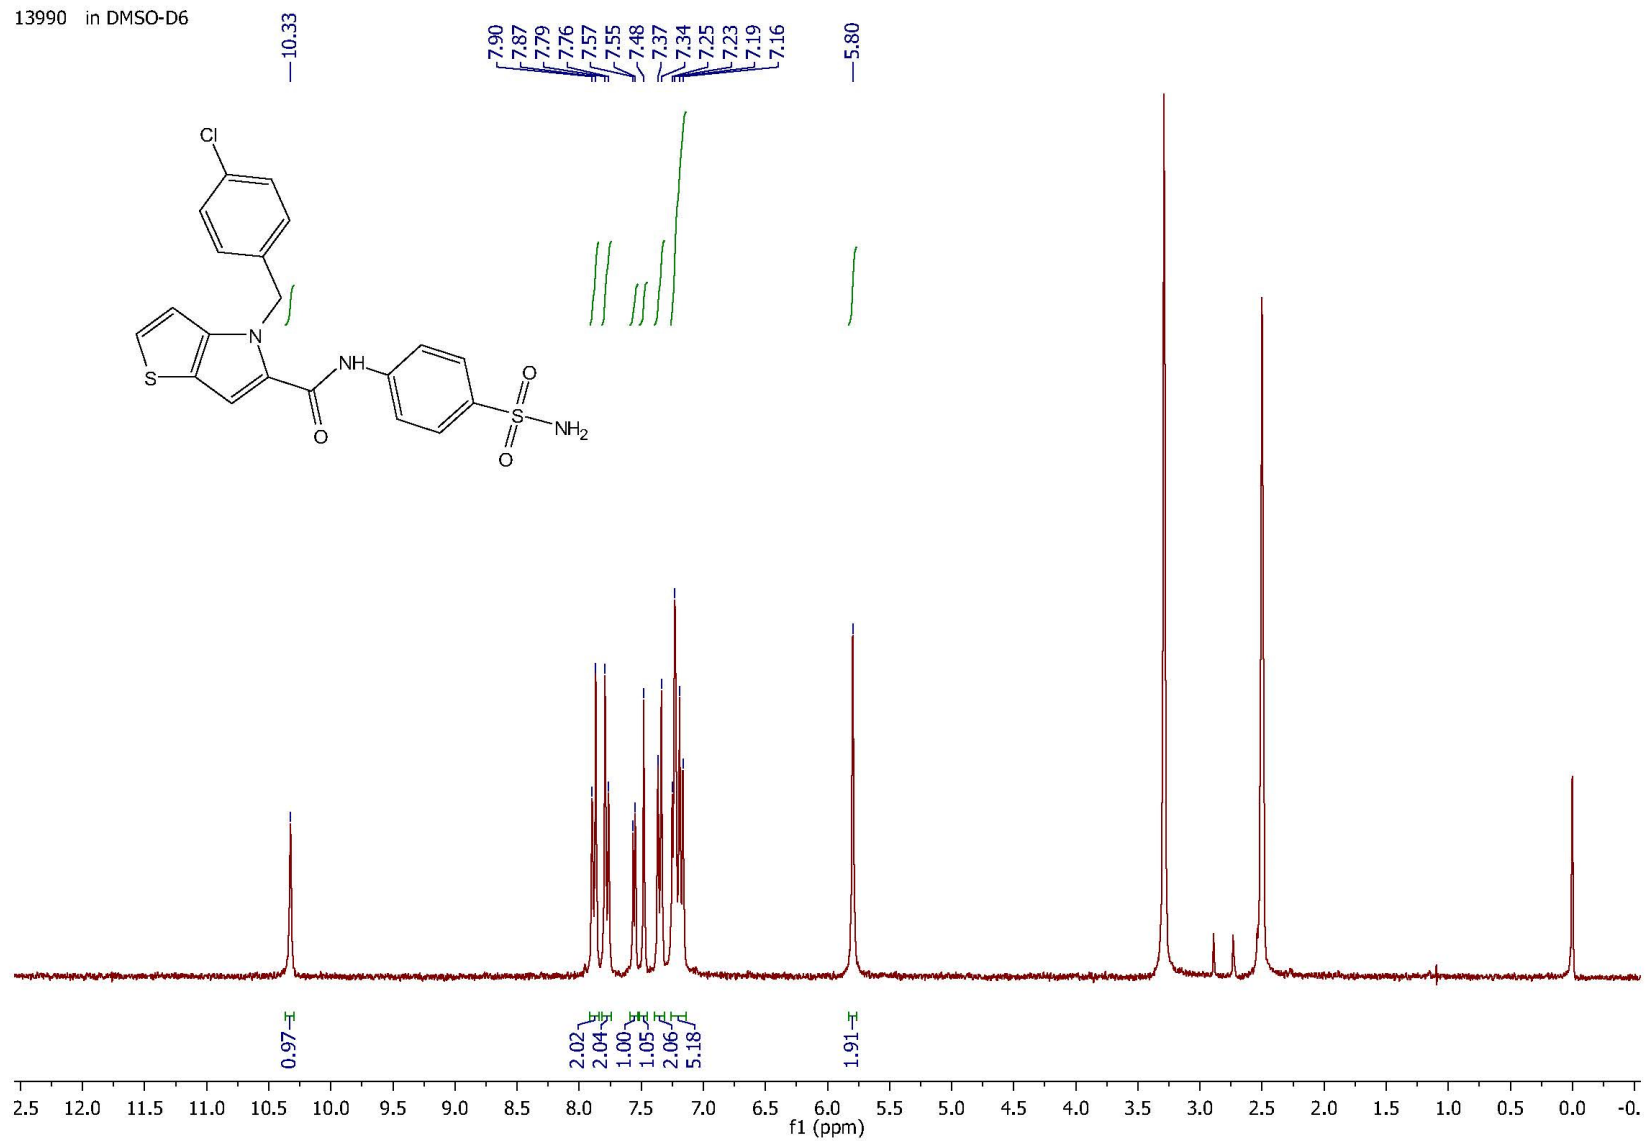

**Figure S35.** <sup>1</sup>H NMR spectrum of *N*-[4-(Aminosulfonyl)phenyl]-4-(4-chlorobenzyl)-4*H*-thieno[3,2-*b*]pyrrole-5-carboxamide (**8f**).



MaxPeak: 100.00%  
Ret\_Time: 1.406 min

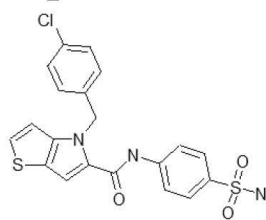

| Mol Wt<br>Exact Mass |       |        |
|----------------------|-------|--------|
| #                    | Time  | Area%  |
| 1                    | 1.406 | 100.00 |

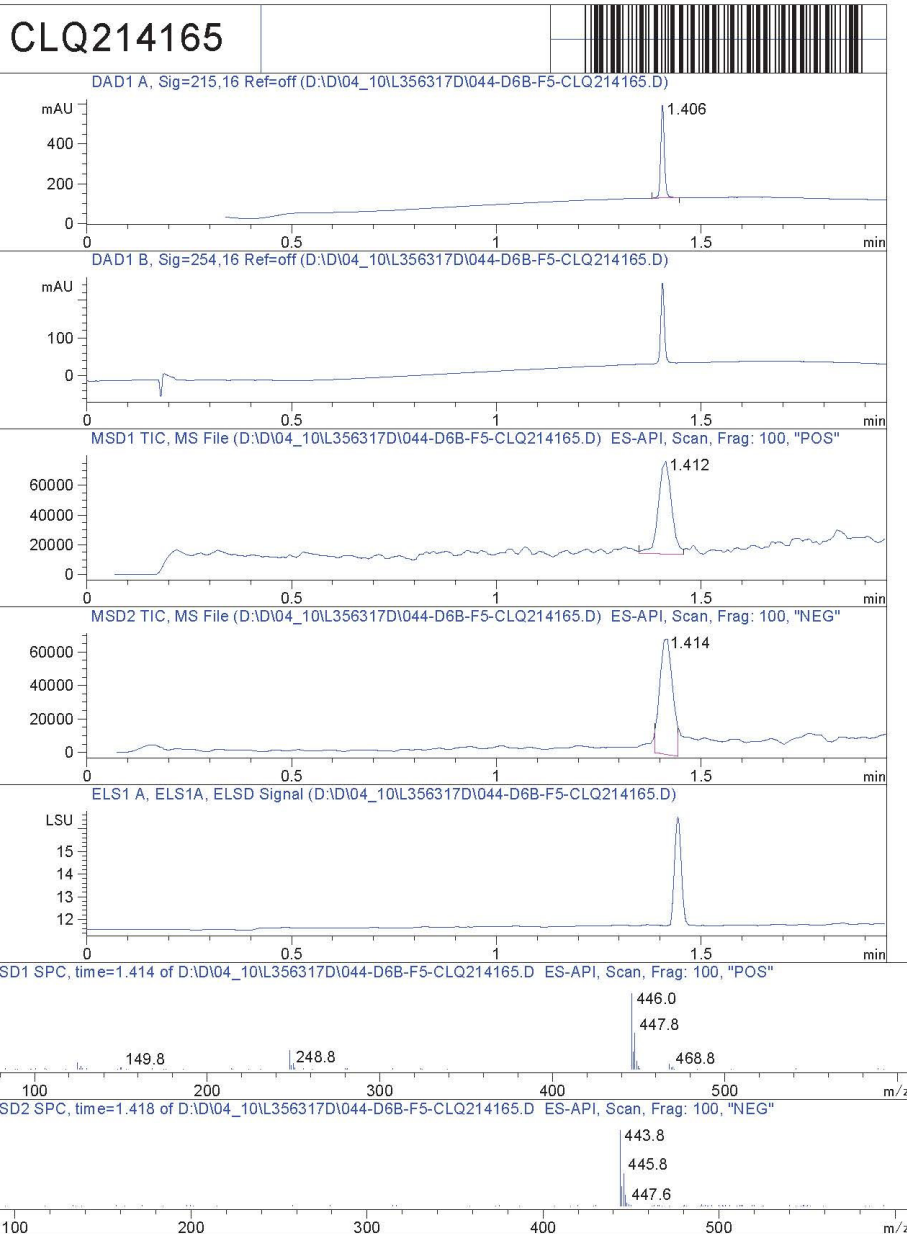

Inj.Date 4/9/2021

N

-15-

Acq. Method C:\Chem32\ -> ->

**Figure S36.** LCMS spectrum of *N*-[4-(Aminosulfonyl)phenyl]-4-(4-chlorobenzyl)-4*H*-thieno[3,2-*b*]pyrrole-5-carboxamide (**8f**).

13592 in DMSO-D6

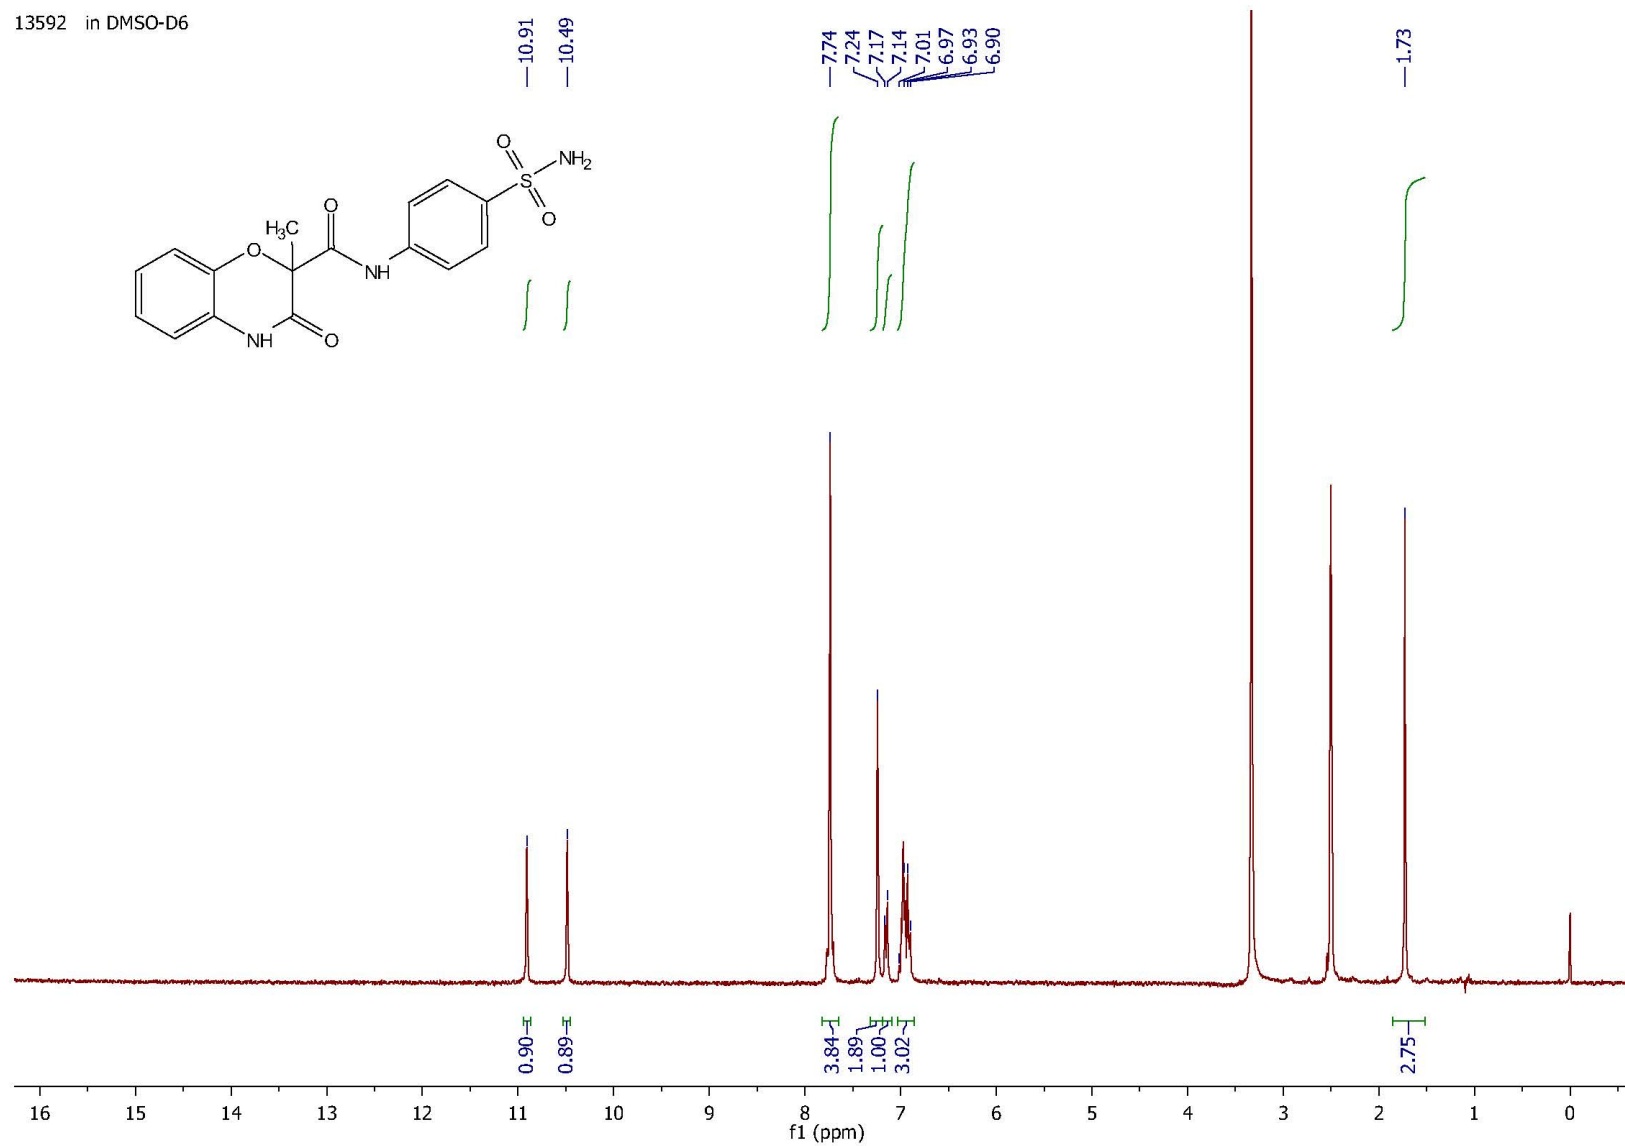

**Figure S41.** <sup>1</sup>H NMR spectrum of *N*-[4-(Aminosulfonyl)phenyl]-2-methyl-3-oxo-3,4-dihydro-2H-1,4-benzoxazine-2-carboxamide (**11**).

MaxPeak: 100.00%  
Ret\_Time: 0.921 min

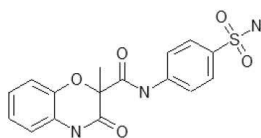

**Mol Wt**  
**Exact Mass**

| # | Time  | Area%  |
|---|-------|--------|
| 1 | 0.921 | 100.00 |

0

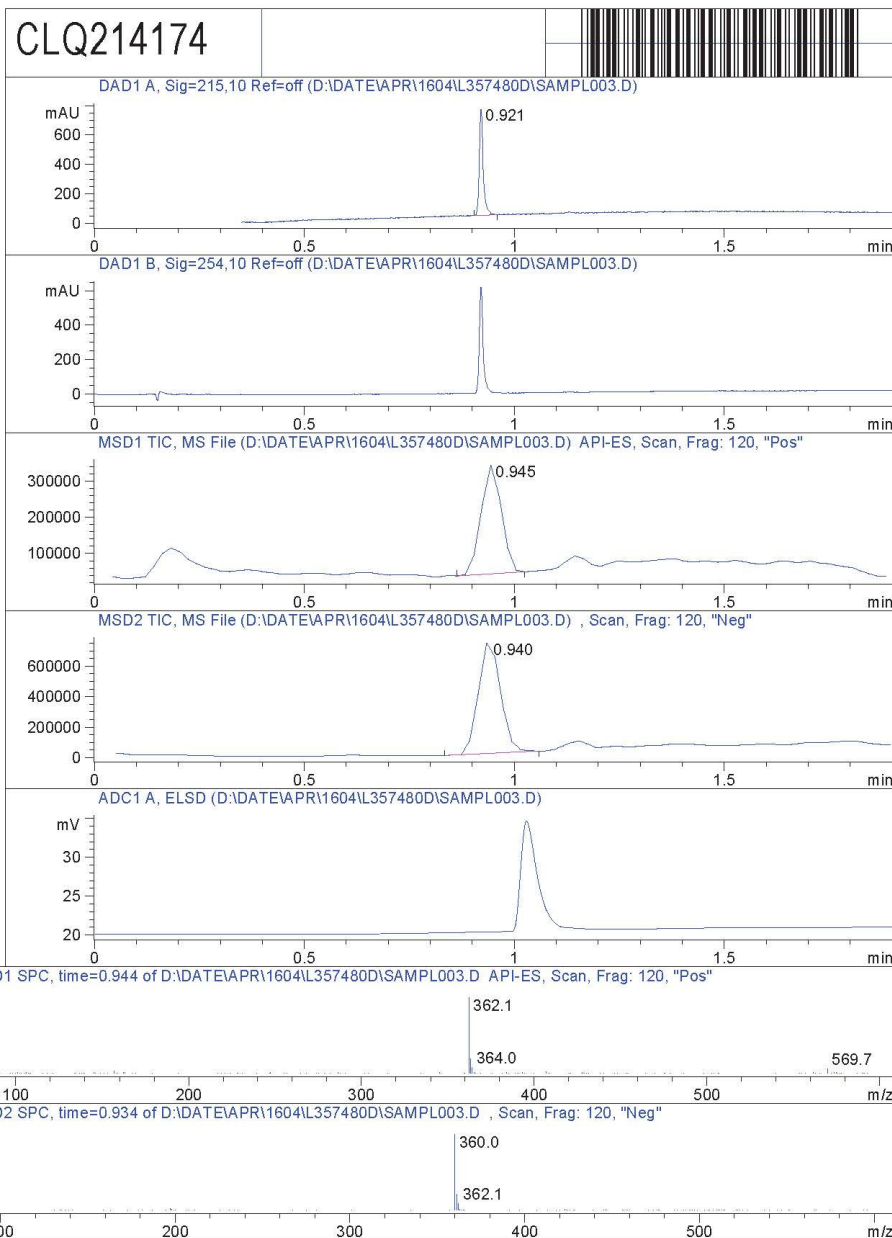

Inj.Date 4/15/2021

Y

-SL-

Acq. Method C:\HPCHEM\ -> ->

**Figure S42.** LCMS spectrum of *N*-[4-(Aminosulfonyl)phenyl]-2-methyl-3-oxo-3,4-dihydro-2H-1,4-benzoxazine-2-carboxamide (**11**).

vgk024

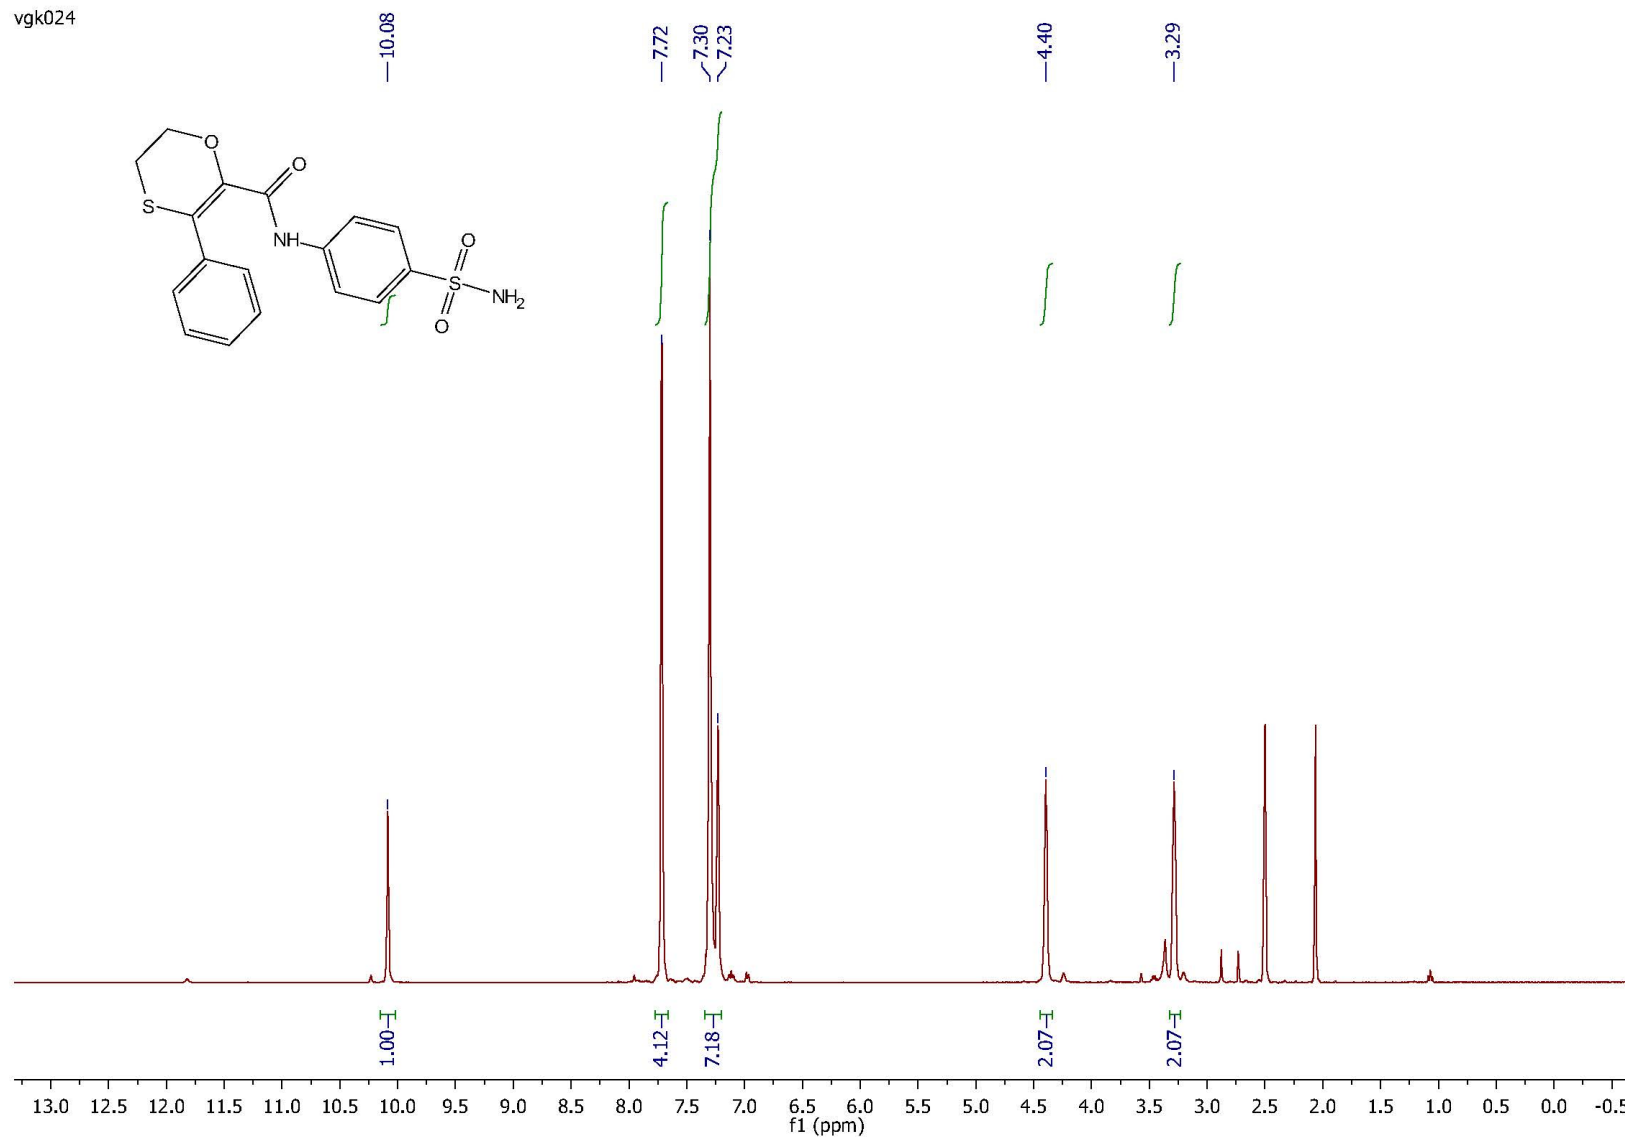

**Figure S43.** <sup>1</sup>H NMR spectrum of *N*-[4-(Aminosulfonyl)phenyl]-3-phenyl-5,6-dihydro-1,4-oxathiine-2-carboxamide (**14a**).

vgk024\_C13  
13C (1H-decoupled)

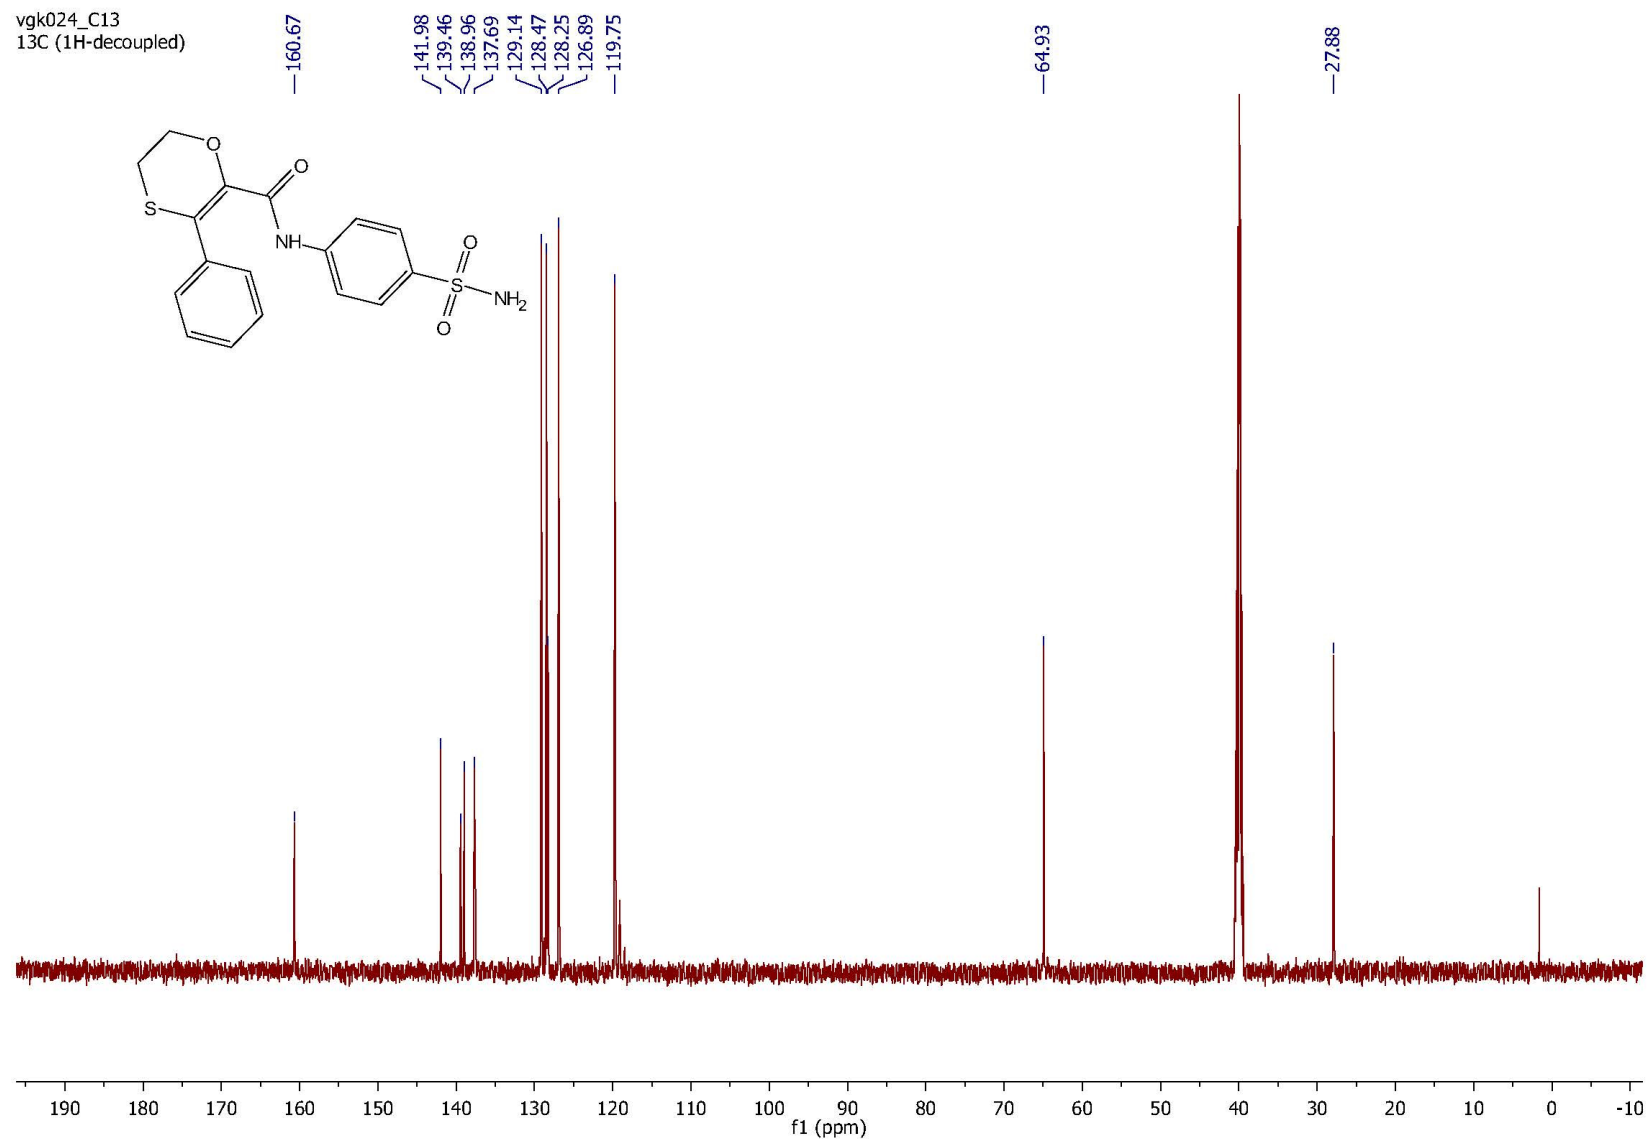

**Figure S44.** <sup>13</sup>C NMR spectrum of *N*-[4-(Aminosulfonyl)phenyl]-3-phenyl-5,6-dihydro-1,4-oxathiine-2-carboxamide (**14a**).

MaxPeak: 93.92%  
Ret\_Time: 1.120 min

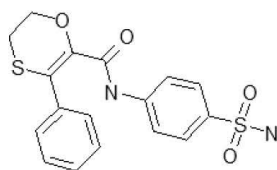

**Mol Wt**  
**Exact Mass**

| # | Time  | Area% |
|---|-------|-------|
| 1 | 1.120 | 93.92 |
| 2 | 1.413 | 6.08  |

CLQ213970

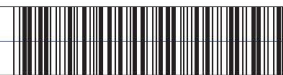

DAD1 A, Sig=215,10 Ref=off (D:\DATE\APR1604\357480D\SAMPL013.D)

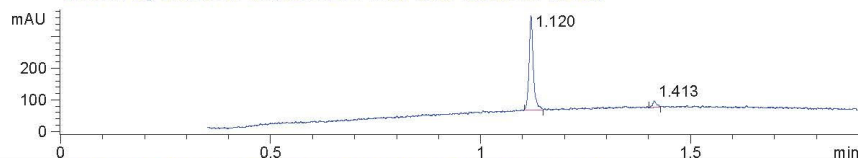

DAD1 B, Sig=254,10 Ref=off (D:\DATE\APR1604\357480D\SAMPL013.D)

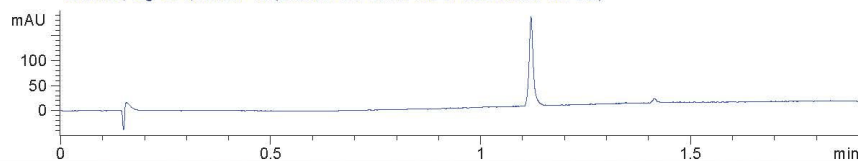

MSD1 TIC, MS File (D:\DATE\APR1604\357480D\SAMPL013.D) API-ES, Scan, Frag: 120, "Pos"

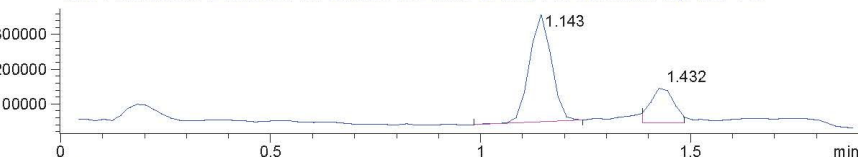

MSD2 TIC, MS File (D:\DATE\APR1604\357480D\SAMPL013.D) , Scan, Frag: 120, "Neg"

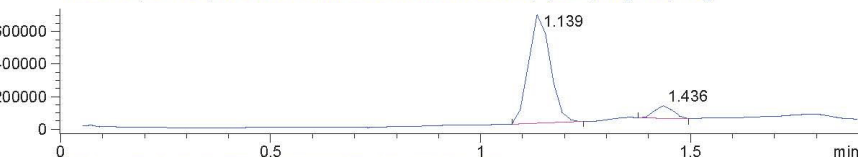

ADC1 A, ELSD (D:\DATE\APR1604\357480D\SAMPL013.D)

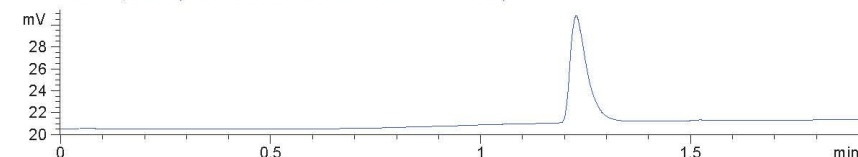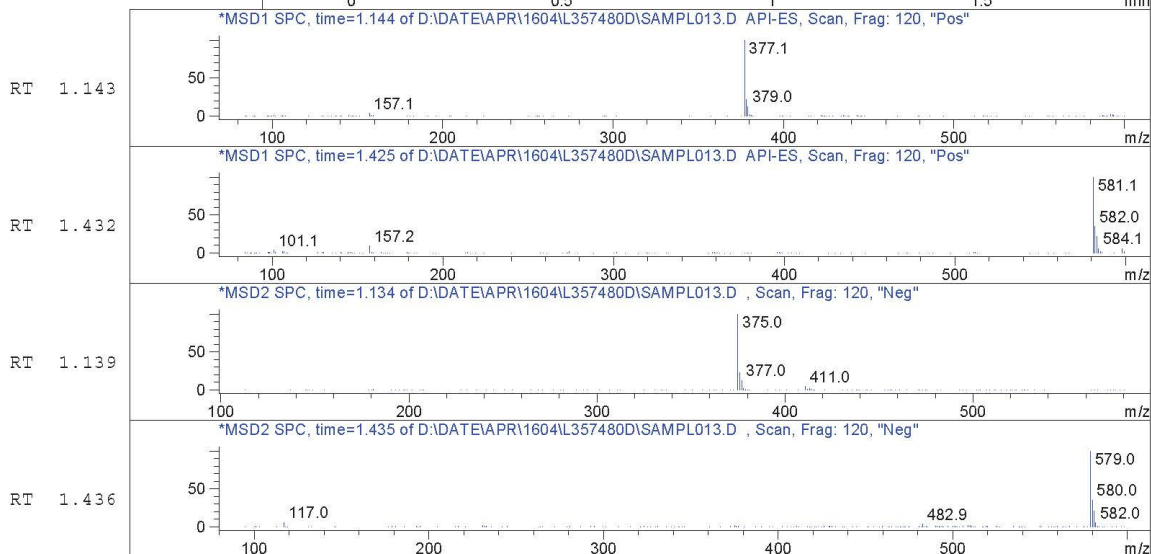

Inj.Date 4/15/2021

Y

-SL-

Acq. Method C:\HPCHEM\ -> ->

**Figure S45.** LCMS spectrum of *N*-[4-(Aminosulfonyl)phenyl]-3-phenyl-5,6-dihydro-1,4-oxathiine-2-carboxamide (**14a**).

vgk025

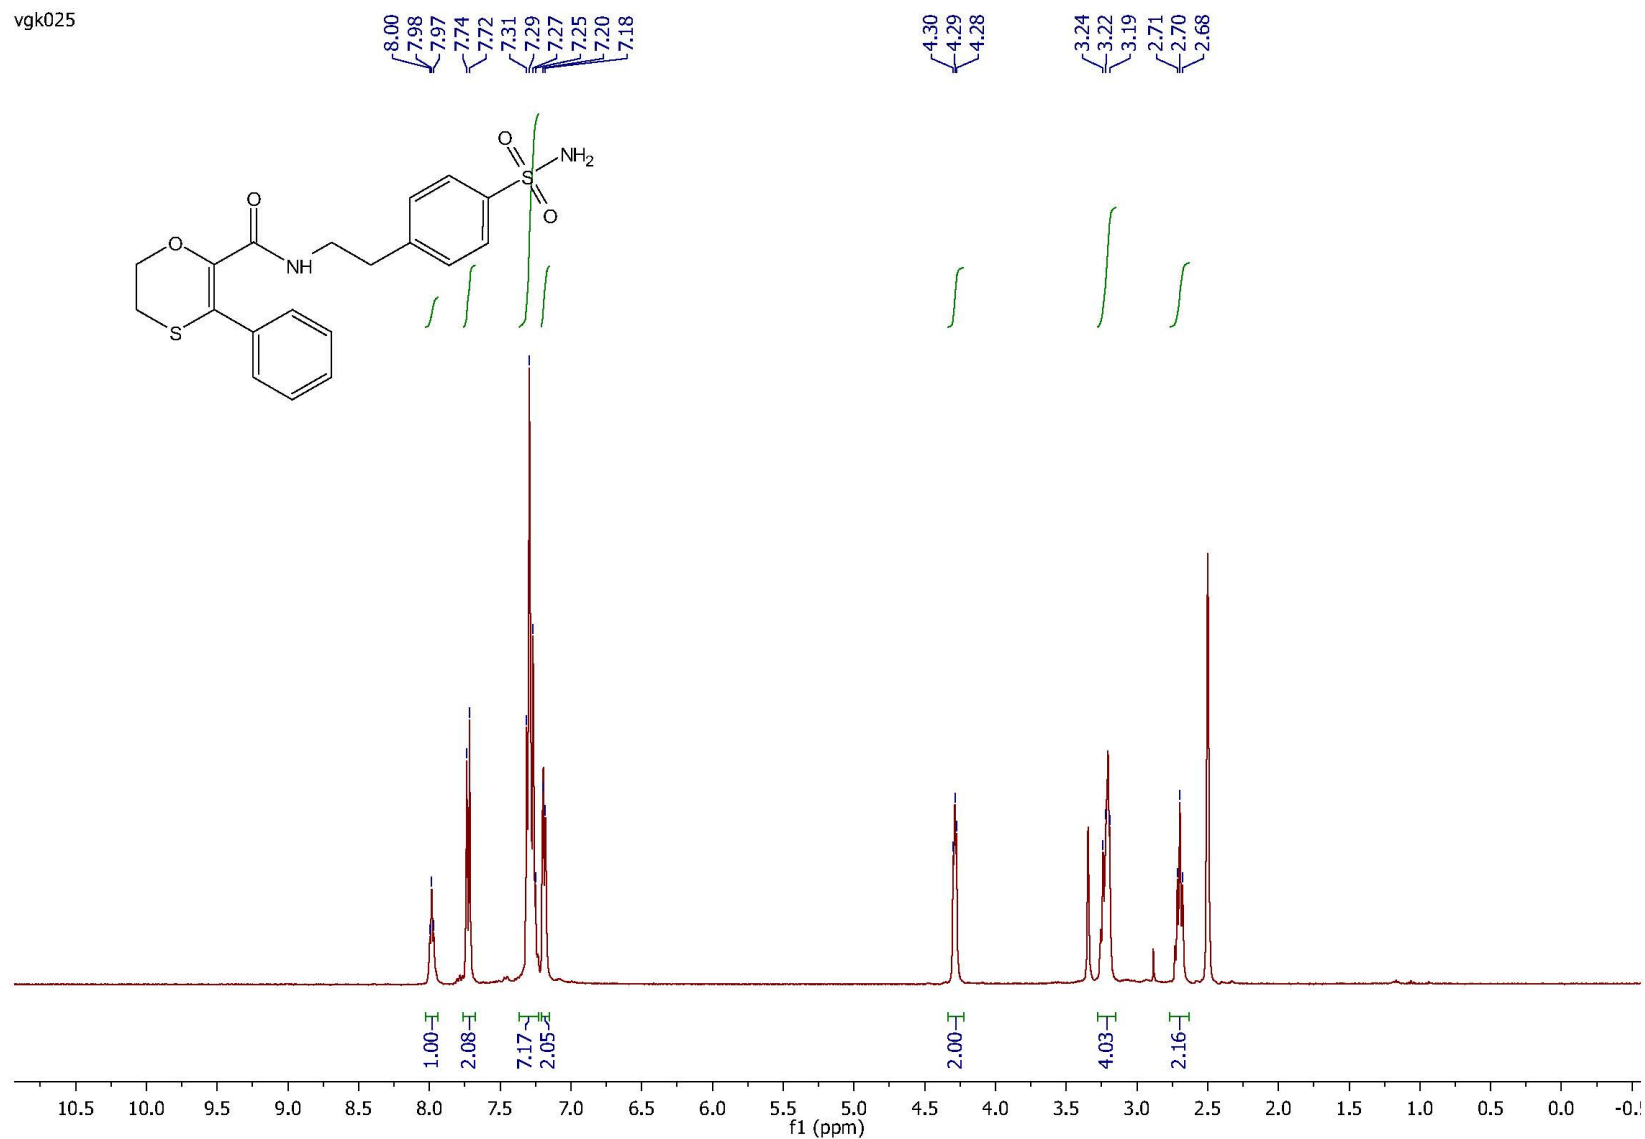

**Figure S46.** <sup>1</sup>H NMR spectrum of *N*-{2-[4-(Aminosulfonyl)phenyl]ethyl}-3-phenyl-5,6-dihydro-1,4-oxathiine-2-carboxamide (**14b**).

vgk025\_C13  
13C (1H-decoupled)

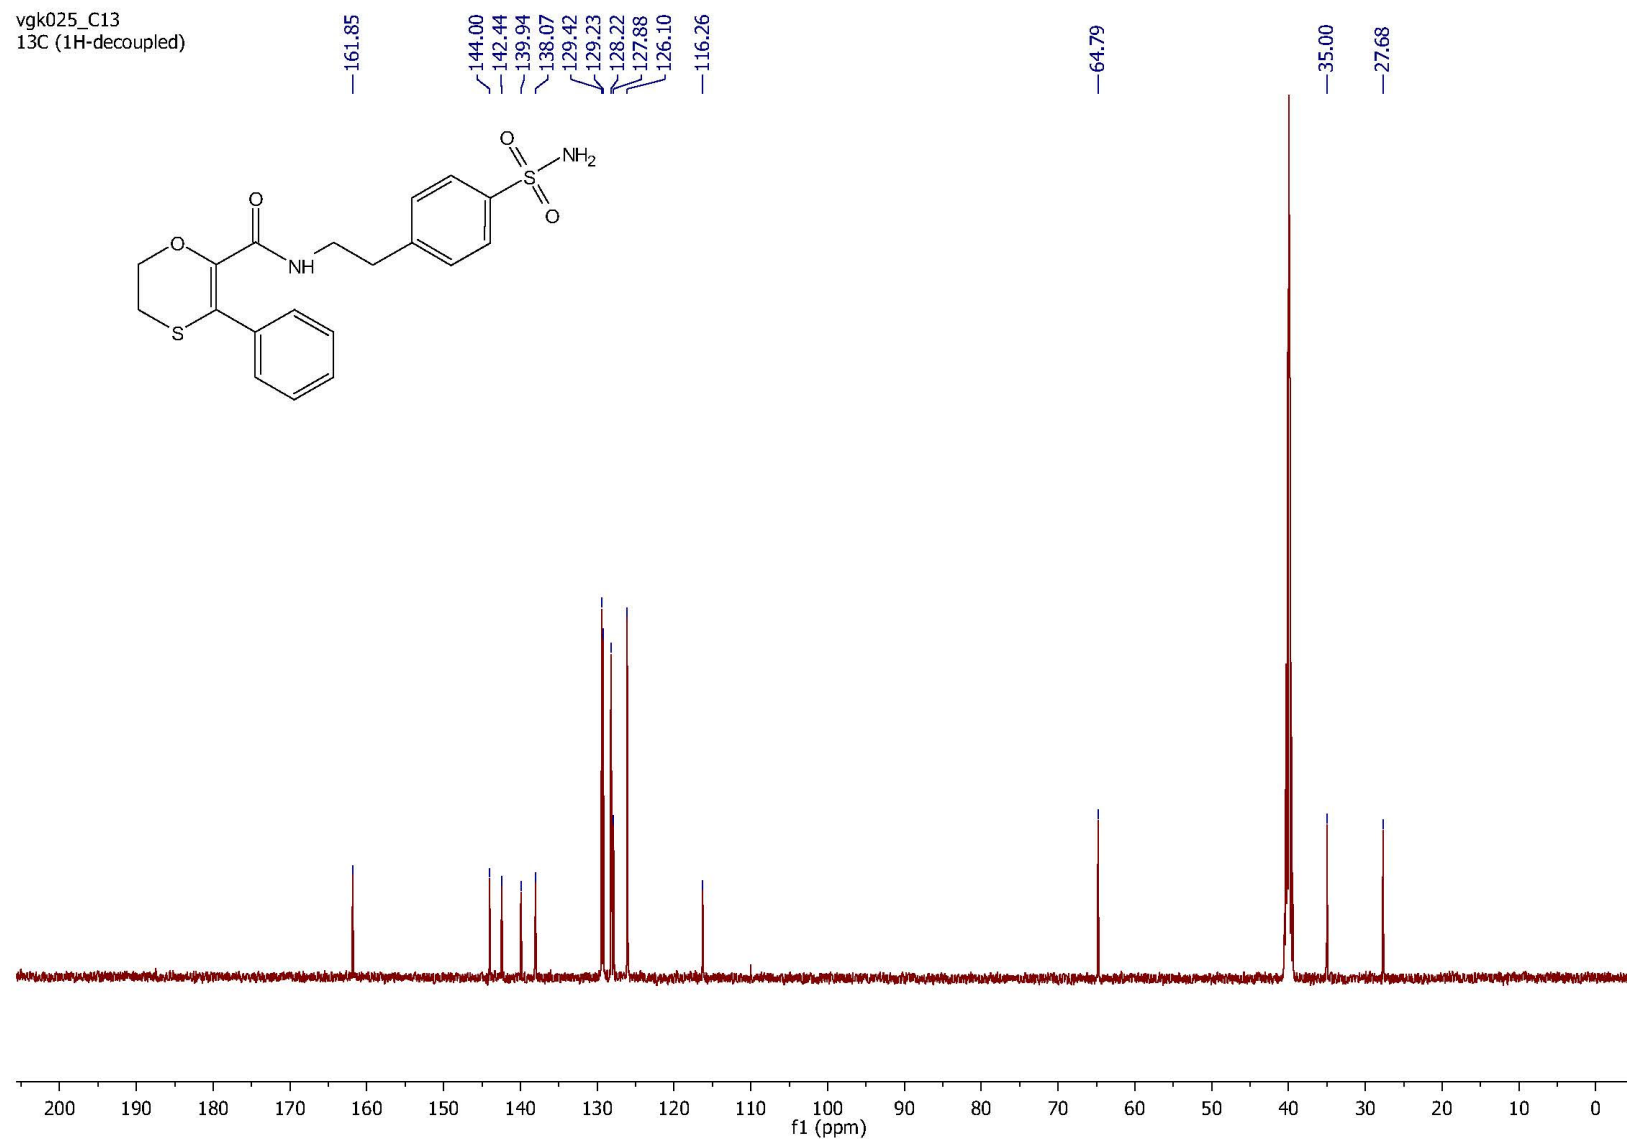

**Figure S47.** <sup>13</sup>C NMR spectrum of *N*-{2-[4-(Aminosulfonyl)phenyl]ethyl}-3-phenyl-5,6-dihydro-1,4-oxathiine-2-carboxamide (**14b**).



MaxPeak: 100.00%  
Ret\_Time: 1.086 min

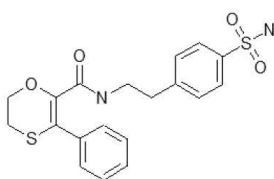

**Mol Wt**  
**Exact Mass**

| # | Time  | Area%  |
|---|-------|--------|
| 1 | 1.086 | 100.00 |

0

CLQ213968

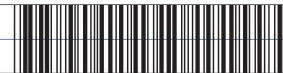

DAD1 A, Sig=215,10 Ref=off (D:\DATE\APR1604\1357480D\SAMPL014.D)

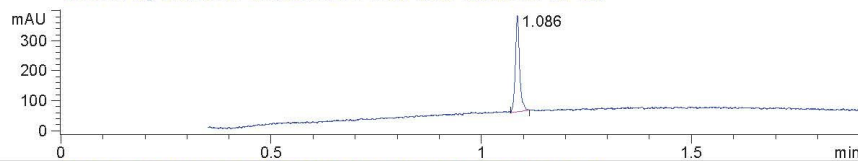

DAD1 B, Sig=254,10 Ref=off (D:\DATE\APR1604\1357480D\SAMPL014.D)

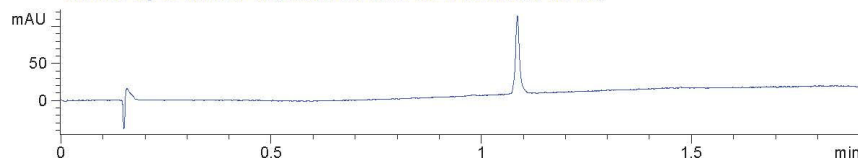

MSD1 TIC, MS File (D:\DATE\APR1604\1357480D\SAMPL014.D) API-ES, Scan, Frag: 120, "Pos"

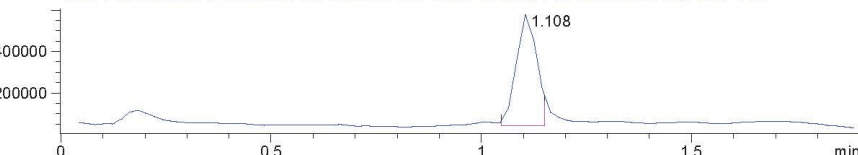

MSD2 TIC, MS File (D:\DATE\APR1604\1357480D\SAMPL014.D) , Scan, Frag: 120, "Neg"

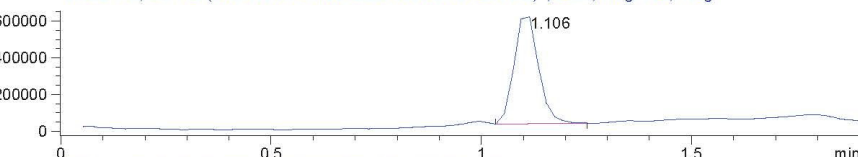

ADC1 A, ELSD (D:\DATE\APR1604\1357480D\SAMPL014.D)

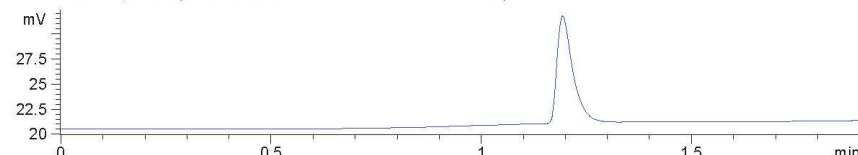

RT 1.108

\*MSD1 SPC, time=1.105 of D:\DATE\APR1604\1357480D\SAMPL014.D API-ES, Scan, Frag: 120, "Pos"

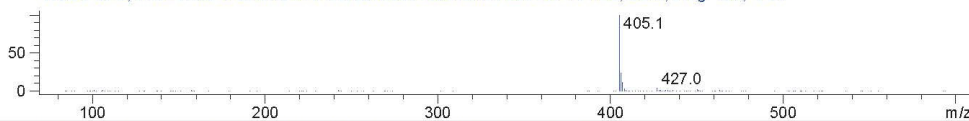

RT 1.106

\*MSD2 SPC, time=1.115 of D:\DATE\APR1604\1357480D\SAMPL014.D , Scan, Frag: 120, "Neg"

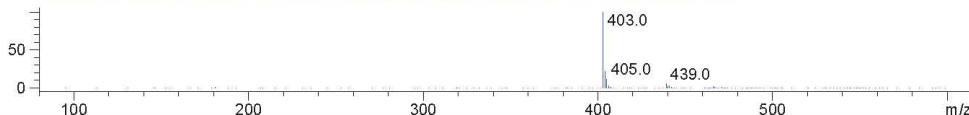

Inj.Date 4/15/2021

Y

-SL-

Acq. Method C:\HPCHEM\ -> ->

**Figure S48.** LCMS spectrum of *N*-{2-[4-(Aminosulfonyl)phenyl]ethyl}-3-phenyl-5,6-dihydro-1,4-oxathiine-2-carboxamide (**14b**).
